1 **Short title:**

2 Cell wall damage induced signalling in rice

3 **Article title:**

4 The dual function receptor kinase, OsWAKL21.2, is involved in elaboration of  
5 lipaseA/esterase induced immune responses in rice

6 **Authors:**

7 Kamal Kumar Malukani<sup>1</sup>, Ashish Ranjan<sup>1,2</sup>, Hota Shiva Jyothi<sup>1</sup>, Hitendra Kumar Patel<sup>1</sup>,  
8 Ramesh V. Sonti<sup>1,3,#</sup>

9 **Authors Affiliation:**

10 <sup>1</sup>CSIR-Centre for Cellular and Molecular Biology, Hyderabad, India, <sup>2</sup>Hyderabad Central  
11 University, Hyderabad, India, <sup>3</sup>National Institute of Plant Genome Research, New Delhi,  
12 India. # Corresponding author

13 **Corresponding author e-mail:** [sonti@ccmb.res.in](mailto:sonti@ccmb.res.in)

14 **One sentence Summary:**

15 A novel rice receptor WAKL21 that sense cell wall damage caused by Xanthomonas secreted  
16 cell wall degrading enzyme to induce immune responses.

17 **Author's contribution:**

18 R.V.S., K.K.M. and A.R. designed the experiments. A.R. and H.K.P. performed microarray.  
19 A.R. and K.K.M. and S.J.H. performed cloning and transient expression studies. K.K.M.  
20 performed publicly available transcriptome analysis, qRT-PCR analysis, Western blotting,  
21 and biochemical characterization experiments and wrote the paper. A.R. and K.K.M.  
22 generated transgenic Arabidopsis lines on which K.K.M. and S.J.H. performed experiments.  
23 K.K.M., H.K.P. and R.V.S. finalised the manuscript, which was approved by all authors.

24 **Funding Information:**

25 This work was supported by the XII<sup>th</sup> five-year plan project, Plant-Microbe and Soil  
26 Interactions (BSC0117) of the Council of Scientific and Industrial research and J. C. Bose  
27 fellowship to R.V.S. K.K.M. and A.R. acknowledge Council of Scientific & Industrial  
28 Research (CSIR), India for the fellowship.

29 **Abstract:**

30 Plant pathogens secrete cell wall degrading enzymes (CWDEs) to degrade various  
31 components of the plant cell wall. Plants sense this cell wall damage as a mark of infection  
32 and induce immune responses. Little is known about the plant functions that are involved in  
33 the elaboration of cell wall damage-induced immune responses. Transcriptome analysis  
34 revealed that a rice receptor kinase, *WALL-ASSOCIATED KINASE-LIKE 21* (*OsWAKL21.2*),  
35 is upregulated following treatment with either *Xanthomonas oryzae* pv. *oryzae* (*Xoo*, a  
36 bacterial pathogen) or lipaseA/esterase (LipA: a CWDE of *Xoo*). Downregulation of  
37 *OsWAKL21.2* attenuates LipA mediated immune responses. Overexpression of *OsWAKL21.2*  
38 in rice mimics LipA treatment mediated induction of immune responses and enhanced  
39 expression of defence related genes, indicating it could be involved in the perception of LipA  
40 induced cell wall damage in rice. *OsWAKL21.2* is a dual function kinase having *in-vitro*  
41 kinase and guanylate cyclase (GC) activities. Ectopic expression of *OsWAKL21.2* in  
42 Arabidopsis also activates plant immune responses. Interestingly, *OsWAKL21.2* needs kinase  
43 activity to activate rice immune responses while in Arabidopsis it needs GC activity. Our  
44 study reveals a novel receptor kinase involved in elaboration of cell wall damage induced rice  
45 immune responses that can activate similar immune responses in two different species via  
46 two different mechanisms.

47 **Introduction:**

48 The plant cell wall acts as a formidable barrier for pathogens. Plant pathogens secrete a  
49 battery of cell wall degrading enzymes (CWDEs) to degrade different components of the  
50 plant cell wall (Albersheim and Anderson-Prouty, 1975, Hématy et al., 2009). CWDEs act as  
51 a double-edged sword for pathogens as on one hand the activity of these enzymes leads to  
52 cell wall degradation, on the other hand, it releases cell wall degradation products that can  
53 elicit plant immune responses (Jha et al., 2007). Such host derived molecules that can elicit  
54 immune responses are called damage associated molecular patterns (DAMPs). Some known  
55 cell wall degradation products that act as DAMPs include pectin degradation products  
56 oligogalacturonide (OG), hemicellulose degradation products such as xyloglucan oligomers,  
57 and cellulose degradation products such as cellobiose and cellotriose (Gust et al., 2017, de  
58 Azevedo Souza et al., 2017, Claverie et al., 2018). These DAMPs are sensed by membrane-  
59 localised receptor-like kinases (RLKs) that activate the signaling cascade. Some known  
60 receptors of the DAMPs are AtPEPR1/2 for plant elicitor peptides (Pep), AtDORN1 for

61 eATP, SYR1 for systemins and AtWAK1/2 for oligogalacturonide (OG) (Brutus et al., 2010,  
62 Gust et al., 2017, Wang et al., 2018).

63 The wall-associated kinases (WAKs) constitute a unique class of receptor kinases which are  
64 known to be closely associated with the plant cell wall (Verica and He, 2002). WAKs are  
65 known to be involved in many physiological processes including cell elongation, pollen  
66 development and abiotic and biotic stress tolerance (Kohorn, 2015). Members of the WAK  
67 gene family have been known to interact with pectin and pectin degradation products (OGs).  
68 AtWAK1 and AtWAK2 have been reported to interact with pectin and OGs *in vitro* (Kohorn  
69 et al., 2006, Kohorn et al., 2009). Some proteins of the WAK gene family have also been  
70 known to be involved in immune responses in many plant species such as Arabidopsis, rice,  
71 maize and wheat (He et al., 1998, Li et al., 2009, Zhang et al., 2017, Zuo et al., 2015, Hurni et  
72 al., 2015, Harkenrider et al., 2016, Hu et al., 2017, Saintenac et al., 2018). In most of the  
73 cases, a receptor kinase or receptor-coreceptor complex recognises the ligand and triggers  
74 phosphorylation events leading to activation of MAP kinase signaling and its downstream  
75 targets (Meng and Zhang, 2013). However, some recent studies also indicate the presence of  
76 an alternate signaling system in plants which is mediated by cyclic nucleotides such as cyclic  
77 guanosine monophosphate (cGMP) and cyclic adenosine monophosphate (cAMP) (Gehring  
78 and Turek, 2017). cGMP is generated by guanylate cyclases (GCs) and most of the reported  
79 plant GCs are membrane localised receptor kinases that also contain a functional GC motif  
80 inside the kinase domain (Gehring and Turek, 2017). Such kinases showing these dual  
81 activities are called moonlighting kinases (Wong et al., 2015). In Arabidopsis, some receptor  
82 kinases including a wall associated kinase like gene (*AtWAKL10*) are reported as  
83 moonlighting kinases (Meier et al., 2010).

84 Rice serves as a staple food for more than half of the world population. *Xanthomonas oryzae*  
85 pv. *oryzae* (*Xoo*) causes the serious bacterial blight disease of rice. CWDEs secreted by *Xoo*  
86 include cellulases, xylanases and lipases/esterases (LipA) (Rajeshwari et al., 2005, Jha et al.,  
87 2007). LipA is an important CWDE of *Xoo* and deletion of the LipA gene results in a  
88 significant reduction in the virulence of *Xoo* in rice (Jha et al., 2007). Treatment of rice tissue  
89 with purified LipA leads to the activation of plant immune responses including callose  
90 deposition, programmed cell death and an enhanced tolerance towards *Xoo* (Aparna et al.,  
91 2009). The mechanism of action of LipA on the cell wall is still not clear, but it has been  
92 predicted that it acts by cleaving ester linkages in the rice cell wall (Aparna et al., 2009). Heat  
93 inactivation or mutation of the active site residues of LipA abolishes the biochemical activity

94 as well as the ability to induce immune responses in rice, indicating that the enzymatic  
95 activity of LipA is essential for the induction of immune response (Jha et al., 2007, Aparna et  
96 al., 2009). However, the process through which rice senses the cell wall damage caused by  
97 LipA and further activates immune responses is not clear.

98 In this study, transcriptome analysis was initially performed to identify gene expression  
99 changes that occur during LipA induced immune responses in rice. An enhanced transcript  
100 level of a wall-associated kinase like gene, *OsWAKL21.2* was observed after treatment of rice  
101 leaves with either purified LipA or the pathogen, *Xoo*, but not after treatment with a LipA  
102 mutant of *Xoo*. Sequence alignment and biochemical studies indicate that *OsWAKL21.2* is a  
103 dual function receptor kinase that has an *in vitro* kinase as well as a GC activity.  
104 *OsWAKL21.2* is a key component of signaling involved in LipA induced immunity as its  
105 downregulation leads to attenuation of LipA induced immune response. Overexpression of  
106 *OsWAKL21.2* in rice and ectopic expression in Arabidopsis induces plant defence response  
107 and confers enhanced tolerance to subsequent bacterial infection. However, we have  
108 observed that the mode of action of the receptor is dissimilar in rice and Arabidopsis. Our  
109 results suggest that *OsWAKL21.2* requires its kinase activity to induce immune response in  
110 rice, whereas, in Arabidopsis, it requires GC activity.

## 111 **Results:**

### 112 **Expression of *OsWAKL21.2* was enhanced after treatment of rice leaves either with** 113 **LipA or *Xoo***

114 In order to identify rice functions that are potentially involved in early stages of LipA  
115 induced immune responses, we performed transcriptome analysis of rice leaves after 30  
116 minutes and 2hr of infiltration with LipA. After 30 minutes, no gene was significantly altered  
117 while 78 genes (74 unique set of genes) were differentially expressed (68up, 10 down)  
118 (FC>1.5 fold) after 2hr of LipA treatment (Supplemental Fig. S1A, Supplemental Table S1).  
119 This includes genes that might have roles in signaling, defence responses or in  
120 transcription/translation (Supplemental Fig. S1B). When compared with a previous  
121 microarray (Ranjan et al., 2015) performed after 12hr of LipA treatment, we observed 38 of  
122 these 78 genes are differentially expressed (37up, 1 down) at both time points (Fig. 1A,  
123 Supplemental Table S2). We compared with a publicly available microarray dataset that was  
124 performed 24hr after treatment of rice leaves with various *Xanthomonas oryzae* strains (GEO  
125 Acc. No. GSE36272) and observed that some of these 38 genes were commonly upregulated

126 following *Xanthomonas* treatment (Supplemental Table S3). The upregulation of six of these  
127 commonly upregulated genes was validated by qRT-PCR after treatment of rice leaves with  
128 either *Xoo* or LipA (Supplemental Fig. S1C). Three of the 37 genes that were most  
129 commonly upregulated after *Xanthomonas* treatments include a putative wall-associated  
130 receptor kinase like gene (*OsWAKL21*, LOC\_Os12g40419), a putative ubiquitin ligase  
131 (*OsPUB38*, LOC\_Os04g35680) and a putative fructose-bisphosphate aldolase  
132 (LOC\_Os08g02700) (Supplemental Table S3). Since the focus of this work was on the  
133 perception of cell wall damage in rice plants, we decided to explore the function of wall-  
134 associated receptor kinase *OsWAKL21*.

135 *OsWAKL21* has three splice variants [*OsWAKL21.1* (LOC\_Os12g40419.1), *OsWAKL21.2*  
136 (LOC\_Os12g40419.2) and *OsWAKL21.3* (LOC\_Os12g40419.3)] (Fig. 1B). qRT-PCR  
137 analyses indicate that the second splice variant (*OsWAKL21.2*) is mainly upregulated in rice  
138 leaves after either LipA or *Xoo* treatment (Fig. 1C). Interestingly, treatment of rice leaves  
139 with LipA mutant of *Xoo* did not enhance expression of *OsWAKL21.2* while introduction of a  
140 LipA complementing clone into the LipA mutant restores the ability to enhance expression of  
141 *OsWAKL21.2* (Fig. 1D).

#### 142 **Overexpression of *OsWAKL21.2* in rice mimics LipA induced immune responses**

143 Treatment of rice tissue with LipA induces immune responses such as callose deposition,  
144 enhanced expression of defence related genes, activation of JA pathway and enhanced  
145 tolerance against subsequent *Xoo* infection (Jha et al., 2007, Ranjan et al., 2015).  
146 Agrobacterium mediated transient overexpression of *OsWAKL21.2* in young rice leaves  
147 significantly induces callose deposition which is comparable to callose deposition induced by  
148 LipA treatment (Fig. 2A,B). Transient overexpression of *OsWAKL21.2* in rice leaves also  
149 enhances tolerance against subsequent *Xoo* infection leading to reduced lesion length caused  
150 by *Xoo* which is also observed following treatment with LipA (Fig. 2C, Supplemental Fig.  
151 S2A). The overexpression of *OsWAKL21.2* was confirmed by qRT-PCR and Western blot  
152 analysis (Supplemental Fig. S2B,C).

153 Plant immune responses are known to be modulated via the expression of defence-related  
154 genes. Therefore, we tested the expression of some key defence-related genes of rice after the  
155 transient overexpression of *OsWAKL21.2* in mid-veinal regions of rice leaves. *OsWAKL21.2*  
156 overexpression in rice enhances expression of three pathogenesis-related genes (*OsPRIa*,  
157 *OsPR10/OsPBZ14* and *OsPR10a/OsPBZ1*), a somatic embryogenesis receptor kinase

158 (*OsSERK2*) and a phenylalanine ammonia lyase (*OsPAL3*) (Fig. 2D). We also tested  
159 expression of 10 genes that are upregulated following LipA/*Xoo* treatment (Supplemental  
160 Table S3) in microarray and observed seven of these ten genes are also significantly  
161 upregulated following overexpression of *OsWAKL21.2* in rice (Supplemental Fig. S2D).  
162 These results indicate that *Agrobacterium*-mediated transient overexpression of *OsWAKL21.2*  
163 in rice leaves mimics LipA treatment.

### 164 **Transient downregulation of *OsWAKL21.2* attenuates LipA induced immune responses** 165 **in rice**

166 We subsequently assessed the effect of transient knockdown of *OsWAKL21.2* by Virus-  
167 induced gene silencing (VIGS) on LipA induced immune responses. It was observed that the  
168 downregulation was not retained by all leaves for a long time which was also observed  
169 previously using this vector system (Kant and Dasgupta, 2017). So, an alternative approach  
170 was used for assessment of callose deposition in RNAi lines after LipA treatment  
171 (Supplemental Fig. S3). We categorized the leaf samples into three classes based on the  
172 amount of callose deposition as low (<30 deposits/leaf), medium (~30-80 deposits/leaf) or  
173 high (>80 deposits/leaf) (Fig. 3A). Following LipA treatment, about 30-40% of the leaf  
174 samples showed high callose deposition, 10-15% showed low callose deposition while the  
175 rest of them (about 50%) showed a medium level of callose deposition (Fig. 3B). A similar  
176 ratio was observed if the seedlings were previously treated with VIGS-EV (Fig. 3C). The  
177 number of leaves showing low callose deposition significantly increased to more than 50% in  
178 WAKL-RNAi lines (WRI 1-300, WRI 450-600 and WRI 1-600 correspond to the fragment of  
179 *OsWAKL21.2* that was used for downregulation) while there was a reduction in the leaves  
180 that showed high or medium callose deposition (Fig. 3C). In RNAi lines, the leaves that show  
181 low callose deposition following LipA treatment also showed significantly lower  
182 transcript/protein level of *OsWAKL21.2* which was not observed in the leaves that showed  
183 high callose deposition (Fig. 3D, Supplemental Fig. S4A).

184 Since downregulation of *OsWAKL21.2* attenuated LipA induced callose deposition, we  
185 decided to test its effect on LipA induced tolerance towards *Xoo*. VIGS mediated  
186 downregulation of *OsWAKL21.2* in rice mid-vein attenuates LipA induced tolerance against  
187 subsequent *Xoo* infection (Fig. 3E, Supplemental Fig. S4B). qRT-PCR and Western blotting  
188 studies using anti-*OsWAKL21* antibodies indicated the downregulation of *OsWAKL21.2* in  
189 the mid vein following VIGS mediated *OsWAKL21.2* downregulation (Fig. 3F, Supplemental

190 Fig. S4C). There was slight but usually non-significant reduction on transcript level of other  
191 splice variants and no significant difference was observed in transcript level of other  
192 predicted off-target genes (Supplemental Fig. S5). This suggests that optimal expression of  
193 *OsWAKL21.2* in rice leaves is required for LipA induced tolerance against *Xoo*.

#### 194 **Ectopic expression of *OsWAKL21.2* in transgenic Arabidopsis lines induces plant** 195 **immune responses**

196 In order to determine whether expression of *OsWAKL21.2* would activate immune responses  
197 in other plants, we generated stable Arabidopsis transgenic lines expressing *OsWAKL21.2*  
198 under a 17- $\beta$ -estradiol (Est) inducible promoter. Expression of *OsWAKL21.2* in transgenic  
199 lines was examined after treatment with the inducer (Est) through qRT-PCR and Western  
200 blotting (Supplemental Fig. S6A,B). We observed that ectopic expression of *OsWAKL21.2* in  
201 Arabidopsis results in an enhanced callose deposition (Fig. 4A,B), enhanced tolerance against  
202 subsequent *Pseudomonas syringae* pv. *tomato* DC3000 (*Pst* DC3000) infection and  
203 reduction in *in planta* growth of *Pst* DC3000 (Fig. 4C). In Arabidopsis, the Salicylic acid  
204 (SA) and Jasmonic acid (JA) pathways are widely known to be involved in immune  
205 responses. We examined the expression of key genes linked to these two pathways in  
206 Arabidopsis transgenic lines. The ectopic expression of *OsWAKL21.2* in Arabidopsis resulted  
207 in a significant increase in the transcript levels of key SA pathway-related genes (*AtPR2*,  
208 *AtPR5*, and *AtWRKY33*) and *AtGSL5*, a major callose synthase of Arabidopsis (Fig. 4D)  
209 (Jacobs et al., 2003, Janda and Ruelland, 2015) while the transcript level of the key JA  
210 responsive gene *AtPDF1.2* was decreased. Overall, this data implies that ectopic expression  
211 of *OsWAKL21.2* in Arabidopsis, enhances callose deposition, enhances expression of SA  
212 pathway related genes, and in addition, enhances tolerance against subsequent *Pst* DC3000  
213 infection.

#### 214 ***OsWAKL21.2* is a membrane localizing moonlighting receptor kinase having *in vitro*** 215 **kinase and guanylate cyclase (GC) activities**

216 Sequence analyses of *OsWAKL21.2* indicated that it is a receptor-like serine/threonine kinase  
217 that accommodates an N-terminal extracellular galacturonan binding domain (GBD), an  
218 epidermal growth factor (EGF) like repeat and an intracellular C-terminal kinase domain,  
219 resembling to other known wall-associated kinases (Fig. 5A). The analyses of *OsWAKL21.2*  
220 also revealed the presence of a putative GC motif (from residue 569-585) inside the kinase  
221 domain (Supplemental Fig. S7A,B) (Xu et al., 2018). Enhanced GFP (EGFP) tagged

222 recombinant OsWAKL21.2:EGFP localized to the cell membrane in onion epidermal cell  
223 indicating that it is a membrane bound receptor (Fig. 5B).

224 The biochemical characterization was performed by cloning the intracellular kinase domain  
225 of OsWAKL21.2 (OsWAKL21<sub>376-725</sub>) with an N-terminal 6x His tag and expressing it in *E.*  
226 *coli*. The purified cytoplasmic domain of OsWAKL21.2 showed an autophosphorylation  
227 activity when incubated with  $\gamma$ -<sup>32</sup>P-ATP indicating that it is an active kinase (Fig. 5C). For  
228 the guanylate cyclase activity, the same purified protein was incubated with GTP and cGMP  
229 was detected by qualitative and quantitative assays. cGMP was detected only when GTP was  
230 incubated with purified OsWAKL21<sub>376-725</sub> (Fig. 5D, Supplemental Fig. S7C). The rate of  
231 cGMP synthesis was 2.1±0.75 pM/μg protein/hr (Fig. 5D) which is comparable to other  
232 known plant GCs such as AtPEPR1, AtPSKR1 and AtWAKL10 (Meier et al., 2010, Qi et al.,  
233 2010, Kwezi et al., 2011). The biochemical analyses strongly suggests that OsWAKL21.2 is a  
234 dual-function enzyme having kinase and GC activity.

### 235 **Kinase activity of OsWAKL21.2 is essential for induction of immune responses in rice** 236 **but not in Arabidopsis**

237 Considering that OsWAKL21.2 is a receptor kinase, we hypothesized that kinase activity of  
238 the protein would be required for the induction of immune responses. Based on homology  
239 with other plant receptor kinases, we mutated four active site residues (K407, D504, T542,  
240 T547) to alanine and generated a kinase-deficient mutant (OsWAKL21.2-kinase deficient or  
241 *OsWAKL21.2*-kd). Purified kinase domain of OsWAKL21.2-kd had almost lost kinase  
242 activity but it retains GC activity (Supplemental Fig. S8A,B,C). Furthermore, we observed  
243 that *Agrobacterium*-mediated transient overexpression of the full-length *OsWAKL21.2*-kd in  
244 rice leaves did not induce rice immune responses such as callose deposition, enhanced  
245 tolerance against *Xoo* or increased expression of key defence-related genes (Fig. 6A,B,C, and  
246 Supplemental Fig. S9A,B). This indicates that the kinase activity of OsWAKL21.2 is  
247 required for induction of immune responses in rice.

248 In order to further investigate the role of the kinase activity of OsWAKL21.2 in the induction  
249 of plant immune responses, we generated transgenic Arabidopsis lines expressing  
250 *OsWAKL21.2*-kd. Interestingly, we observed that the ectopic expression of *OsWAKL21.2*-kd  
251 in Arabidopsis caused an increase in callose deposition (Fig. 6D, Supplemental Fig. S9C,D).  
252 Similar results were observed in four different transgenic lines. In Arabidopsis, the ectopic  
253 expression of *OsWAKL21.2*-kd showed enhanced tolerance towards *Pst* DC3000 and also



254 changed the expression of defence-related genes in a similar pattern as *OsWAKL21.2* (Fig.  
255 6E,F). As mentioned above, this mutant did not induce immune responses in rice, indicating  
256 that the kinase activity of *OsWAKL21.2* is vital for the induction of immune responses in rice  
257 but not in Arabidopsis.

### 258 **GC activity of *OsWAKL21.2* is required for induction of immune responses in** 259 **Arabidopsis but not in rice**

260 Owing to the fact that the kinase-deficient mutant of *OsWAKL21.2* induced immune  
261 responses in Arabidopsis, we decided to investigate whether the GC activity of  
262 *OsWAKL21.2* might have role in induction of immune responses in Arabidopsis. In order to  
263 test this hypothesis, we initially induced the expression of *OsWAKL21.2* in Arabidopsis in the  
264 presence of a GC inhibitor LY83583 and observed that the GC inhibitor attenuates  
265 *OsWAKL21.2* and *OsWAKL21.2*-kd induced callose deposition in Arabidopsis (Supplemental  
266 Fig. S10). In order to confirm this, we generated a mutant of *OsWAKL21.2* that lacked the  
267 GC activity (*OsWAKL21.2*-GC Deficient or *OsWAKL21.2*-gcd) but retained the kinase  
268 activity (Supplemental Fig. S8A,B,C) (Ma et al., 2012). Ectopic expression of *OsWAKL21.2*-  
269 gcd did not induce either callose deposition or enhanced tolerance towards *Pst* DC3000 (Fig.  
270 7A,B, and Supplemental Fig. S9C,D). Furthermore, *OsWAKL21.2*-gcd failed to significantly  
271 alter the expression of most of the defence-related genes that are differentially regulated by  
272 *OsWAKL21.2* in Arabidopsis (Fig. 7C). Ectopic expression of *OsWAKL21.2* in Arabidopsis  
273 leaves also enhances *in planta* cGMP level which was not observed when *OsWAKL21.2*-gcd  
274 was expressed in transgenic Arabidopsis plants (Supplemental Fig. S11A,B,C). However,  
275 transient overexpression of *OsWAKL21.2*-gcd induces immune responses in rice that were  
276 similar to the ones induced by the wild-type *OsWAKL21.2* (Fig. 7D,E,F, Supplemental Fig.  
277 S9A,B). These observations clearly indicated that the GC activity of *OsWAKL21.2* is  
278 essential for induction of immune responses in Arabidopsis but not in rice.

### 279 ***OsWAKL21.2* possibly induces the JA pathway in rice while it activates SA pathway in** 280 **Arabidopsis**

281 The results in this study indicated that kinase activity of *OsWAKL21.2* is required to induce  
282 rice immune responses and that the GC activity is required for induction of Arabidopsis  
283 immune responses. Our previous report indicated that the JA pathway is activated in rice  
284 leaves after treatment with LipA (Ranjan et al., 2015). We selected a subset of ten genes that  
285 were earlier predicted to be associated with the JA pathway in rice and were found to be

286 upregulated after 12hr of LipA infiltration (Ranjan et al., 2015). We tested the expression of  
287 these 10 genes and observed that 8 out of 10 genes showed significant upregulation after  
288 *OsWAKL21.2* overexpression (Fig. 8A). This indicates that overexpression of *OsWAKL21.2*  
289 in rice enhances expression of JA pathway related genes.

290 The results above (Fig. 4D) suggested that expression of SA related genes was enhanced after  
291 ectopic expression of *OsWAKL21.2* in Arabidopsis. We further tested the expression of some  
292 more SA pathway related Arabidopsis genes (*AtSID2*, *AtCBP60g*, *AtSARD1*, *AtSH3*, *AtNPR3*  
293 and *AtWRKY38*) after ectopic expression of *OsWAKL21.2* and observed significantly  
294 enhanced expression of these genes (Fig. 8B). In order to validate the role of the SA pathway  
295 in *OsWAKL21.2* induced immune responses in Arabidopsis, we made the crosses between  
296 *OsWAKL21.2* transgenic lines with *NahG* transgenic lines that do not accumulate SA  
297 (Delaney et al., 1994). Transgenic offspring lines that express both *OsWAKL21.2* and *NahG*  
298 did not show enhanced callose deposition while sister lines that expressed only *OsWAKL21.2*  
299 showed enhanced callose deposition after treatment with estradiol (Fig. 8C, Supplemental  
300 Fig. S12). This observation indicated that *OsWAKL21.2* induces immune responses in  
301 Arabidopsis via activation of the SA pathway.

302

### 303 **Discussion:**

304 CWDEs are important virulence factors secreted by microbial plant pathogens. *Xoo* secretes  
305 numerous CWDEs to degrade the rice cell wall and treatment of rice with *Xoo* secreted  
306 purified CWDEs such as Cellulase A (ClsA), Cellobiosidase (CbsA) and Lipase/esterase  
307 (LipA) leads to activation of plant immune responses (Jha et al., 2007). Earlier we have  
308 shown that the biochemical activity of LipA is required for the induction of rice immune  
309 responses (Aparna et al., 2009). This indicates that the rice plant is capable of recognizing  
310 cell wall degradation products as DAMPs and further induce immune responses. The  
311 molecular players involved in the perception of cell wall damage caused by CWDEs in rice is  
312 yet to be deciphered. To discern the functions involved in LipA induced immune responses,  
313 we performed transcriptome analyses at various time points following LipA treatment.  
314 Comparison with online available microarray data indicates a handful of genes that are  
315 commonly upregulated following LipA or *Xoo* treatment. One such gene was the second  
316 splice variant of a rice wall-associated kinase-like gene 21 (*OsWAKL21.2*). The wall-  
317 associated kinase (WAK) is the only gene family known to recognize plant cell wall-derived

318 DAMPs (Kohorn, 2015). Our study suggests that the expression of *OsWAKL21.2* is enhanced  
319 after treatment of rice leaves with either LipA or *Xoo* but not after treatment with a LipA  
320 mutant of *Xoo*. This indicates that the increase in *OsWAKL21.2* expression after *Xoo*  
321 treatment is specifically because of the presence of LipA in *Xoo*. We also observed that it is a  
322 membrane localized receptor kinase having *in vitro* kinase and GC activity.

323 Downregulation of some WAK gene family members in rice such as *OsWAK14*, *OsWAK91*,  
324 *OsWAK92* or *Xa4-WAK* have been reported to enhance the susceptibility of rice plants  
325 towards subsequent infection (Delteil et al., 2016, Hu et al., 2017). We downregulated the  
326 expression of *OsWAKL21.2* in rice leaves using VIGS. Although downregulation of  
327 *OsWAKL21.2* did not alter susceptibility against *Xoo*, it attenuated LipA induced tolerance to  
328 *Xoo* and callose deposition in rice indicating that it is a key intermediate of signaling  
329 activated after LipA treatment. Since optimal expression of *OsWAKL21.2* is essential for  
330 LipA induced immune responses, it might be an upstream component in signalling activated  
331 following LipA treatment.

332 Treatment of rice leaves with LipA leads to callose deposition, activation of JA pathway,  
333 enhanced expression of some defence related genes and enhanced tolerance against  
334 subsequent *Xoo* infection (Jha et al., 2007, Ranjan et al., 2015). Callose deposition is a  
335 hallmark of the immune response that is observed after treatment of the plant tissue with  
336 CWDEs (including LipA) or DAMPs (Jha et al., 2007, Galletti et al., 2008). We also  
337 observed that the overexpression of *OsWAKL21.2* in rice and ectopic expression in  
338 Arabidopsis leaves leads to the fortification of the cell wall in the form of callose deposition.  
339 Activation of the immune response leads to an increased tolerance towards subsequent  
340 infection in plants. We also observed that *OsWAKL21.2* induced immune responses lead to  
341 enhanced tolerance against subsequent bacterial infection in rice and Arabidopsis.  
342 Overexpression of several other WAKs such as *OsWAK1* (Li et al., 2009), *OsWAK25*  
343 (Harkenrider et al., 2016), *OsWAK14*, *OsWAK91* or *OsWAK92* (Delteil et al., 2016), *AtWAK2*  
344 (Kohorn et al., 2009), *AtWAK1* (Brutus et al., 2010), and *Ta-WAKL4* (Saintenac et al., 2018)  
345 has been reported to enhance tolerance towards subsequent infections in different plant  
346 species. Immune responses are usually correlated with enhanced expression of defence-  
347 related genes. The overexpression of *OsWAKL21.2* in the mid-vein of rice leaves enhanced  
348 the expression of five defence-related and LipA responsive genes. The key defence-related  
349 genes upregulated by *OsWAKL21.2* overexpression include *OsPRIa* (Park et al., 2008),  
350 *OsPRI0a* (Bai et al., 2011), *OsPRI0* (Harkenrider et al., 2016), *OsSERK2* (Chen et al., 2014)

351 and *OsPAL3* (Chen et al., 2018) which are well categorized as defence-related genes  
352 implicated in tolerance against *Xoo*. Interestingly, four of these five key defence genes  
353 (except *OsPRIa*) that are upregulated by *OsWAKL21.2* overexpression are also upregulated  
354 after 12hr of LipA treatment in a microarray that was earlier done in our lab (Ranjan et al.,  
355 2015). Overexpression of *OsWAKL21.2* also enhances the expression of most of the tested  
356 LipA responsive genes (7/10) and most of the tested JA pathway related LipA responsive  
357 genes (8/10) indicating that the overexpression of *OsWAKL21.2* partially mimics LipA  
358 treatment condition. These results establish that the overexpression of *OsWAKL21.2* in rice  
359 mimics the LipA treatment indicating *OsWAKL21.2* could be a major upstream component in  
360 the signaling process that is activated after cell wall damage caused by LipA.

361 Ectopic expression of *OsWAKL21.2* leads to enhanced expression of the SA responsive genes  
362 such as *AtPR2*, *AtPR5* and *AtWRKY33* and downregulation of the JA responsive gene,  
363 *AtPDF1.2* indicating that *OsWAKL21.2* likely activates the SA pathway in Arabidopsis. We  
364 observed enhanced expression of several other SA biosynthesis-, regulation- and response-  
365 related genes in Arabidopsis (*AtSID2*, *AtSARD1*, *AtCBP60G*, *AtNPR3*, *AtWRKY33*,  
366 *AtWRKY38* and *AtSH3*) following *OsWAKL21.2* ectopic expression (Janda and Ruelland,  
367 2015). We also found that the transgenic plants expressing *OsWAKL21.2* and *NahG* together  
368 did not show callose deposition, demonstrating that SA accumulation is required for  
369 *OsWAKL21.2* induced immune response in Arabidopsis. These outcomes also explain the  
370 enhanced tolerance towards *Pst* DC3000, as an activation of the SA pathway in Arabidopsis  
371 leads to increased tolerance towards *Pst* DC3000 (Xin and He, 2013). Activation of SA  
372 pathway in Arabidopsis enhances expression of biotic stress-responsive callose synthase  
373 *AtGSL5* (Dong et al., 2008) which was also upregulated following ectopic expression of  
374 *OsWAKL21.2*. The results indicate that *OsWAKL21.2* when expressed ectopically in  
375 Arabidopsis acts as a defence gene and activates SA pathway-mediated immune responses.  
376 Some members of the WAK gene family in Arabidopsis such as *AtWAK1*, *AtWAK2*,  
377 *AtWAK3*, *AtWAK5* and *AtWAKL10* are known as SA responsive genes as treatment with SA  
378 leads to the enhanced expression of these genes indicating correlation of SA pathway and  
379 WAKs in Arabidopsis (He et al., 1998, He et al., 1999, Meier et al., 2010).

380 Ligand binding onto receptor kinases triggers phosphorylation that is further conveyed  
381 downstream via phosphorylation by/of kinases and their targets (Macho and Zipfel, 2014).  
382 Few receptor kinases such as *AtBRI1*, *AtPSKR1*, *AtPEPR1*, *AtWAKL10* and *HpPEPR1* are  
383 also known to possess dual enzymatic activity i.e. they possess GC activity along with kinase

384 activity (Meier et al., 2010, Ma et al., 2012, Swiezawska et al., 2015, Gehring and Turek,  
385 2017, Swiezawska et al., 2017). OsWAKL21.2 also possess such dual activity which is  
386 comparable with other plant GCs. Treatment with a GC inhibitor and mutations in active site  
387 residues of the GC motif showed that the GC activity of OsWAKL21.2 is required to induce  
388 immune responses in Arabidopsis but not in rice. GCs convert GTP to cGMP which acts as a  
389 secondary signaling molecule (Gehring and Turek, 2017). Overexpression of *AtBRI1*,  
390 *AtPSKR1* and *AtPEPR1* (having GC activity) in Arabidopsis leads to a partial increase in  
391 cytoplasmic cGMP concentrations (Gehring and Turek, 2017) which was also observed  
392 following ectopic expression of *OsWAKL21.2* in Arabidopsis. Some of the moonlighting  
393 kinases such as *AtPEPR1*, *AtBRI1* and *AtPSKR1* are already known for their direct or  
394 modulatory role in Arabidopsis immune responses (Igarashi et al., 2012, Lozano-Durán and  
395 Zipfel, 2015). *AtPEPR1* is receptor of DAMP (Pep's) and it's GC activity is required for  
396 activation of immune responses (Ma et al., 2012). *AtWAKL10* has also been predicted as a  
397 defence-related gene that belong to similar gene family as *OsWAKL21.2*. These observations  
398 testify the possible involvement of GCs in Arabidopsis immune response. We have observed  
399 that in rice, OsWAKL21.2 requires the kinase activity to induce immunity, whereas, in  
400 Arabidopsis, it requires the GC activity. This does not rule out the possible role of GC  
401 activity of OsWAKL21 in rice as it might be involved in some other functions not studied  
402 here.

403 CWDEs secreted by *Xoo* cause degradation of the rice cell wall that leads to the release of  
404 cell wall derived DAMPs. These DAMPs, in turn, induce rice immune responses, but the  
405 mechanisms by which these DAMPs are perceived and recognized are obscure. Employing a  
406 variety of analyses, we have found that the rice receptor kinase *OsWAKL21.2* is required for  
407 the activation of plant immune responses post-LipA treatment. This suggests that  
408 *OsWAKL21.2* could be either a receptor or a co-receptor for cell wall damage and possibly  
409 the first DAMP receptor identified in rice. Overexpression of *OsWAKL21.2* in plants induces  
410 immune responses and enhances tolerance towards hemibiotrophic pathogens. We observed  
411 that this receptor kinase is a moonlighting kinase having *in vitro* GC activity along with  
412 kinase activity making it one of the few moonlighting kinases known in plants and the first  
413 one in rice. An interesting observation about *OsWAKL21.2* is that for the induction of  
414 immune responses in rice, the kinase activity is required, but in Arabidopsis, the GC activity  
415 is needed. Fig. 8D represents a mechanistic model of the role of OsWAKL21.2 in the  
416 induction of immune responses in rice and Arabidopsis. Future studies would be aimed at

417 identifying interacting partners of OsWAKL21.2 that are involved in elaboration of LipA  
418 induced immune responses. Furthermore, the possibility of using this gene to provide  
419 enhanced tolerance to bacterial pathogens in a variety of crops including monocots and dicots  
420 can be explored.

## 421 **Materials and Methods:**

### 422 **Plant materials and growth conditions**

423 Rice (*Oryza sativa* ssp. *indica*) variety TN1 (Taichung native 1) which is susceptible to  
424 *Xanthomonas oryzae* pv. *oryzae* (*Xoo*) was used for plant experiments. All the rice  
425 experiments were performed in either the growth chamber (12hr Day//Night) or greenhouse  
426 at 28°C. *Arabidopsis thaliana* ecotype Columbia (Col-0) and *NahG* lines were used for  
427 *Arabidopsis* experiments. Transgenic lines were generated using the floral dip method  
428 (Clough and Bent, 1998). Transgenic plants were selected by adding hygromycin and/or  
429 kanamycin (*NahG* lines) to the final concentration of 20µg/ml or 50µg/ml respectively.  
430 Plants were maintained in growth chamber at 22°C day and 18°C night temperature at about  
431 70% humidity and with 12hr day/night cycle. Leaves of 4-5-week-old plants that are in  
432 rosette state were used for experiments.

### 433 **Bacterial cultures**

434 *Xoo* wild type strain BXO43 (lab isolate) was used as a rice pathogen. The LipA mutant  
435 (BXO2001) of *Xoo* (BXO43) and its complemented strain (BXO2008) was also used in this  
436 study (Rajeshwari et al., 2005). *Pseudomonas syringae* pv. *tomato* DC3000 (*Pst* DC3000)  
437 was used as an *Arabidopsis* pathogen. Transient transformation in rice and floral dip of  
438 *Arabidopsis* was performed using *Agrobacterium tumefaciens* strain LBA4404. *E. coli* BL21-  
439 AI was used for recombinant protein expression for biochemical assays.

### 440 **LipA purification from *Xoo* culture supernatant**

441 *Xoo* BXO2008, a LipA overproducing strain derived from BXO2001 was used for LipA  
442 overproduction and purification and LipA was purified by the protocol described previously  
443 (Aparna et al., 2007). The purity and activity of the enzyme was tested by running on a SDS-  
444 PAGE gel and activity on tributyrin containing plates respectively.

### 445 **Microarray analysis**

446 The leaf treatment and microarray analysis was performed as described previously (Ranjan et  
447 al., 2015). RNA was isolated from 25-30 leaves after 30min or 2hr of treatment either with  
448 LipA (0.5mg/ml) or buffer. Processed data and ‘.cel’ files were also submitted to gene  
449 expression omnibus (GEO-NCBI, Acc. No. GSE53940). RMA and PLIER16 algorithms were

450 used for analysis and probes showing significant differential expression ( $FC \geq 1.5$ -fold and  
451  $p < 0.05$ ) in both analyses were considered as differentially expressed genes.

#### 452 **Vector construction and site-directed mutagenesis**

453 Gateway™ cloning technology was used for cloning. *OsWAKL21.2* was amplified using rice  
454 cDNA and cloned into pENTR-D-TOPO (Invitrogen™). The gene was subcloned using LR  
455 clonase reaction (Invitrogen™) into pMDC7 plasmid (Curtis and Grossniklaus, 2003) for  
456 plant expression studies and in pH7FWG2 plasmid (Karimi et al., 2002) for localization  
457 experiments. In pMDC7, the target gene sequence is cloned downstream to XVE promoter,  
458 which is 17- $\beta$ -estradiol inducible. 20 $\mu$ M of 17- $\beta$ -estradiol (Sigma Aldrich) was used in all  
459 overexpression studies as an inducer while 0.1% DMSO was used as a control (uninduced  
460 condition). Kinase domain *OsWAKL21*<sub>376-725</sub> was cloned into bacterial expression vector  
461 pDEST17 (Invitrogen) and transformed into *E. coli* BL21-AI for recombinant protein  
462 expression. The constructs in pENTR-D-TOPO were used for site-directed mutagenesis  
463 (Zheng et al., 2004). The mutant versions were then transferred into desired destination  
464 vectors using LR clonase reaction. All the clones and mutations were confirmed using Sanger  
465 sequencing. All the plant expression constructs were introduced into *Agrobacterium*  
466 *tumefaciens* strain LBA4404. LBA4404:XVE<sub>pro</sub>:*OsWAKL21.2*,  
467 LBA4404:XVE<sub>pro</sub>:*OsWAKL21.2*-kd and LBA4404:XVE<sub>pro</sub>:*OsWAKL21.2*-gcd were used for  
468 transient transformation in rice and for generation of Arabidopsis transgenic lines.

#### 469 **Callose deposition assay in rice and Arabidopsis**

470 For callose deposition assay in rice, 12-14 days old leaves were used for *Agrobacterium*-  
471 mediated transient transformation (Jha et al., 2010, Pillai et al., 2018). The suspension was  
472 infiltrated in third rice leaf using a needleless 1ml syringe with inducer [20 $\mu$ M 17- $\beta$ -estradiol;  
473 (Est), Sigma-Aldrich] or control (0.1% DMSO). Leaves collected for callose deposition were  
474 stained with aniline blue according to Millet et al. (2010) (Millet et al., 2010). Callose  
475 deposition was visualized under blue light (excitation wavelength 365nm) in ECLIPSE Ni-E,  
476 epifluorescence microscope (Nikon, Japan) with 10X magnification. Eight images (~1mm<sup>2</sup>  
477 each) were captured from each leaf from the zone of infiltration and proximal region. The  
478 number of callose deposits in all eight images for a leaf was added to get callose deposition  
479 per leaf (per 8mm<sup>2</sup>). Average was calculated for 10-12 leaves for each treatment.

480 For callose deposition in Arabidopsis transgenic plants, similar size of rosette stage leaves  
481 were infiltrated either with 100 $\mu$ l of 0.1%DMSO or 20 $\mu$ M estradiol (inducer) using the  
482 needleless 1.0 ml syringe. After 12hr, leaves were collected and stained for callose deposition  
483 and observed under the microscope as mentioned above for rice. Nearly 40-50 images per

484 leaf were captured and the number of callose deposits in each image was added to get number  
485 of callose deposits in one leaf. For each sample average was calculated for 3 such leaves  
486 obtained from three separate plants.

#### 487 **Virulence assay in rice and Arabidopsis**

488 About 60 days old TN1 rice plants were used for infection of *Xoo*. For transient  
489 overexpression in rice mid-vein, 200 $\mu$ l actively growing Agrobacterium (LBA4404)  
490 resuspended in 10mM MES + 10mM MgCl<sub>2</sub> + 200 $\mu$ M acetosyringone (final OD 0.8) [either  
491 with (20 $\mu$ M 17- $\beta$ -estradiol) or without (0.1% DMSO) inducer] was injected using a 1.0 ml  
492 syringe. After 24hr, about 1cm above Agrobacterium injection site, the mid-veins of leaves  
493 were pin-pricked with needle touched to fresh *Xoo* colony. Lesion length caused by *Xoo* was  
494 measured after 10 days of *Xoo* infection.

495 *Pseudomonas syringae* pv. *tomato* (*Pst* DC3000) was used for infection in Arabidopsis  
496 leaves. Similar size leaves from five different rosette stage plants were infiltrated with either  
497 0.1% DMSO or 20 $\mu$ M estradiol. After 12hr, leaves were infected with actively growing  
498 culture of *Pst* DC3000 (Diluted to OD 0.02) by infiltration using a needleless 1.0 ml syringe.  
499 Colony forming unit (CFU) at 0dpi (days post infection) and 2dpi was calculated.

#### 500 **Downregulation of *OsWAKL21.2* using virus-induced gene silencing (VIGS)**

501 Virus-induced gene silencing was used for Agrobacterium-mediated transient downregulation  
502 of *OsWAKL21.2* in rice. Three RNAi constructs of different length from unique 5'-end of  
503 *OsWAKL21.2* were cloned in pRTBV-MVIGS (Purkayastha et al., 2010). Downregulation  
504 was performed with a modified protocol mentioned previously (Purkayastha et al., 2010,  
505 Kant and Dasgupta, 2017). For callose deposition studies, just germinated rice seedlings (1  
506 day old) were dipped in activated Agrobacterium culture (in 10mM MES+10mM  
507 MgCl<sub>2</sub>+200 $\mu$ M acetosyringone) for 24hr (Supplemental Fig. S3). 10 days after  
508 Agrobacterium treatment, the third leaf of each plant was infiltrated with LipA using a  
509 needleless syringe (0.5mg/ml) (at least 40 leaves for each Agrobacterial strain). After 16hr, a  
510 small piece (~1.5cm) of each leaf around the zone of infiltration was collected for callose  
511 deposition while the rest of the leaf piece was stored for transcript/protein quantification.  
512 Each leaf was collected separately for callose and transcript/protein quantification and  
513 labelled. Callose deposition was observed as mentioned above for callose deposition assay.  
514 Rest of the part of 4-5 leaves that showed either low or high callose deposition were pooled  
515 and RNA/protein was isolated from those pooled leaves for qRT-PCR or Western blotting.

516 For virulence assay after downregulation of *OsWAKL21.2*, mid-veins of 60 days old rice  
517 plants were injected with 200 $\mu$ l Agrobacterium containing the VIGS construct along with



518 either buffer or LipA (0.5mg/ml) (n>40). After 24hr, mid-veins of 10 leaves were collected  
519 (3cm each) for *OsWAKL21.2* transcript/protein quantification while remaining 20-30 leaves  
520 were infected with a freshly growing colony of *Xoo* as mentioned earlier. Lesion length  
521 caused by *Xoo* was measured after 10 days of infection.

#### 522 **Purification of recombinant protein and *in vitro* biochemical assays**

523 The recombinant kinase domain of *OsWAKL21.2*, *OsWAKL21.2*<sub>376-725</sub> with 6X-His tag was  
524 cloned, expressed and purified from *E. coli* BL21-AI. 50µg of purified recombinant protein  
525 was used for kinase or GC assay in a 50µl reaction. The purified protein was incubated with  
526 10µCi of [ $\gamma$ -<sup>32</sup>P] ATP in kinase assay buffer (50mM Tris (pH 7.5), 10mM MgCl<sub>2</sub>, 2mM  
527 MnCl<sub>2</sub>, 0.5mM CaCl<sub>2</sub>, 1mM DTT and 20mM ATP) for 1hr at room temperature (Li et al.,  
528 2009), run on 10% SDS-PAGE gel and gel was subsequently exposed to phosphoimager  
529 screen which was later scanned in phosphoimager (Personal molecular imager, Biorad)  
530 instrument.

531 GC assay was also performed from the same purified recombinant protein in GC assay buffer  
532 [50mM Tris (pH 7.5), 2mM MgCl<sub>2</sub>, 1mM MnCl<sub>2</sub>, 0.5mM CaCl<sub>2</sub>, 0.2mM NONOate (Sigma)]  
533 modified from the protocol described previously (Meier et al., 2010). The reaction was  
534 incubated at 37°C for either 1hr or 12hr. The 1hr reaction was used for quantitative analysis  
535 while 12hr reactions were used for qualitative analysis. cGMP produced after 1hr was  
536 quantified using cGMP enzyme immunoassay kit (Sigma-Aldrich, Cat. No- CG201)  
537 according to manufacturer's protocol and the data was analyzed using online tool  
538 'Elisaanalysis' (<https://elisaanalysis.com/app>). For qualitative analysis, the resultant product  
539 was blotted on nitrocellulose membrane (Amersham, Cat No. RPN203E) and dried in the  
540 laminar hood with UV on for 1hr. The nucleotides were further crosslinked to the membrane  
541 by keeping in UV transilluminator for 30min. The membrane was blocked, washed and  
542 further incubated with anti cGMP antibody (1:1000, Sigma-Aldrich, Cat. No- G4899) and  
543 processed as mentioned in Western blot section.

#### 544 **RNA isolation and gene expression analysis**

545 For qRT-PCR, RNA was isolated by the protocol of Sánchez et al. (2008) with some  
546 modifications (Oñate-Sánchez and Vicente-Carbajosa, 2008, Couto et al., 2015). For rice, 10-  
547 12 leaf pieces (or mid-vein pieces) were crushed together for each treatment unless  
548 mentioned otherwise. For Arabidopsis, three leaf pieces from separate plants were crushed  
549 together for each treatment. cDNA was made from 5µg of total RNA [RNA to cDNA  
550 EcoDry™ Premix (Oligo dT), (Clontech)] according to the manufacturer's protocol. qRT-  
551 PCR was performed with diluted cDNA using Power SYBR™ Green PCR Master Mix

552 (Thermo Fisher Scientific) in ViiA 7 Real-Time PCR System (Applied Biosystems). Relative  
553 expression was calculated in enzyme or 17- $\beta$ -estradiol treated leaves with respect to  
554 mock/control (buffer or 0.1% DMSO) treated leaves. The fold change was calculated using 2<sup>-  
555  $\Delta\Delta C_t$</sup>  method (Livak and Schmittgen, 2001). *OsActin1* and *AtActin2* were used as internal  
556 control for rice and Arabidopsis respectively. All the primers for qRT-PCR were designed  
557 using QuantPrime (Arvidsson et al., 2008).

#### 558 **Protein isolation and Western blotting**

559 For Western blot the protein was isolated from 10-12 leaf pieces of rice or three leaves of  
560 Arabidopsis using the protocol described previously with minor modifications (Rohila et al.,  
561 2006). 20 $\mu$ g of total protein was loaded in 10% SDS-PAGE gel for Western blot/Coomassie  
562 brilliant blue staining. The protein was transferred to PVDF membrane (Millipore) and  
563 processed for blotting. Anti OsWAKL21<sub>376-725</sub> antibodies were generated in the rabbit in our  
564 institute animal house facility and used in dilution of 1:100. HRP tagged anti-Rabbit IgG  
565 secondary antibody (Abcam) (dilution 1:50000) was used and the blot was visualized in  
566 chemidoc (Vilber Lourmat).

#### 567 **Localization of OsWAKL21.2**

568 The localization of OsWAKL21.2 was observed by transient transformation of onion peel  
569 cell as described previously (Sun et al., 2007). *OsWAKL21.2* was cloned into Gateway  
570 compatible vector pH7FWG2 (Karimi et al., 2002) and transformed in onion peel using  
571 *Agrobacterium*-mediated transient transformation. The GFP signal was visualized under GFP  
572 filter in ECLIPSE Ni-E, epifluorescence microscope (Nikon, Japan).

#### 573 **cGMP quantification**

574 cGMP was quantified in leaves of rosette stage transgenic Arabidopsis plants by the method  
575 used by, Dubovskaya et al. (2011), Nan et al. (2014) and Chen et al. (2018) with minor  
576 modifications (Dubovskaya et al., 2011, Nan et al., 2014, Chen et al., 2018). Six similar sized  
577 leaves (total approximate 200mg) were collected from different plants for untreated control  
578 (UT). 3-3 similar size leaves from three different plants were infiltrated either with 0.1%  
579 DMSO or 20 $\mu$ M estradiol. Two leaves from each plant (total 6 leaves, ~200mg) were  
580 collected for cGMP quantification while the third leaf was used for testing of expression of  
581 *OsWAKL21.2*. After 3hr of infiltration, leaves were collected and crushed in a fine powder  
582 using liquid nitrogen. The powder was resuspended in 2ml ice cold 6% (v/v) trichloroacetic  
583 acid (TCA) and was collected in the 5ml tube. After brief vortexing (10s), tubes were  
584 centrifuged twice at 1000g for 15min at 4°C and supernatant was collected each time in the  
585 5ml tube. The aqueous supernatant was washed 7-8 times with water-saturated diethyl ether.

586 The solvent was evaporated in cold vacuum centrifuge at 4°C (SCANVAC, CoolSafe).  
587 cGMP was quantified in the extract using cGMP enzyme immunoassay kit (Sigma-Aldrich,  
588 Cat. No- CG201) according to the manufacturer's protocol. Data were analyzed using the  
589 online tool Elisaanalysis (<https://elisaanalysis.com/app>).

#### 590 **Analyses of publicly available transcriptome data**

591 Rice microarray data performed after *Xanthomonas oryzae* treatment was obtained from  
592 GEO, NCBI (Acc. No. GSE36272). '.cel' files were downloaded, analyzed and processed  
593 using expression console (Affymetrix) using RMA based normalization. '.chp' files obtained  
594 after analysis were used in TAC software (Transcriptome analysis console v3.0, Affymetrix)  
595 for relative expression analysis. Genes that show FC  $\geq$  1.5-fold with  $p < 0.05$  were considered  
596 as differentially expressed.

#### 597 **Statistical analysis**

598 All experiments were independently performed at least thrice. All data represented here  
599 indicate mean  $\pm$  SE (standard error). The results of lesion length, callose deposition and  
600 bacterial growth in CFU were analysed by one-way ANOVA ( $p < 0.05$ ) followed by the  
601 Tukey-Kramer test. The results of qRT-PCR were analyzed by Student's *t*-test and the genes  
602 that show significantly altered expression ( $p < 0.05$ ) between control and treated were  
603 considered as differentially expressed.

#### 604 **Accession numbers**

605 The PLIER16 and RMA processed microarray data files generated and used in this  
606 experiment are submitted to gene expression omnibus (GEO)  
607 (<https://www.ncbi.nlm.nih.gov/geo/>) under the accession number GSE53940. Other publicly  
608 available microarray data used in our analysis was harvested from GEO under the accession  
609 numbers GSE49242 and GSE36272. Accession numbers of genes referred in this study are  
610 provided in supplemental table S5.

611

#### 612 **Acknowledgement:**

613 We thank Mr. Ramesh P. (CSIR-CCMB) for helping in analysing the microarray data. We  
614 thank Dr. Alok K. Sinha (DBT-NIPGR), Dr. Gopaljee Jha (DBT-NIPGR) and Dr. Puran  
615 Singh Sijwali (CSIR-CCMB) for their key suggestions in experiments. We also thank Dr.  
616 Subhadeep Chatterjee (DBT-CDFD) for providing *NahG* transgenic lines and *Pseudomonas*  
617 *syringae* DC3000 strain.

618

619

620

621

622

623 **Supplemental data:**

624 **Supplemental Table S1:** List of probe sets that show differential expression after 2hr of  
625 LipA treatment.

626 **Supplemental Table S2:** List of differentially expressed genes after 2hr and 12hr of LipA  
627 treatment.

628 **Supplemental Table S3:** Frequency of differentially expressed genes after LipA treatment in  
629 the microarray data performed after 24hr of *Xanthomonas oryzae* treatment in GEO  
630 submission GSE36272.

631 **Supplemental Table S4:** List of primers used in this study.

632 **Supplemental Table S5:** Accession numbers of the genes mentioned in this study.

633 **Supplemental Fig. S1:** Transcriptome profiling of rice leaves after treatment with LipA.

634 **Supplemental Fig. S2:** Overexpression of *OsWAKL21.2* induces rice immune responses.

635 **Supplemental Fig. S3:** Methodology for downregulation of *OsWAKL21.2* in rice seedlings  
636 using Virus Induced Gene Silencing (VIGS).

637 **Supplemental Fig. S4:** Transient downregulation of *OsWAKL21.2* in rice.

638 **Supplemental Fig. S5:** VIGS mediated transient downregulation of *OsWAKL21.2* does not  
639 have significant effect on expression of predicted off-targets genes.

640 **Supplemental Fig. S6:** qRT-PCR and Western blot validation for ectopically expressing  
641 *OsWAKL21.2* transgenic Arabidopsis plants.

642 **Supplemental Fig. S7:** Biochemical characterization of *OsWAKL21.2*.

643 **Supplemental Fig. S8:** Biochemical activities of purified kinase domain of mutant versions  
644 of *OsWAKL21.2*.

645 **Supplemental Fig. S9:** qRT-PCR and Western blot validation of expression of mutant  
646 versions of *OsWAKL21.2* by transient transformation in rice and ectopic expression in  
647 Arabidopsis transgenic lines.

648 **Supplemental Fig. S10:** Treatment with GC inhibitor attenuates *OsWAKL21.2* induced  
649 callose deposition in transgenic Arabidopsis leaves.

650 **Supplemental Fig. S11:** Ectopic expression of *OsWAKL21.2* in Arabidopsis enhances *in*  
651 *planta* cGMP level by its GC activity.

652 **Supplemental Figure S12:** Western blot validation of ectopic expression of *OsWAKL21.2* in  
653 Arabidopsis transgenic lines generated after crossing with *NahG* lines.

654

655

656 **Figure 1: Expression of *OsWAKL21.2* is enhanced in rice leaves after treatment with**  
657 **either LipA or *Xoo*.**

658 (A) Venn diagram indicating number of genes that are differentially expressed after 2hr and  
659 12hr of LipA treatment.

660 (B) Three splice variants of *OsWAKL21* as shown in Rice-MSU database.

661 (C) qRT-PCR analysis of the expression of all three splice variants of *OsWAKL21* after 2hr  
662 and 12hr of LipA treatment, and after 24hr of *Xoo* treatment in rice leaves. Asterisk (\*)  
663 represents significant difference in fold change with  $p < 0.05$  with respect to buffer treated  
664 leaves.

665 (D) qRT-PCR analysis of expression of *OsWAKL21.2* in rice leaves after 24hr of treatment  
666 with either *Xoo*, LipA mutant of *Xoo* (*Xoo* LipA-) or LipA complementing clone of *Xoo* (*Xoo*  
667 LipA-CC). a and b above the bars indicate significant difference with  $p < 0.05$ .

668 In C and D, 12-14 days old leaves were infiltrated with either LipA (0.5mg/ml) or *Xoo* (O.D.  
669 1.0). Each bar represents average value and error bar denotes standard error (SE) of at least  
670 three independent experiments. Relative expression was calculated in leaves treated with  
671 LipA or *Xoo* with respect to leaves treated with buffer. *OsActin1* was used as internal control  
672 for qRT-PCR. The relative fold change was calculated by using  $2^{-\Delta\Delta Ct}$  method.

673 **Figure 2: Overexpression of *OsWAKL21.2* in rice leaves induces plant immune**  
674 **responses.**

675 (A) Callose deposition in rice leaves after treatment with various Agrobacterium constructs or  
676 controls. The image shown is representative image of one viewing area for each category.  
677 Scale bar represents 100 $\mu$ m. The numbers denotes: 1-0.1% DMSO, 2-20 $\mu$ M  $\beta$ -estradiol (Est),  
678 3,4- Agrobacterium containing pMDC7 (Empty vector-EV) without (3) or with (4) inducer  
679 (Est), 5,6- Agrobacterium containing pMDC7::*OsWAKL21.2* without (5) or with (6) inducer  
680 (Est), 7-LipA.

681 (B) Quantification of callose deposition in rice leaves after treatment with various  
682 Agrobacterium constructs or controls. Bar diagram showing the quantification of number of  
683 callose deposits per area in rice leaves. Number of callose deposits in 8 such viewing areas  
684 (as shown in Fig. 2A) per leaf were considered. Each bar represents the average and error bar  
685 represents SE of 10-15 leaves per treatment in one set of experiment. Similar results were  
686 obtained in three independent experiments.

687 (C) Lesion length caused by *Xoo* in rice leaves when mid-vein of the leaves were previously  
688 treated with various Agrobacterium constructs or controls. Mid-veins of rice leaves of 60 day  
689 old plants were injected with either MQ, LipA or Agrobacterium carrying empty vector or  
690 *OsWAKL21.2* and also with (20 $\mu$ M  $\beta$ -estradiol) or without (0.1% DMSO) inducer. After  
691 24hr, the leaves were pin prick inoculated with *Xoo*, 1cm above the point of Agrobacterium

692 injection. Lesion length was measured after 10 days of infection of *Xoo* (Supplemental Fig.  
693 S2A). Each bar indicates average and error bar represents SE of >20 leaf per treatment in one  
694 set of experiment. Similar results were obtained in three independent experiments.

695 (D) Relative expression of key defence related genes after transient overexpression of  
696 *OsWAKL21.2* in rice leaves. Each bar represents average fold change and the error bars  
697 indicate SE in three independent experiments (n=12 in each experiment). For each gene,  
698 transcript level of uninduced condition (treatment with *Agrobacterium* carrying *OsWAKL21.2*  
699 with 0.1% DMSO) was considered as 1 and was compared to induced condition (treatment  
700 with *Agrobacterium* carrying *OsWAKL21.2* with 20 $\mu$ M estradiol). *OsActin1* was used as  
701 internal control for qRT-PCR. The relative fold change was calculated by using  $2^{-\Delta\Delta Ct}$   
702 method. Asterisk (\*) represents significant difference in fold change with p<0.05 with respect  
703 to uninduced condition.

704 In A and B, 12-14 days old rice leaves were infiltrated with either MQ, *Agrobacterium*  
705 carrying empty vector or vector containing *OsWAKL21.2* and also with (20 $\mu$ M  $\beta$ -estradiol) or  
706 without (0.1% DMSO) inducer. In B and C, a and b above the bars indicate significant  
707 difference with p<0.05. MQ (MilliQ or water) treatment indicate control without any  
708 *Agrobacterium* treatment. In A, B and C, Leaves treated with LipA were used as positive  
709 control.

710

711 **Figure 3: Downregulation of *OsWAKL21.2* attenuates LipA induced immune responses**  
712 **in rice.**

713 (A) Categorization of number of callose deposits in three different groups: low, medium and  
714 high. The image shown is representative image of one viewing area for each group. 8 such  
715 areas per leaf were viewed for categorization.

716 (B) Fraction of leaves showing low, medium or high callose deposition after LipA treatment.

717 (C) Fraction of leaves showing callose deposits post LipA infiltration that were previously  
718 treated with either MQ (mock treatment), *Agrobacterium* containing VIGS-EV or WAK-  
719 RNAi constructs [WAKL-RNAi 1-300 (WRi 1-300), WAKL-RNAi 451-600 (WRi 451-600  
720 or WAKL-RNAi 1-600 (WRi 1-600))] in 12-14 days old rice leaves.

721 (D) qRT-PCR analysis of *OsWAKL21.2* transcript levels in leaves showing either low or high  
722 callose deposits (H: High callose, L: Low callose). Each bar represents average fold change  
723 and error bar indicates SE observed in three biological replicates. For each sample, 4-5 leaves  
724 showing respective callose phenotype were used for RNA isolation. Transcript level in mock  
725 (MQ) treated leaves was considered as 1 and fold change in *Agrobacterium* treated leaves  
726 was calculated with respect to it.

727 (E) Lesion length caused by *Xoo* in mid-veins of 60 days old rice leaves that were pre-treated  
728 with either buffer and LipA alone or along with *Agrobacterium* strains [WAKL-RNAi 1-300  
729 (WRi 1-300) or WAKL-RNAi 1-600 (WRi 1-600)]. Each bar represents average lesion length  
730 and error bar show SE of at least 20 leaves in one experiment. Similar results were obtained  
731 in three independent experiments.

732 (F) Expression level of *OsWAKL21.2* in rice leaves after 24hr of injection with either buffer  
733 and LipA alone or along with *Agrobacterium* strains [WAKL-RNAi 1-300 (WRi 1-300) or  
734 WAKL-RNAi 1-600 (WRi 1-600)]. Each bar represents average of three independent  
735 experiments, n>10 in each experiment. Transcript level of buffer injected leaves was  
736 considered as 1 and fold change in *Agrobacterium* with Buffer/LipA treated leaves was

737 calculated with respect to it.  
738 In B, C, D and F, each bar represents the average and error bar denotes the SE of three  
739 different biological replicates. In B and C each bar denotes the ratio of leaves showing  
740 respective phenotype in at least 40 leaves. In C, D, E and F small letters (a, b and c) above the  
741 bars indicates significant difference with  $p < 0.05$ . In D and F, *OsActin1* was used as internal  
742 control for qRT-PCR and the relative fold change was calculated by using  $2^{-\Delta\Delta Ct}$  method.  
743

744 **Figure 4: Ectopic expression of *OsWAKL21.2* in Arabidopsis induces immune responses.**

745 (A) Callose deposition in leaves of wild type Columbia (Col-0) or *OsWAKL21.2* transgenic  
746 Arabidopsis lines following treatment with 20 $\mu$ M  $\beta$ -estradiol (inducer) or 0.1% DMSO  
747 (control). Numbers denote: 1,2- Col-0 treated with DMSO (1) or Est (2), 3,4- *OsWAKL21.2*  
748 transgenic line 7 treated with DMSO (3) or Est (4), 5,6- *OsWAKL21.2* transgenic line 14  
749 treated with DMSO (5) or Est (6).

750 (B) Quantification of number of callose deposits in wild type Col-0 and two different  
751 Arabidopsis *OsWAKL21.2* transgenic lines after treatment with control or inducer. Leaves  
752 were treated with either 20 $\mu$ M  $\beta$ -estradiol (inducer) or 0.1% DMSO (control). Each bar  
753 represents the average and error bar represents SE of three different leaves for each treatment  
754 in an experiment.

755 (C) Effect of ectopic expression of *OsWAKL21.2* on growth of *Pst* DC3000 after subsequent  
756 infection. Each bar represents average and error bar represents SE of five leaves for each  
757 treatment in an experiment.

758 (D) Effect of ectopic expression of *OsWAKL21.2* in transgenic Arabidopsis lines on the  
759 expression of SA or JA pathway responsive genes. Expression in 0.1% DMSO treated leaves  
760 was considered as 1 and relative expression in 20 $\mu$ M estradiol treated leaves was calculated  
761 with respect to it. Each bar represents the average of three independent experiments for each  
762 line. For each sample, RNA was isolated from 3 leaves for every treatment. *AtActin2* was  
763 used as internal control for qRT-PCR. The relative fold change was calculated by using  $2^{-\Delta\Delta Ct}$   
764 method

765 Transgenic or wild type plant leaves were treated with 0.1% DMSO (Control) or 20 $\mu$ M  
766 estradiol (inducer). 12hr later leaves were either collected for callose deposition or  
767 transcript/protein analysis or were infected with *Pst* DC3000. Similar results were obtained in  
768 three independent experiments for A, B and C. If the significant difference was observed,  
769 asterisk (\*) represents significant difference with  $p < 0.05$  with respect to uninduced condition.

770

771 **Figure 5: Biochemical characterization and localization of *OsWAKL21.2***

772 (A) Domain architecture of *OsWAKL21.2* using SMART tool ([http://smart.embl-  
773 heidelberg.de/](http://smart.embl-heidelberg.de/)) (SP: signal peptide, GUB: galacturonan binding domain, EGF: epidermal  
774 growth factor like repeat, TM: transmembrane region, Pkinase\_Tyr: kinase domain, GC:  
775 guanylate cyclase motif).

776 (B) *OsWAKL21.2*-EGFP localize on the cell membrane in onion peel after transient  
777 expression. *OsWAKL21.2*-EGFP was transiently transformed to onion peel cells using  
778 Agrobacterium and peels were visualized after 2 days under epifluorescence microscope. The  
779 experiment was repeated three times and similar results were obtained.

780 (C) Kinase assay: Kinase domain of *OsWAKL21* cloned and purified from *E. coli* show  
781 autophosphorylation activity. 50 $\mu$ g of affinity purified recombinant protein was used for

782 assay with or without radiolabelled ATP. After 1hr, denatured sample was loaded on 10%  
783 SDS-PAGE gel. The gel was further subjected to autoradiography and CBB staining. The  
784 experiment was repeated three times and similar results were obtained.  
785 (D) GC assay: 50µg (in 50 µl) of affinity purified recombinant protein was used for GC assay  
786 with or without GTP. After 1hr, 5 µl of the sample was directly used for cGMP  
787 quantification. Only GTP and GC buffer + GTP were used as controls. Each bar indicate  
788 average and error bar represents SE of three independent experiments. Small letters (a and b)  
789 above the bars indicate significant difference with  $p < 0.05$ .  
790

791 **Figure 6: Kinase activity of OsWAKL21.2 is required for induction of immune**  
792 **responses in rice but not in Arabidopsis.**

793 (A) Quantification of callose deposition after transient overexpression of either wild type  
794 *OsWAKL21.2* (WAK-wt) or kinase deficient mutant of *OsWAKL21.2* (*OsWAKL21.2*-kd or  
795 WAK-kd) in rice leaves. Each bar represents average and error bar represents SE of at least  
796 12 leaves per treatment in an experiment

797 (B) Lesion lengths after 10 days of *Xoo* pin prick inoculation when *OsWAKL21.2* or  
798 *OsWAKL21.2*-kd was transiently overexpressed prior to infection by *Xoo*. Each bar represents  
799 average and error bar represents SE of lesion length in 20-30 leaves in an experiment.

800 (C) Relative expression of key defence related genes after transient overexpression of either  
801 *OsWAKL21.2* or *OsWAKL21.2*-kd in rice leaves. For each gene, transcript level of uninduced  
802 condition (treatment with Agrobacterium carrying WAK-wt or WAK-kd with 0.1% DMSO)  
803 was considered as 1 and was compared to induced condition (treatment with Agrobacterium  
804 carrying WAK-wt or WAK-kd with 20µM estradiol). Each bar represents average fold  
805 change and error bars indicate SE in three independent experiments (n=12 in each  
806 experiment).

807 (D) Quantification of callose deposition in leaves of four different *OsWAKL21.2*-kd  
808 Arabidopsis transgenic lines (lines 1, 4, 11 and 12) treated with either 20µM β-estradiol  
809 (inducer) or 0.1% DMSO (control). Each bar represents average and error bar represents SE  
810 of three leaves in an experiment.

811 (E) Effect of ectopic expression of *OsWAKL21.2*-kd on growth of *Pst* DC3000 after  
812 subsequent infection. Leaves of wild type *OsWAKL21.2* (WAK-wt) and two different  
813 *OsWAKL21.2*-kd Arabidopsis transgenic lines (lines 1 and 11) were infiltrated with either  
814 20µM β-estradiol (inducer) or 0.1% DMSO (control) and were subsequently inoculated with  
815 *Pst* DC3000, 12hr post infiltration. Each bar represents average and error bar represents SE of  
816 five leaves in each sample.

817 (F) Effect of ectopic expression of *OsWAKL21.2*-kd on expression of key defence related  
818 *OsWAKL21.2* responsive genes in transgenic Arabidopsis lines. Expression in 0.1% DMSO  
819 treated leaves was considered as 1 and relative expression in 20µM estradiol treated leaves  
820 was calculated with respect to it. Each bar represents average fold change and error bars  
821 indicate SE in three independent experiments (n=3 in each experiment).

822 In C and F, *OsActin1* and *AtActin2* were used respectively as internal control for qRT-PCR.  
823 The relative fold change was calculated by using  $2^{-\Delta\Delta Ct}$  method. Similar results were obtained  
824 in three different experiments in A, B, D and E. If the significant difference was observed,  
825 asterisk (\*) represents significant difference with  $p < 0.05$  with respect to uninduced condition.

826



827 **Figure 7: GC activity of OsWAKL21.2 is required for induction of immune responses in**  
828 **Arabidopsis but not in rice.**

829 (A) Quantification of callose deposition in leaves of two different Arabidopsis transgenic  
830 lines (lines 3 and 6) expressing GC deficient *OsWAKL21.2* (*OsWAKL21.2-gcd* or WAK-gcd)  
831 that were treated with either 20 $\mu$ M  $\beta$ -estradiol (inducer) or 0.1% DMSO (control). Each bar  
832 represents average and error bar represents SE of three leaves in an experiment.

833 (B) Effect of ectopic expression of *OsWAKL21.2-gcd* on growth of *Pst* DC3000 after  
834 subsequent infection. Leaves of wild type *OsWAKL21.2* (WAK-wt) and two different  
835 *OsWAKL21.2-gcd* Arabidopsis transgenic lines (lines 3 and 6) were infiltrated with either  
836 20 $\mu$ M  $\beta$ -estradiol (inducer) or 0.1% DMSO (control) and were subsequently inoculated with  
837 *Pst* DC3000, 12hr post infiltration. Each bar represents average and error bar represents SE of  
838 five leaves in each sample.

839 (C) Effect of ectopic expression of *OsWAKL21.2-gcd* on expression of key defence related  
840 *OsWAKL21.2* induced genes in transgenic Arabidopsis lines. Expression in 0.1% DMSO  
841 treated leaves was considered as 1 and relative expression in 20 $\mu$ M estradiol treated leaves  
842 was calculated with respect to it. Each bar represents average fold change and error bars  
843 indicate SE in three independent experiments (n=3 in each experiment).

844 (D) Quantification of callose deposition after transient overexpression of either wild type  
845 (WAK-wt) or WAK-gcd in rice leaves. Each bar represents average and error bar represents  
846 SE of at least 12 leaves per treatment in an experiment.

847 (E) Lesion lengths after 10 days of *Xoo* pin prick inoculation when *OsWAKL21.2* or  
848 *OsWAKL21.2-gcd* was transiently overexpressed prior to infection by *Xoo*. Each bar  
849 represents average and error bar represents SE of lesion length in 20-30 leaves in an  
850 experiment.

851 (F) Relative expression of key defence related genes after transient overexpression of either  
852 *OsWAKL21.2* or *OsWAKL21.2-gcd* in rice leaves. For each gene, transcript level of  
853 uninduced condition (treatment with Agrobacterium carrying WAK-wt or WAK-gcd with  
854 0.1% DMSO) was considered as 1 and was compared to induced condition (treatment with  
855 Agrobacterium carrying WAK-wt or WAK-gcd with 20 $\mu$ M estradiol). Each bar represents  
856 average fold change and error bars indicate SE in three independent experiments (n=12 in  
857 each experiment).

858 In C and F, *AtActin2* and *OsActin1* were used respectively as internal control for qRT-PCR.  
859 The relative fold change was calculated by using  $2^{-\Delta\Delta Ct}$  method. Similar results were obtained  
860 in three different experiments in A, B, D and E. If the significant difference was observed,  
861 asterisk (\*) represents significant difference with p<0.05 with respect to uninduced condition.  
862

863 **Figure 8: *OsWAKL21.2* induces expression of JA pathway related genes in rice while it**  
864 **activates SA pathway related genes in Arabidopsis.**

865 (A) Relative expression of ten JA pathway related genes after transient overexpression of  
866 *OsWAKL21.2* in rice leaves. These genes include three ZIM domain-containing proteins  
867 (LOC\_Os03g08310, LOC\_Os03g08330 and LOC\_Os10g25230), two lipoxygenases  
868 (LOC\_Os08g39840 and LOC\_Os08g39850), one allene oxide synthase (AOS,  
869 LOC\_Os03g55800), one basic helix loop helix transcription factor (RERJ1,  
870 LOC\_Os04g23550), one ethylene-responsive transcription factor (ERF, LOC\_Os02g43790),  
871 one chitinase (PR3, LOC\_Os06g51050) and an AP2 domain-containing transcription factor

872 (LOC\_Os08g36920). For each gene, transcript level of uninduced condition (treatment with  
873 Agrobacterium carrying WAK-wt with 0.1% DMSO) was considered as 1 and was compared  
874 to induced condition (treatment with Agrobacterium carrying WAK-wt with 20 $\mu$ M estradiol).  
875 Each bar represents average fold change and error bars indicate SE in three independent  
876 experiments (n=12 in each experiment). *OsActin1* was used as internal control. The relative  
877 fold change was calculated by using  $2^{-\Delta\Delta Ct}$  method. Asterisk (\*) represents significant  
878 difference with p<0.05 with respect to uninduced condition.

879 (B) Effect of ectopic expression of *OsWAKL21.2* on expression of SA pathway related genes  
880 in transgenic Arabidopsis lines. Expression in 0.1% DMSO treated leaves was considered as  
881 1 and relative expression in 20 $\mu$ M estradiol treated leaves was calculated with respect to it.  
882 Each bar represents average fold change and error bars indicate SE in three independent  
883 experiments (n=3 in each experiment). *AtActin2* was used as internal control for qRT-PCR.  
884 The relative fold change was calculated by using  $2^{-\Delta\Delta Ct}$  method. Asterisk (\*) represents  
885 significant difference with p<0.05 with respect to uninduced condition.

886 (C) Quantification of callose deposits in Arabidopsis crossing lines expressing *NahG* and  
887 *OsWAKL21.2* (line 2 and 3) or either one of those (*NahG* only: line 12, WAK-wt only: line  
888 8). Leaves were treated with either 20 $\mu$ M  $\beta$ -estradiol (inducer) or 0.1% DMSO (control).  
889 Each bar represents average and error bar represents SE of three leaves in an experiment.  
890 Asterisk (\*) represents significant difference with p<0.05 with respect to uninduced  
891 condition.

892 (D) Modal depicting mechanistic role of *OsWAKL21.2* in induction of immune responses in  
893 rice and Arabidopsis. *OsWAKL21.2* likely perceive cell wall damage caused after LipA  
894 treatment in rice. Upon overexpression in rice, *OsWAKL21.2* induces rice immune responses  
895 via its kinase activity. Upon ectopic expression in Arabidopsis transgenic lines,  
896 *OsWAKL21.2* induce Arabidopsis immune responses by its GC activity.

897

898

## 899 **References:**

900

901

902 ALBERSHEIM, P. & ANDERSON-PROUTY, A. J. 1975. Carbohydrates, proteins, cell  
903 surfaces, and the biochemistry of pathogenesis. *Annual Review of Plant Physiology*,  
904 26, 31-52.

905 APARNA, G., CHATTERJEE, A., JHA, G., SONTI, R. V. & SANKARANARAYANAN,  
906 R. 2007. Crystallization and preliminary crystallographic studies of LipA, a secretory  
907 lipase/esterase from *Xanthomonas oryzae* pv. *oryzae*. *Acta Crystallogr Sect F Struct*  
908 *Biol Cryst Commun*, 63, 708-10.

909 APARNA, G., CHATTERJEE, A., SONTI, R. V. & SANKARANARAYANAN, R. 2009. A  
910 cell wall-degrading esterase of *Xanthomonas oryzae* requires a unique substrate  
911 recognition module for pathogenesis on rice. *Plant Cell*, 21, 1860-73.

912 ARVIDSSON, S., KWASNIEWSKI, M., RIAÑO-PACHÓN, D. M. & MUELLER-  
913 ROEBER, B. 2008. QuantPrime – a flexible tool for reliable high-throughput primer  
914 design for quantitative PCR. *BMC Bioinformatics*, 9, 465.

- 915 BAI, W., CHERN, M., RUAN, D., CANLAS, P. E., SZE-TO, W. H. & RONALD, P. C.  
916 2011. Enhanced disease resistance and hypersensitivity to BTH by introduction of an  
917 NH1/OsNPR1 paralog. *Plant Biotechnology Journal*, 9, 205-215.
- 918 BRUTUS, A., SICILIA, F., MACONE, A., CERVONE, F. & LORENZO, G. 2010. A  
919 domain swap approach reveals a role of the plant wall-associated kinase 1 (WAK1) as  
920 a receptor of oligogalacturonides. *Proc Natl Acad Sci U S A*, 107.
- 921 CHEN, X., ZUO, S., SCHWESSINGER, B., CHERN, M., CANLAS, P. E., RUAN, D.,  
922 ZHOU, X., WANG, J., DAUDI, A., PETZOLD, C. J., HEAZLEWOOD, J. L. &  
923 RONALD, P. C. 2014. An XA21-associated kinase (OsSERK2) regulates immunity  
924 mediated by the XA21 and XA3 immune receptors. *Mol Plant*, 7, 874-92.
- 925 CHEN, Z., CHEN, T., SATHE, A., HE, Y., ZHANG, X.-B. & WU, J.-L. 2018. Identification  
926 of a Novel Semi-Dominant Spotted-Leaf Mutant with Enhanced Resistance to  
927 *Xanthomonas oryzae* pv. *oryzae* in Rice. *International journal of molecular sciences*,  
928 19, 3766.
- 929 CLAVERIE, J., BALACEY, S., LEMAÎTRE-GUILLIER, C., BRULÉ, D., CHILTZ, A.,  
930 GRANET, L., NOIROT, E., DAIRE, X., DARBLADE, B., HÉLOIR, M.-C. &  
931 POINSSOT, B. 2018. The Cell Wall-Derived Xyloglucan Is a New DAMP Triggering  
932 Plant Immunity in *Vitis vinifera* and *Arabidopsis thaliana*. *Frontiers in Plant Science*,  
933 9, 1725.
- 934 CLOUGH, S. J. & BENT, A. F. 1998. Floral dip: a simplified method for *Agrobacterium*-  
935 mediated transformation of *Arabidopsis thaliana*. *Plant J*, 16, 735-43.
- 936 COUTO, D., STRANSFELD, L., ARRUBARRENA, A., ZIPFEL, C. & LOZANO-  
937 DURÁN, R. 2015. Broad application of a simple and affordable protocol for isolating  
938 plant RNA. *BMC Research Notes*, 8, 154.
- 939 CURTIS, M. D. & GROSSNIKLAUS, U. 2003. A Gateway Cloning Vector Set for High-  
940 Throughput Functional Analysis of Genes in *Planta*. *Plant Physiology*, 133, 462-469.
- 941 DE AZEVEDO SOUZA, C., LI, S., LIN, A. Z., BOUTROT, F., GROSSMANN, G.,  
942 ZIPFEL, C. & SOMERVILLE, S. 2017. Cellulose-derived oligomers act as damage-  
943 associated molecular patterns and trigger defense-like responses. *Plant Physiology*.
- 944 DELANEY, T. P., UKNES, S., VERNOOIJ, B., FRIEDRICH, L., WEYMANN, K.,  
945 NEGROTTO, D., GAFFNEY, T., GUT-RELLA, M., KESSMANN, H., WARD, E. &  
946 RYALS, J. 1994. A central role of salicylic Acid in plant disease resistance. *Science*,  
947 266, 1247-50.
- 948 DELTEIL, A., GOBBATO, E., CAYROL, B., ESTEVAN, J., MICHEL-ROMITI, C.,  
949 DIEVART, A., KROJ, T. & MOREL, J.-B. 2016. Several wall-associated kinases  
950 participate positively and negatively in basal defense against rice blast fungus. *BMC*  
951 *Plant Biology*, 16, 17.
- 952 DONG, X., HONG, Z., CHATTERJEE, J., KIM, S. & VERMA, D. P. S. 2008. Expression of  
953 callose synthase genes and its connection with Npr1 signaling pathway during  
954 pathogen infection. *Planta*, 229, 87-98.
- 955 DUBOVSKAYA, L. V., BAKAKINA, Y. S., KOLESNEVA, E. V., SODEL, D. L.,  
956 MCAINSH, M. R., HETHERINGTON, A. M. & VOLOTOVSKI, I. D. 2011. cGMP-  
957 dependent ABA-induced stomatal closure in the ABA-insensitive *Arabidopsis* mutant  
958 *abi1-1*. *New Phytol*, 191, 57-69.
- 959 GALLETTI, R., DENOUX, C., GAMBETTA, S., DEWDNEY, J., AUSUBEL, F. M., DE  
960 LORENZO, G. & FERRARI, S. 2008. The AtrbohD-Mediated Oxidative Burst  
961 Elicited by Oligogalacturonides in *Arabidopsis* Is Dispensable for the Activation of  
962 Defense Responses Effective against *Botrytis cinerea*. *Plant Physiology*,  
963 148, 1695-1706.

- 964 GEHRING, C. & TUREK, I. S. 2017. Cyclic nucleotide monophosphates and their cyclases  
965 in plant signaling. *Frontiers in plant science*, 8, 1704.
- 966 GUST, A. A., PRUITT, R. & NÜRNBERGER, T. 2017. Sensing Danger: Key to Activating  
967 Plant Immunity. *Trends in plant science*, 22, 779-791.
- 968 HARKENRIDER, M., SHARMA, R., DE VLEESSCHAUWER, D., TSAO, L., ZHANG, X.,  
969 CHERN, M., CANLAS, P., ZUO, S. & RONALD, P. C. 2016. Overexpression of  
970 Rice Wall-Associated Kinase 25 (OsWAK25) Alters Resistance to Bacterial and  
971 Fungal Pathogens. *PLoS ONE*, 11, e0147310.
- 972 HE, Z. H., CHEESEMAN, I., HE, D. & KOHORN, B. D. 1999. A cluster of five cell wall-  
973 associated receptor kinase genes, Wak1-5, are expressed in specific organs of  
974 Arabidopsis. *Plant Mol Biol*, 39, 1189-96.
- 975 HE, Z. H., HE, D. & KOHORN, B. D. 1998. Requirement for the induced expression of a  
976 cell wall associated receptor kinase for survival during the pathogen response. *Plant J*,  
977 14, 55-63.
- 978 HÉMATY, K., CHERK, C. & SOMERVILLE, S. 2009. Host-pathogen warfare at the plant  
979 cell wall. *Current Opinion in Plant Biology*, 12, 406-413.
- 980 HU, K., CAO, J., ZHANG, J., XIA, F., KE, Y., ZHANG, H., XIE, W., LIU, H., CUI, Y.,  
981 CAO, Y., SUN, X., XIAO, J., LI, X., ZHANG, Q. & WANG, S. 2017. Improvement  
982 of multiple agronomic traits by a disease resistance gene via cell wall reinforcement.  
983 3, 17009.
- 984 HURNI, S., SCHEUERMANN, D., KRATTINGER, S. G., KESSEL, B., WICKER, T.,  
985 HERREN, G., FITZE, M. N., BREEN, J., PRESTERL, T. & OUZUNOVA, M. 2015.  
986 The maize disease resistance gene Htn1 against northern corn leaf blight encodes a  
987 wall-associated receptor-like kinase. *Proceedings of the National Academy of  
988 Sciences*, 112, 8780-8785.
- 989 IGARASHI, D., TSUDA, K. & KATAGIRI, F. 2012. The peptide growth factor,  
990 phytosulfokine, attenuates pattern-triggered immunity. *Plant J*, 71, 194-204.
- 991 JACOBS, A. K., LIPKA, V., BURTON, R. A., PANSTRUGA, R., STRIZHOV, N.,  
992 SCHULZE-LEFERT, P. & FINCHER, G. B. 2003. An Arabidopsis Callose Synthase,  
993 GSL5, Is Required for Wound and Papillary Callose Formation. *Plant Cell*, 15, 2503-  
994 13.
- 995 JANDA, M. & RUELLAND, E. 2015. Magical mystery tour: salicylic acid signalling.  
996 *Environmental and Experimental Botany*, 114, 117-128.
- 997 JHA, G., PATEL, H. K., DASGUPTA, M., PALAPARTHI, R. & SONTI, R. V. 2010.  
998 Transcriptional Profiling of Rice Leaves Undergoing a Hypersensitive Response Like  
999 Reaction Induced by *Xanthomonas oryzae* pv. *oryzae* Cellulase. *Rice*, 3, 1-21.
- 1000 JHA, G., RAJESHWARI, R. & SONTI, R. V. 2007. Functional interplay between two  
1001 *Xanthomonas oryzae* pv. *oryzae* secretion systems in modulating virulence on rice.  
1002 *Molecular Plant-Microbe Interactions*, 20, 31-40.
- 1003 KANT, R. & DASGUPTA, I. 2017. Phenotyping of VIGS-mediated gene silencing in rice  
1004 using a vector derived from a DNA virus. *Plant cell reports*, 36, 1159-1170.
- 1005 KARIMI, M., INZE, D. & DEPICKER, A. 2002. GATEWAY vectors for Agrobacterium-  
1006 mediated plant transformation. *Trends Plant Sci*, 7, 193-5.
- 1007 KOHORN, B. D. 2015. Cell wall-associated kinases and pectin perception. *Journal of  
1008 experimental botany*, 67, 489-494.
- 1009 KOHORN, B. D., JOHANSEN, S., SHISHIDO, A., TODOROVA, T., MARTINEZ, R.,  
1010 DEFEO, E. & OBREGON, P. 2009. Pectin activation of MAP kinase and gene  
1011 expression is WAK2 dependent. *Plant J*, 60, 974-82.
- 1012 KOHORN, B. D., KOBAYASHI, M., JOHANSEN, S., FRIEDMAN, H. P., FISCHER, A. &  
1013 BYERS, N. 2006. Wall-associated kinase 1 (WAK1) is crosslinked in

- 1014 endomembranes, and transport to the cell surface requires correct cell-wall synthesis.  
1015 *Journal of cell science*, 119, 2282-2290.
- 1016 KWEZI, L., RUZVIDZO, O., WHEELER, J. I., GOVENDER, K., IACUONE, S.,  
1017 THOMPSON, P. E., GEHRING, C. & IRVING, H. R. 2011. The phytosulfokine  
1018 (PSK) receptor is capable of guanylate cyclase activity and enabling cyclic GMP-  
1019 dependent signaling in plants. *J Biol Chem*, 286, 22580-8.
- 1020 LI, H., ZHOU, S. Y., ZHAO, W. S., SU, S. C. & PENG, Y. L. 2009. A novel wall-associated  
1021 receptor-like protein kinase gene, OsWAK1, plays important roles in rice blast  
1022 disease resistance. *Plant Mol Biol*, 69.
- 1023 LIVAK, K. J. & SCHMITTGEN, T. D. 2001. Analysis of relative gene expression data using  
1024 real-time quantitative PCR and the 2(-Delta Delta C(T)) Method. *Methods*, 25, 402-8.
- 1025 LOZANO-DURÁN, R. & ZIPFEL, C. 2015. Trade-off between growth and immunity: role  
1026 of brassinosteroids. *Trends in plant science*, 20, 12-19.
- 1027 MA, Y., WALKER, R. K., ZHAO, Y. & BERKOWITZ, G. A. 2012. Linking ligand  
1028 perception by PEPR pattern recognition receptors to cytosolic Ca<sup>2+</sup> elevation and  
1029 downstream immune signaling in plants. *Proc Natl Acad Sci U S A*, 109, 19852-7.
- 1030 MACHO, A. P. & ZIPFEL, C. 2014. Plant PRRs and the activation of innate immune  
1031 signaling. *Mol Cell*, 54, 263-72.
- 1032 MEIER, S., RUZVIDZO, O., MORSE, M., DONALDSON, L., KWEZI, L. & GEHRING, C.  
1033 2010. The Arabidopsis Wall Associated Kinase-Like 10 Gene Encodes a Functional  
1034 Guanylyl Cyclase and Is Co-Expressed with Pathogen Defense Related Genes. *PLoS*  
1035 *ONE*, 5, e8904.
- 1036 MENG, X. & ZHANG, S. 2013. MAPK cascades in plant disease resistance signaling. *Annu*  
1037 *Rev Phytopathol*, 51, 245-66.
- 1038 MILLET, Y. A., DANNA, C. H., CLAY, N. K., SONGNUAN, W., SIMON, M. D.,  
1039 WERCK-REICHHART, D. & AUSUBEL, F. M. 2010. Innate immune responses  
1040 activated in Arabidopsis roots by microbe-associated molecular patterns. *Plant Cell*,  
1041 22, 973-90.
- 1042 NAN, W., WANG, X., YANG, L., HU, Y., WEI, Y., LIANG, X., MAO, L. & BI, Y. 2014.  
1043 Cyclic GMP is involved in auxin signalling during Arabidopsis root growth and  
1044 development. *J Exp Bot*, 65, 1571-83.
- 1045 OÑATE-SÁNCHEZ, L. & VICENTE-CARBAJOSA, J. 2008. DNA-free RNA isolation  
1046 protocols for Arabidopsis thaliana, including seeds and siliques. *BMC Research*  
1047 *Notes*, 1, 93.
- 1048 PARK, C. J., PENG, Y., CHEN, X., DARDICK, C., RUAN, D., BART, R., CANLAS, P. E.  
1049 & RONALD, P. C. 2008. Rice XB15, a protein phosphatase 2C, negatively regulates  
1050 cell death and XA21-mediated innate immunity. *PLoS Biol*, 6, e231.
- 1051 PILLAI, S. E., KUMAR, C., PATEL, H. K. & SONTI, R. V. 2018. Overexpression of a cell  
1052 wall damage induced transcription factor, OsWRKY42, leads to enhanced callose  
1053 deposition and tolerance to salt stress but does not enhance tolerance to bacterial  
1054 infection. *BMC Plant Biology*, 18, 177.
- 1055 PURKAYASTHA, A., MATHUR, S., VERMA, V., SHARMA, S. & DASGUPTA, I. 2010.  
1056 Virus-induced gene silencing in rice using a vector derived from a DNA virus. *Planta*,  
1057 232, 1531-1540.
- 1058 QI, Z., VERMA, R., GEHRING, C., YAMAGUCHI, Y., ZHAO, Y., RYAN, C. A. &  
1059 BERKOWITZ, G. A. 2010. Ca<sup>2+</sup> signaling by plant Arabidopsis thaliana Pep  
1060 peptides depends on AtPepR1, a receptor with guanylyl cyclase activity, and cGMP-  
1061 activated Ca<sup>2+</sup> channels. *Proc Natl Acad Sci U S A*, 107, 21193-8.

- 1062 RAJESHWARI, R., JHA, G. & SONTI, R. V. 2005. Role of an In Planta-Expressed Xylanase  
1063 of *Xanthomonas oryzae* pv. *oryzae* in Promoting Virulence on Rice. *Molecular Plant-*  
1064 *Microbe Interactions*, 18, 830-837.
- 1065 RANJAN, A., VADASSERY, J., PATEL, H. K., PANDEY, A., PALAPARTHI, R.,  
1066 MITHOFER, A. & SONTI, R. V. 2015. Upregulation of jasmonate biosynthesis and  
1067 jasmonate-responsive genes in rice leaves in response to a bacterial pathogen mimic.  
1068 *Funct Integr Genomics*, 15, 363-73.
- 1069 ROHILA, J. S., CHEN, M., CHEN, S., CHEN, J., CERNY, R., DARDICK, C., CANLAS, P.,  
1070 XU, X., GRIBSKOV, M., KANRAR, S., ZHU, J. K., RONALD, P. & FROMM, M.  
1071 E. 2006. Protein-protein interactions of tandem affinity purification-tagged protein  
1072 kinases in rice. *Plant J*, 46, 1-13.
- 1073 SAINTENAC, C., LEE, W.-S., CAMBON, F., RUDD, J. J., KING, R. C., MARANDE, W.,  
1074 POWERS, S. J., BERGES, H., PHILLIPS, A. L. & UAUY, C. 2018. Wheat receptor-  
1075 kinase-like protein Stb6 controls gene-for-gene resistance to fungal pathogen  
1076 *Zymoseptoria tritici*. *Nature genetics*, 50, 368.
- 1077 SUN, W., CAO, Z., LI, Y., ZHAO, Y. & ZHANG, H. 2007. A simple and effective method  
1078 for protein subcellular localization using *Agrobacterium*-mediated transformation of  
1079 onion epidermal cells. *Biologia*, 62, 529-532.
- 1080 SWIEZAWSKA, B., JAWORSKI, K., DUSZYN, M., PAWELEK, A. & SZMIDT-  
1081 JAWORSKA, A. 2017. The *Hippeastrum hybridum* PepR1 gene (HpPepR1) encodes  
1082 a functional guanylyl cyclase and is involved in early response to fungal infection. *J*  
1083 *Plant Physiol*, 216, 100-107.
- 1084 SWIEZAWSKA, B., JAWORSKI, K., SZEWCZUK, P., PAWELEK, A. & SZMIDT-  
1085 JAWORSKA, A. 2015. Identification of a *Hippeastrum hybridum* guanylyl cyclase  
1086 responsive to wounding and pathogen infection. *J Plant Physiol*, 189, 77-86.
- 1087 VERICA, J. A. & HE, Z. 2002. The Cell Wall-Associated Kinase (WAK) and WAK-Like  
1088 Kinase Gene Family. *Plant Physiology*, 129, 455-459.
- 1089 WANG, L., EINIG, E., ALMEIDA-TRAPP, M., ALBERT, M., FLIEGMANN, J.,  
1090 MITHÖFER, A., KALBACHER, H. & FELIX, G. 2018. The systemin receptor SYR1  
1091 enhances resistance of tomato against herbivorous insects. *Nature Plants*, 4, 152-156.
- 1092 WONG, A., GEHRING, C. & IRVING, H. R. 2015. Conserved Functional Motifs and  
1093 Homology Modeling to Predict Hidden Moonlighting Functional Sites. *Frontiers in*  
1094 *Bioengineering and Biotechnology*, 3, 82.
- 1095 XIN, X. F. & HE, S. Y. 2013. *Pseudomonas syringae* pv. *tomato* DC3000: a model pathogen  
1096 for probing disease susceptibility and hormone signaling in plants. *Annu Rev*  
1097 *Phytopathol*, 51, 473-98.
- 1098 XU, N., FU, D., LI, S., WANG, Y. & WONG, A. 2018. GCPred: a web tool for guanylyl  
1099 cyclase functional centre prediction from amino acid sequence. *Bioinformatics*, 34,  
1100 2134-2135.
- 1101 ZHANG, N., ZHANG, B., ZUO, W., XING, Y., KONLASUK, S., TAN, G., ZHANG, Q.,  
1102 YE, J. & XU, M. 2017. Cytological and Molecular Characterization of ZmWAK-  
1103 Mediated Head-Smut Resistance in Maize. *Mol Plant Microbe Interact*, 30, 455-465.
- 1104 ZHENG, L., BAUMANN, U. & REYMOND, J.-L. 2004. An efficient one-step site-directed  
1105 and site-saturation mutagenesis protocol. *Nucleic Acids Research*, 32, e115-e115.
- 1106 ZUO, W., CHAO, Q., ZHANG, N., YE, J., TAN, G., LI, B., XING, Y., ZHANG, B., LIU,  
1107 H., FENGLER, K. A., ZHAO, J., ZHAO, X., CHEN, Y., LAI, J., YAN, J. & XU, M.  
1108 2015. A maize wall-associated kinase confers quantitative resistance to head smut.  
1109 *Nat Genet*, 47, 151-7.

1110

A

bioRxiv preprint doi: <https://doi.org/10.1101/754234>; this version posted September 26, 2019. The copyright holder for this preprint (which was not certified by peer review) is the author/funder. All rights reserved. No reuse allowed without permission.

LipA 12hr Up      LipA 2hr Up

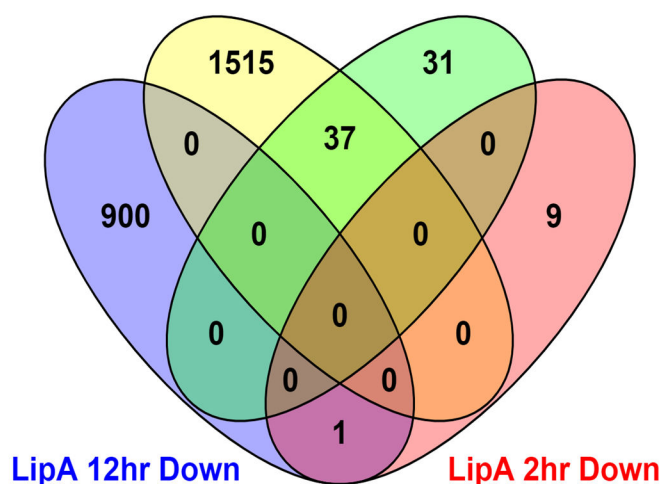

B

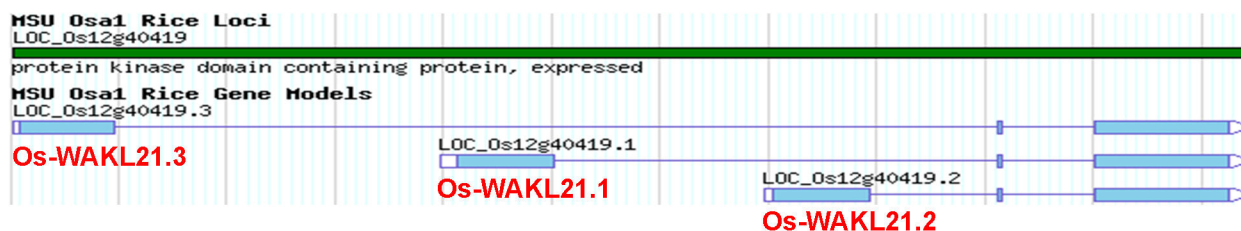

C

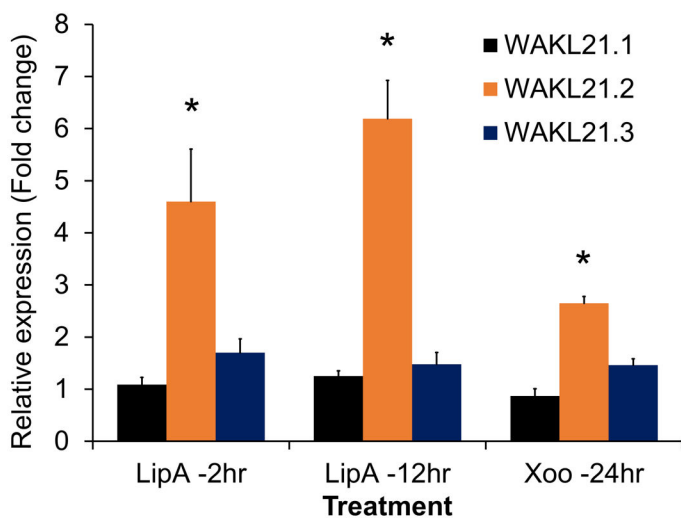

D

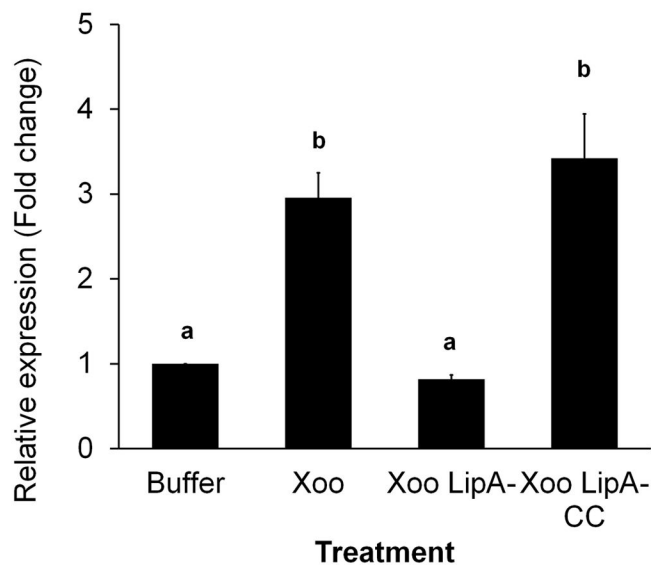

# Figure 2

**A**

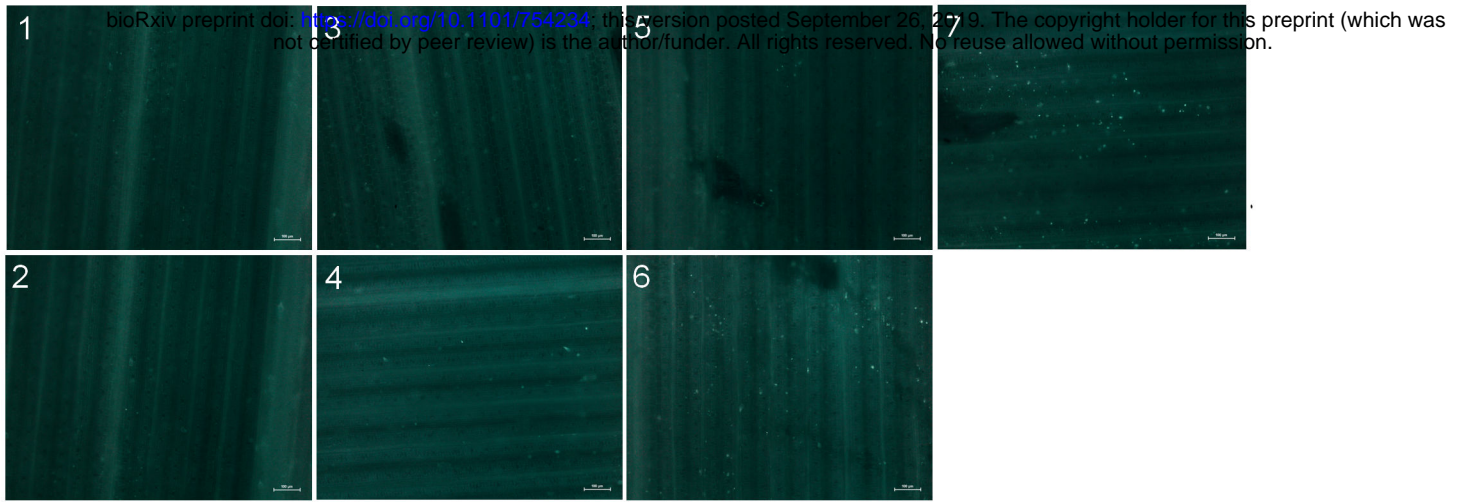

**B**

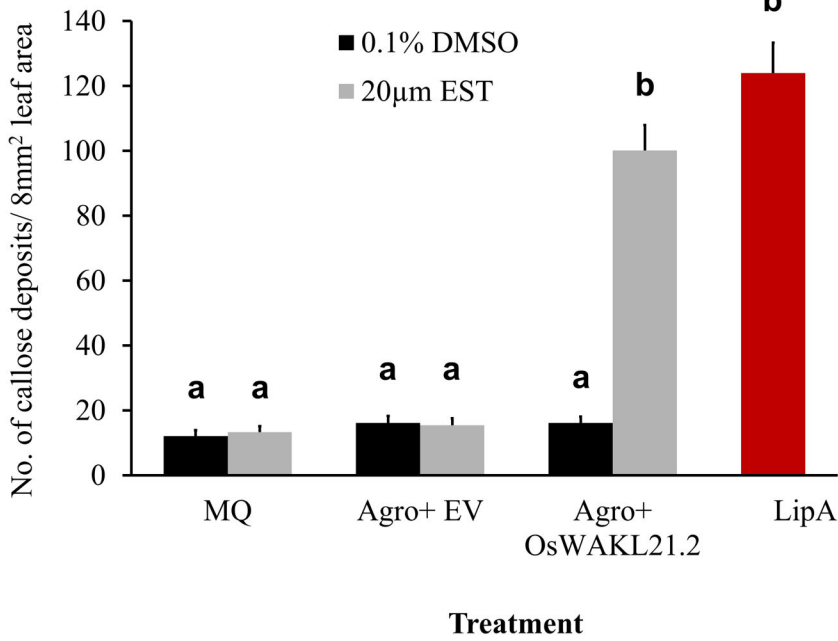

**C**

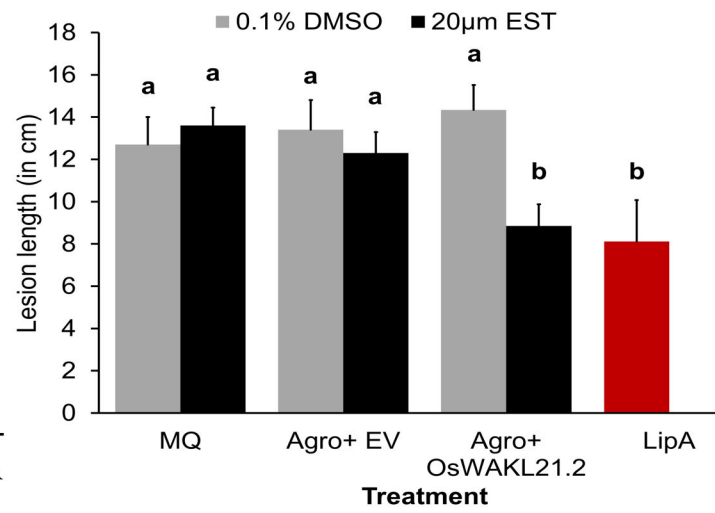

**D**

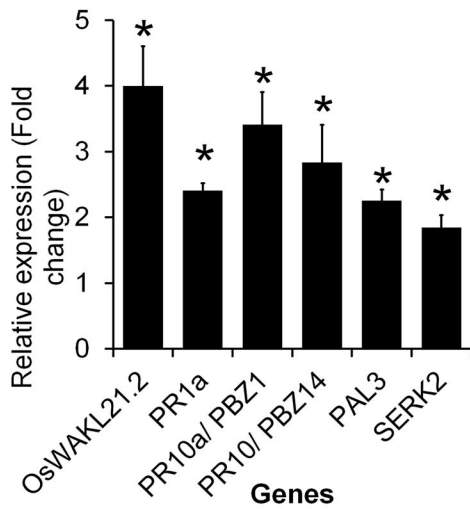



# Figure 3

**A** bioRxiv preprint doi: <https://doi.org/10.1101/754234>; this version posted September 26, 2019. The copyright holder for this preprint (which was not certified by peer review) is the author/funder. All rights reserved. No reuse allowed without permission.

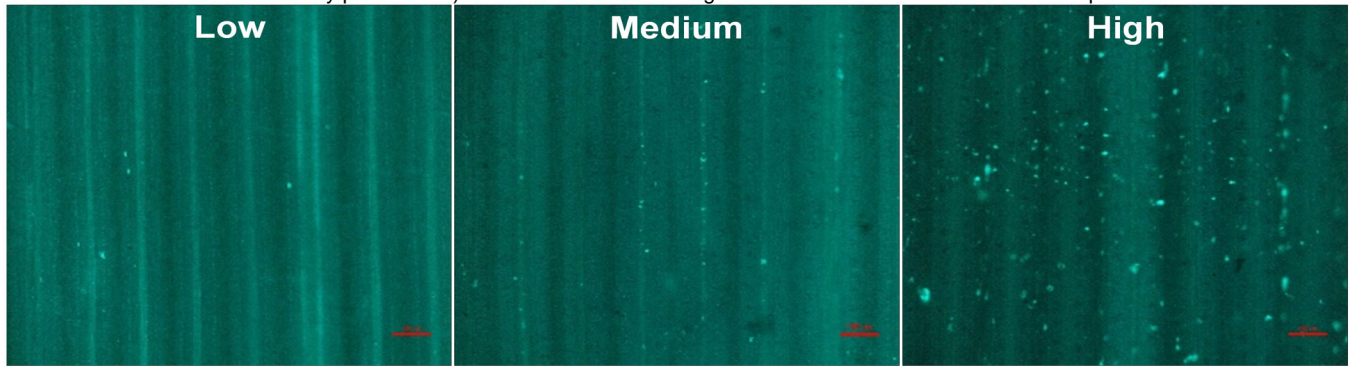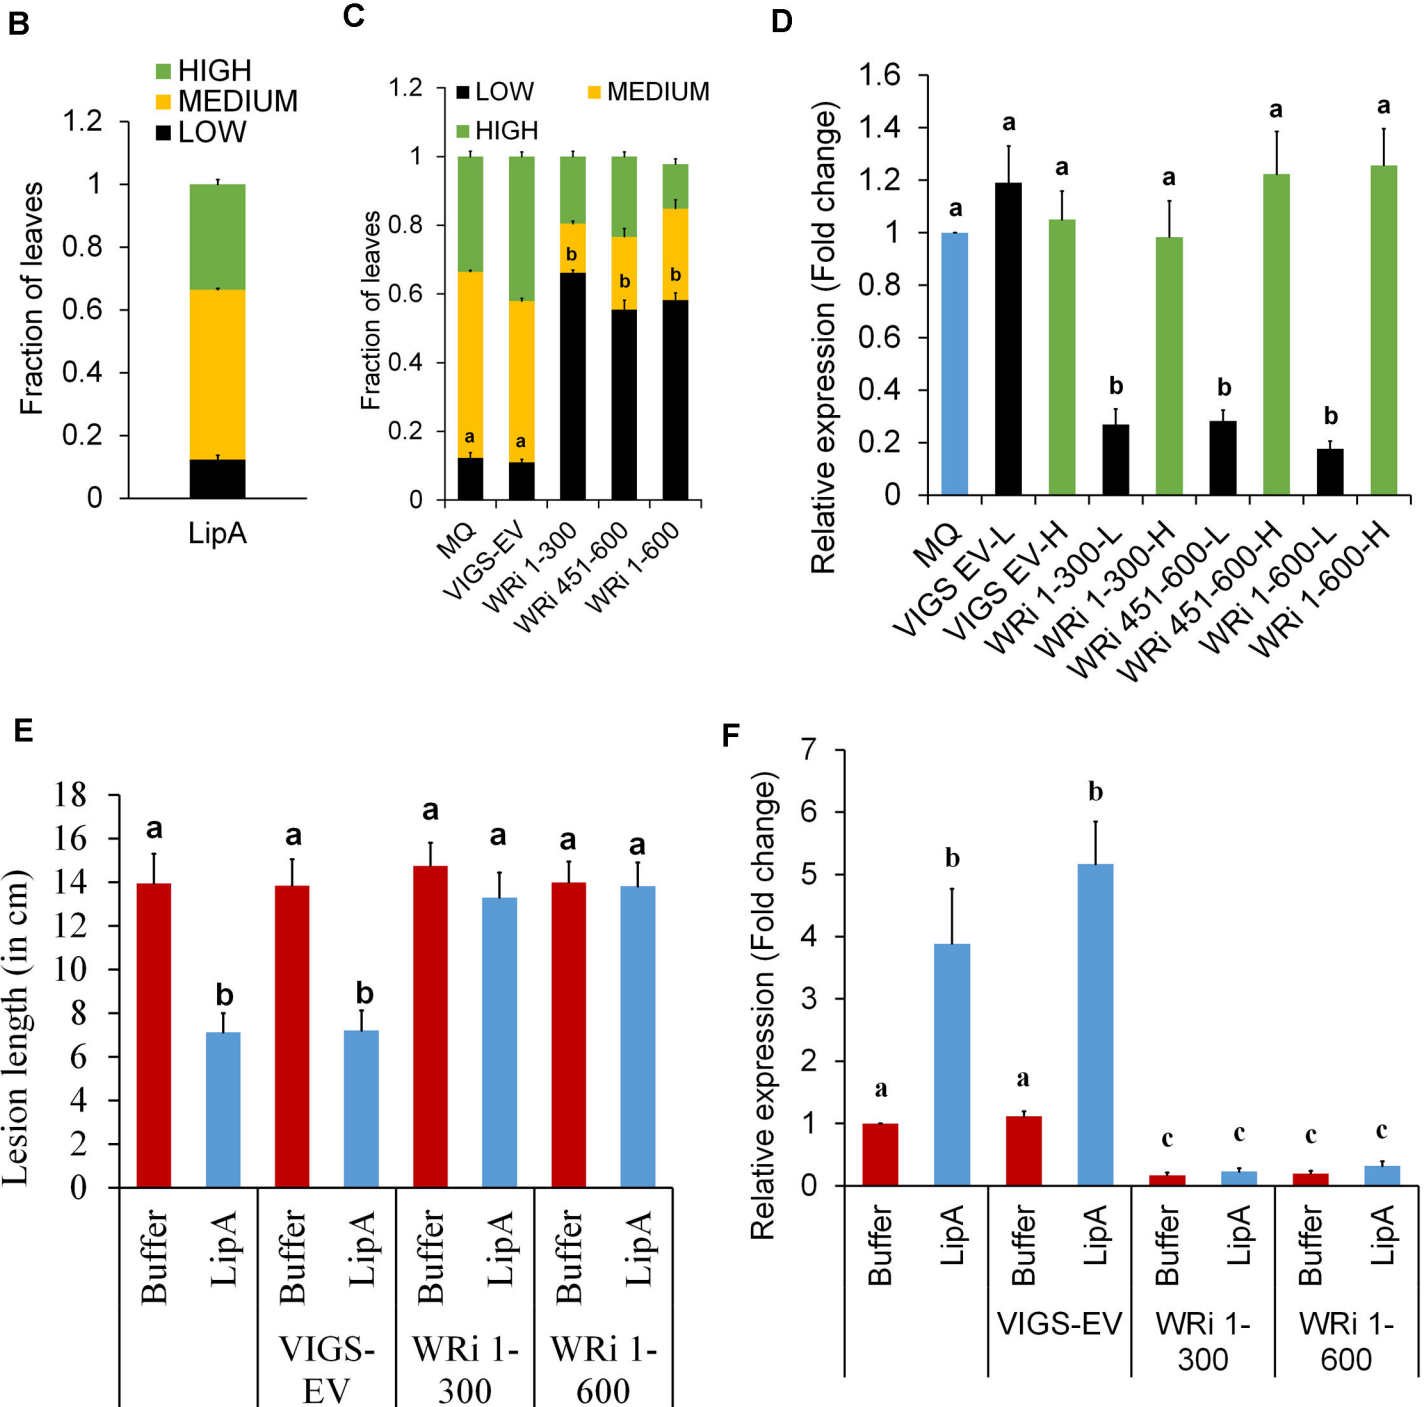

# Figure 4

bioRxiv preprint doi: <https://doi.org/10.1101/754234>; this version posted September 26, 2019. The copyright holder for this preprint (which was not certified by peer review) is the author/funder. All rights reserved. No reuse allowed without permission.

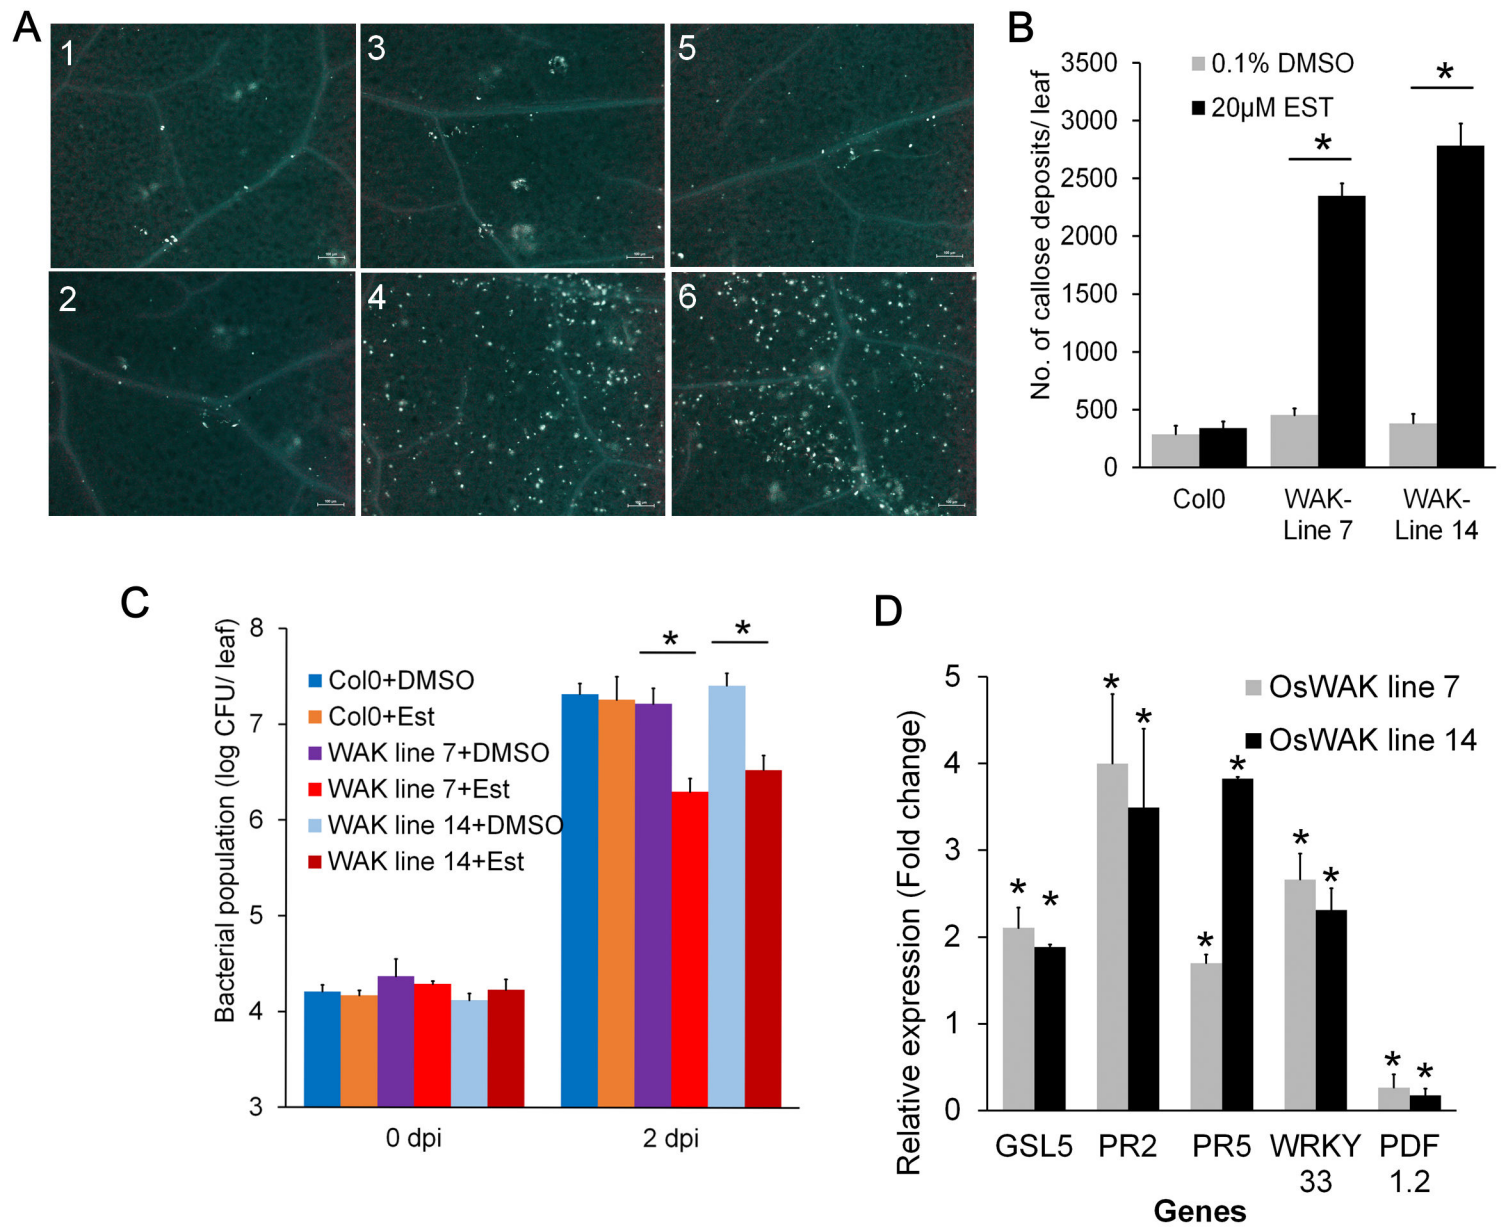

# Figure 5

A bioRxiv preprint doi: <https://doi.org/10.1101/754234>; this version posted September 26, 2019. The copyright holder for this preprint (which was not certified by peer review) is the author/funder. All rights reserved. No reuse allowed without permission.

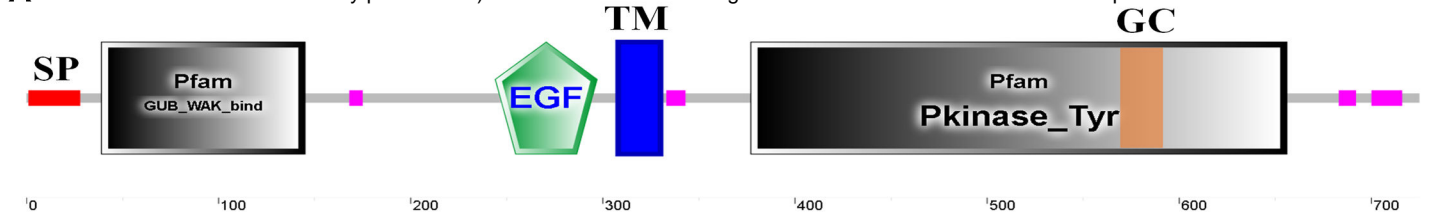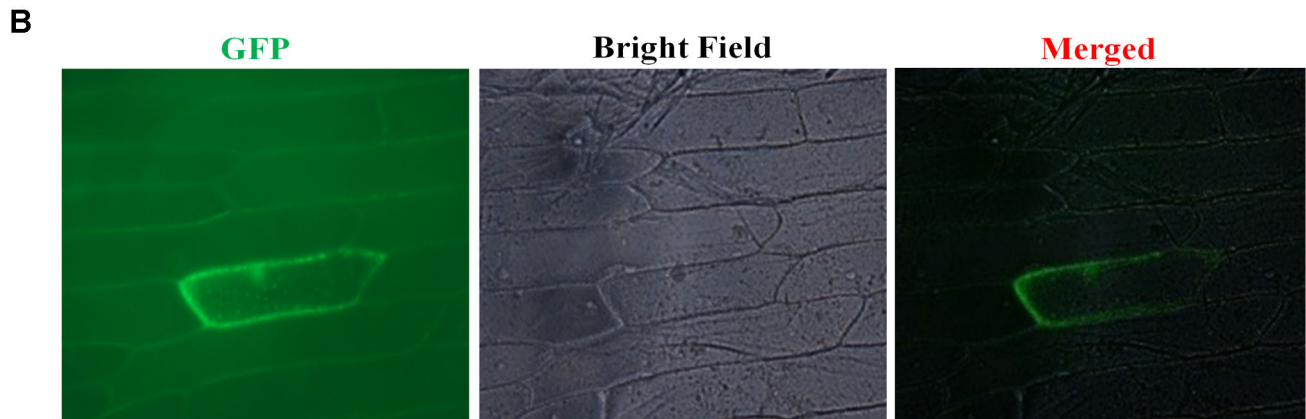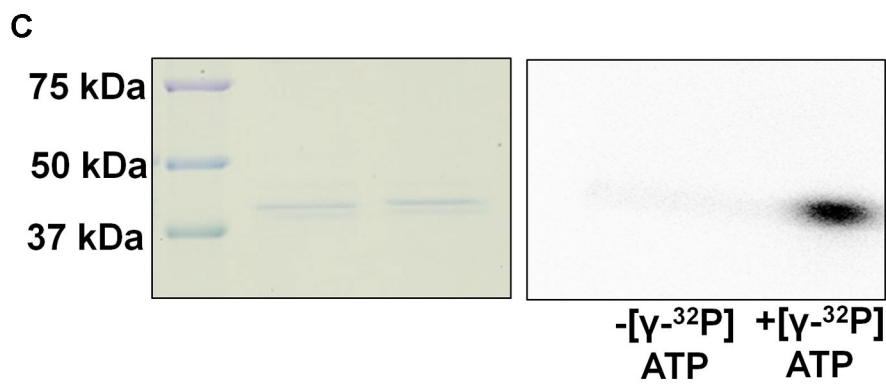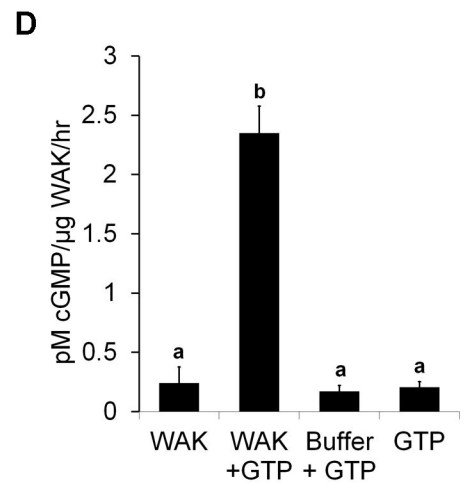

**Figure 6**

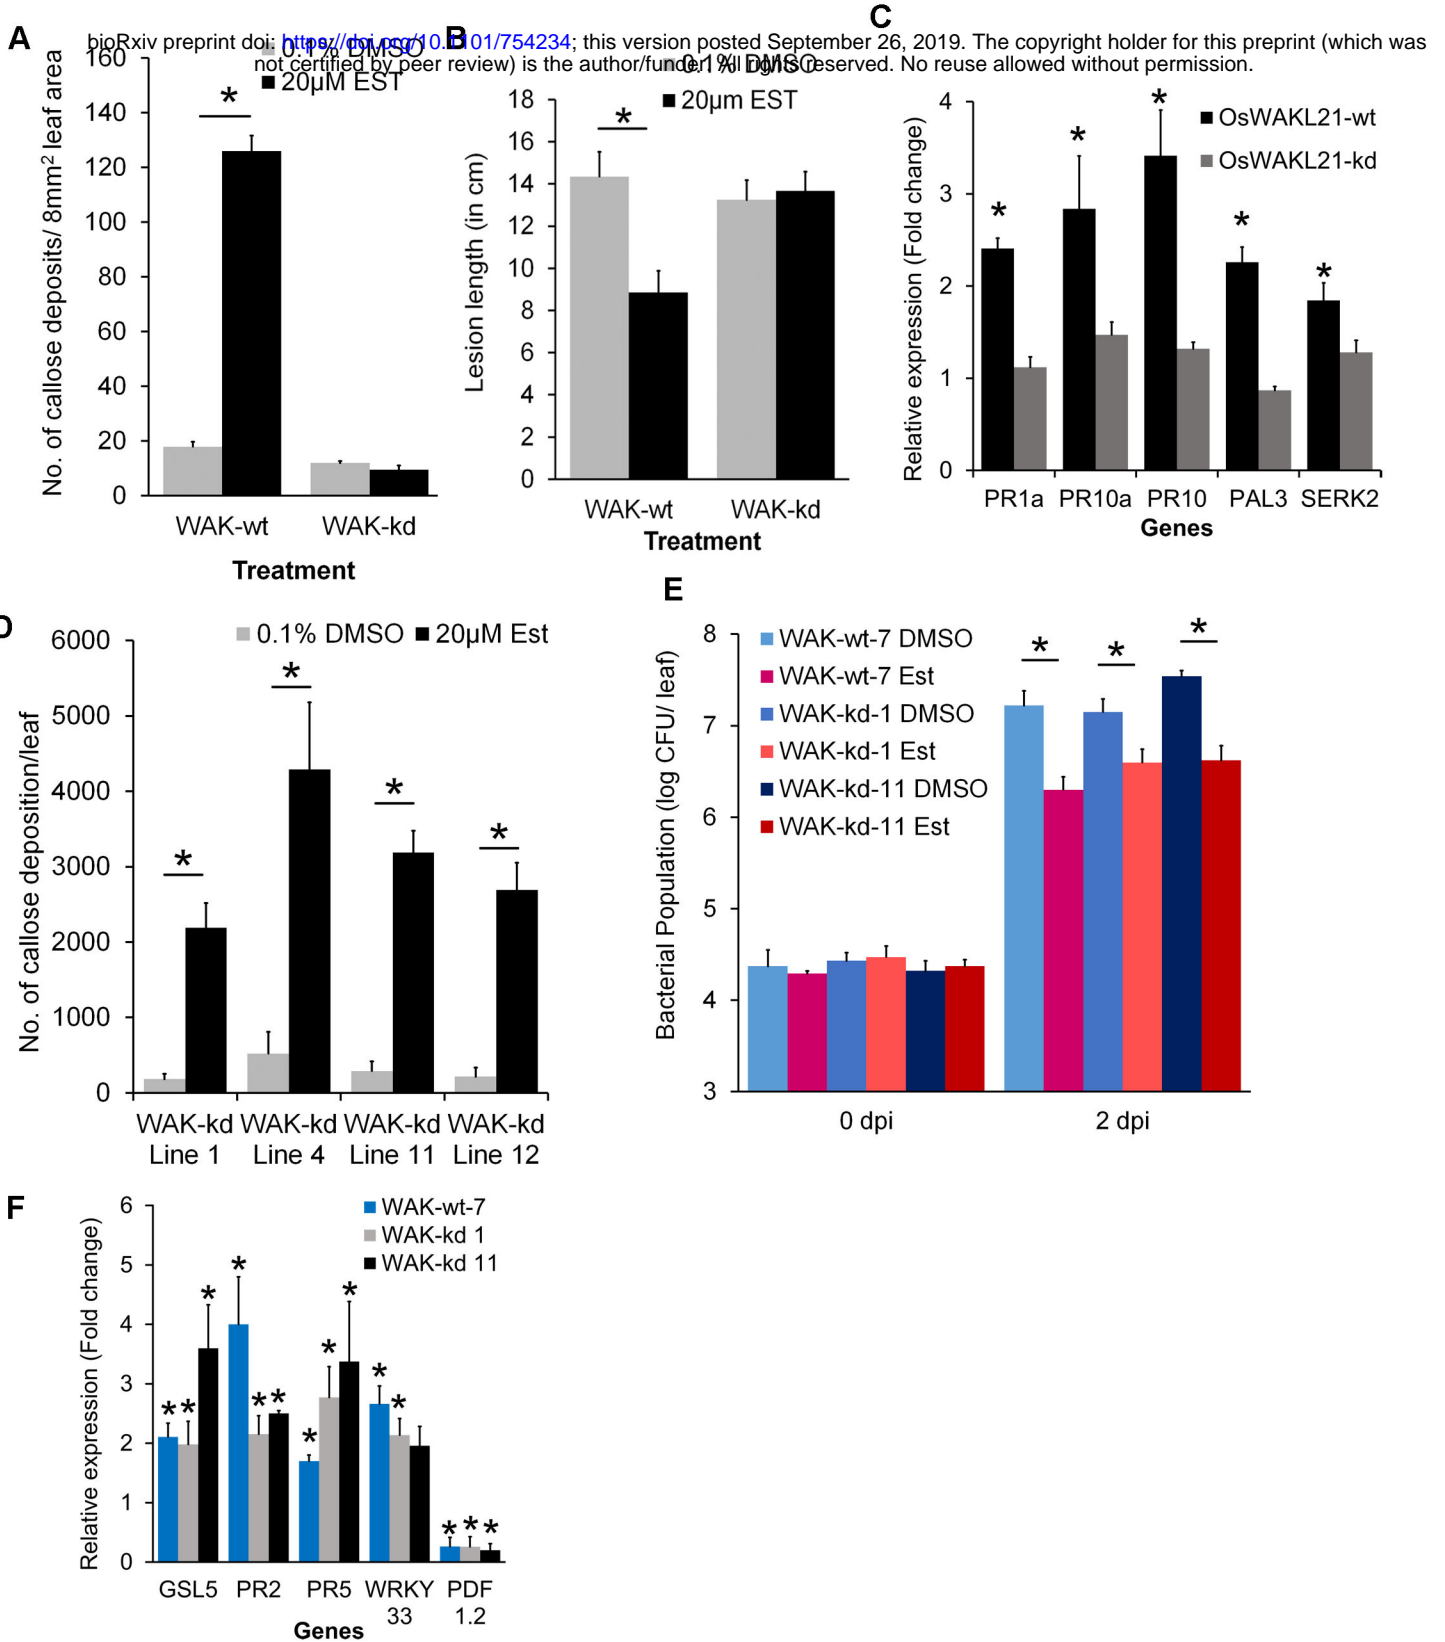

# Figure 7

**A** bioRxiv preprint doi: <https://doi.org/10.1101/754234>; this version posted September 26, 2019. The copyright holder for this preprint (which was not certified by peer review) is the author/funder. All rights reserved. No reuse allowed without permission.

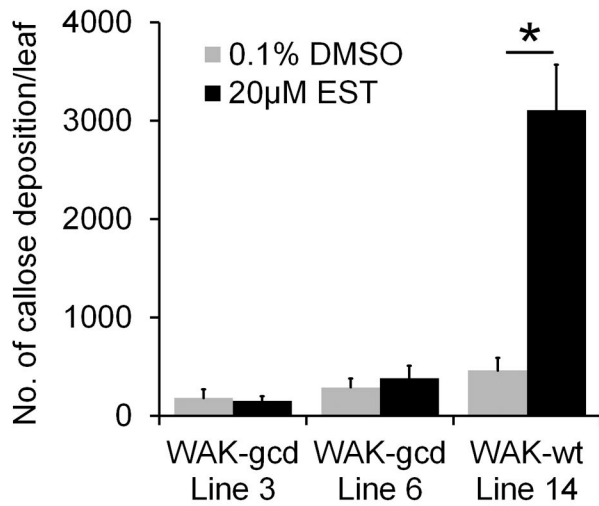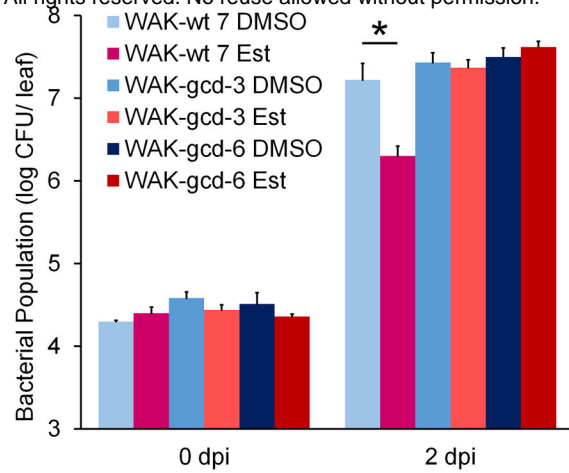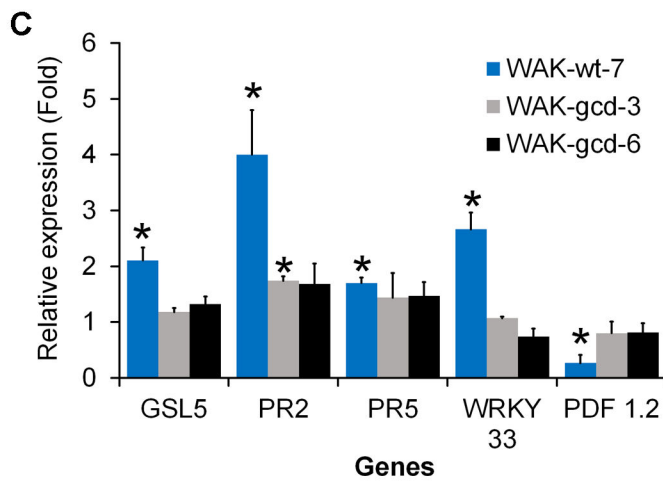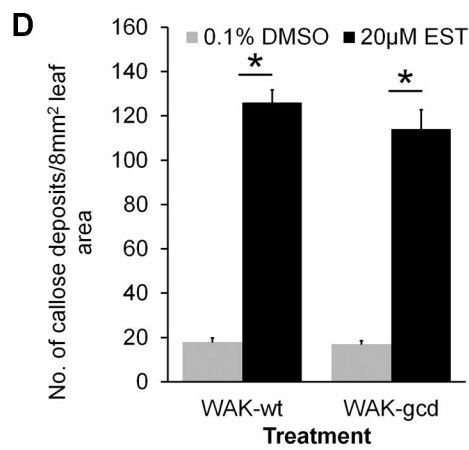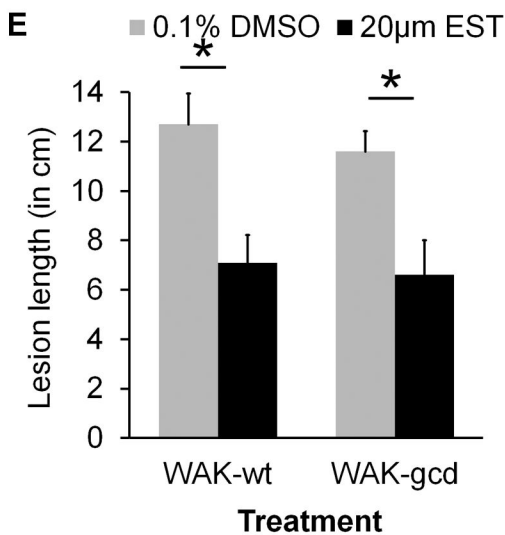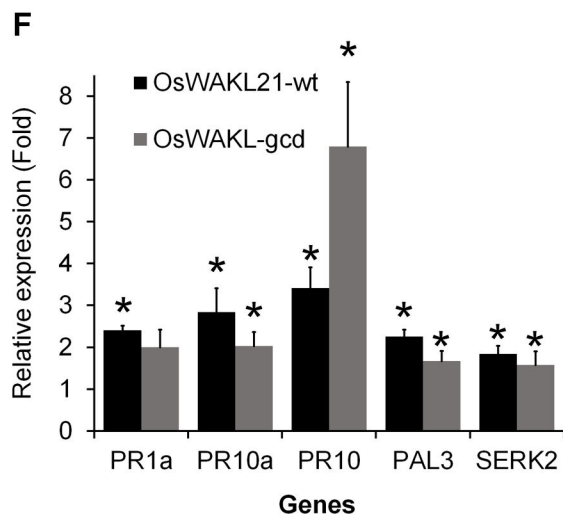

# Figure 8

bioRxiv preprint doi: <https://doi.org/10.1101/754234>; this version posted September 26, 2019. The copyright holder for this preprint (which was not certified by peer review) is the author/funder. All rights reserved. No reuse allowed without permission.

**A**

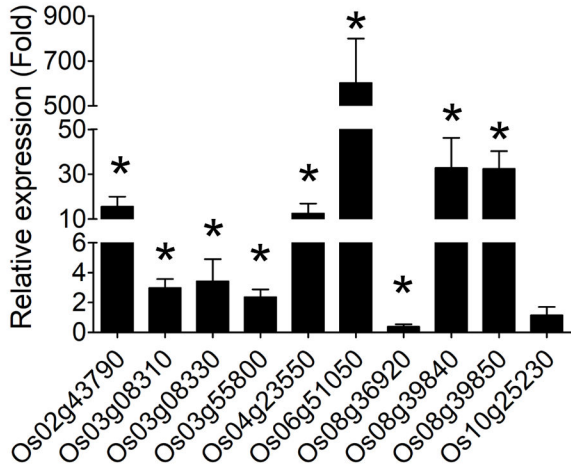

**B**

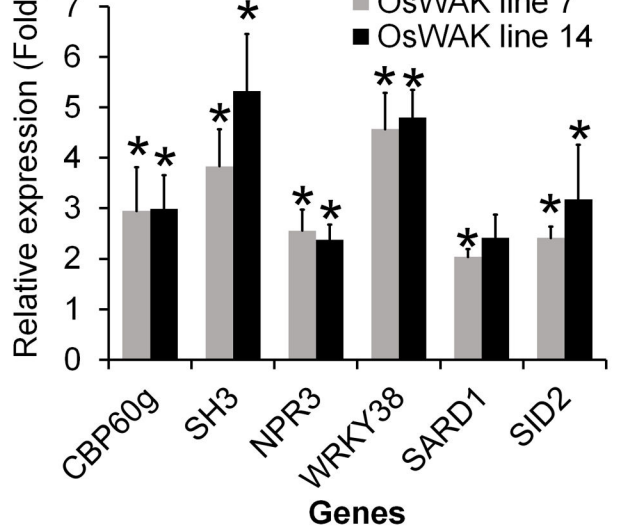

**C**

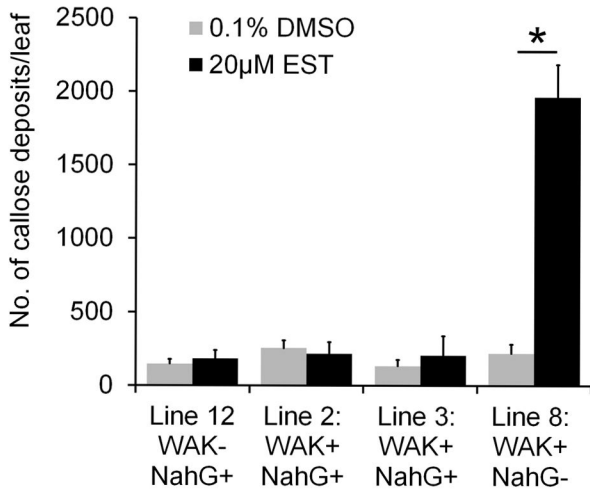

**D**

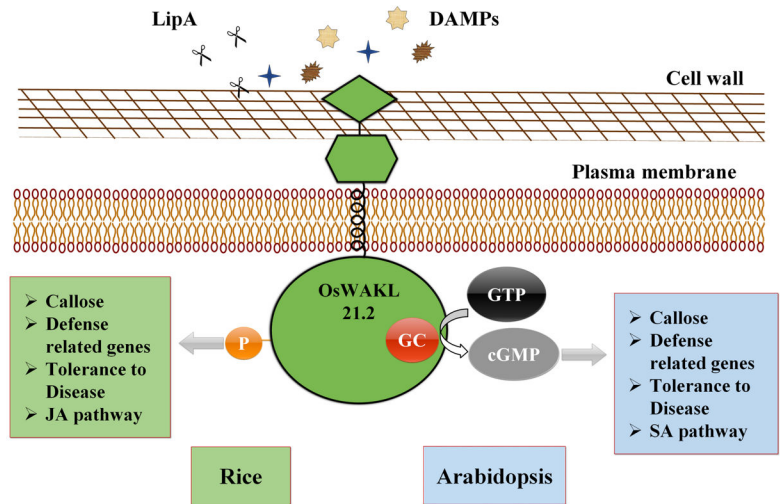

Source: https://www.biorxiv.org/content/10.1101/754234v2.full.pdf
