1 **Short title:**

2 Cell wall damage induced signalling in rice

3 **Article title:**

4 The dual function receptor kinase, OsWAKL21.2, is involved in elaboration of  
5 lipaseA/esterase induced immune responses in rice

6 **Authors:**

7 Kamal Kumar Malukani<sup>1</sup>, Ashish Ranjan<sup>1,2</sup>, Hota Shiva Jyothi<sup>1</sup>, Hitendra K. Patel<sup>1</sup>, Ramesh  
8 V. Sonti<sup>1,3,#</sup>

9 **Authors Affiliation:**

10 <sup>1</sup>CSIR-Centre for Cellular and Molecular Biology, Hyderabad, India, <sup>2</sup>Hyderabad Central  
11 University, Hyderabad, India, <sup>3</sup>National Institute of Plant Genome Research, New Delhi, India.

12 # Corresponding author

13 **Corresponding author e-mail:** [sonti@ccmb.res.in](mailto:sonti@ccmb.res.in)

14 One sentence Summary: (200 characters)

15 A novel rice receptor WAKL21 that sense cell wall damage caused by Xanthomonas secreted  
16 cell wall degrading enzyme to induce immune responses.

17 **Author's contribution:**

18 R.V.S., K.K.M. and A.R. designed the experiments. A.R. and H.K.P. performed microarray.  
19 A.R. and K.K.M. and S.J.H. performed cloning and transient expression studies. K.K.M.  
20 performed publicly available transcriptome analysis, qRT-PCR analysis, Western blotting, and  
21 biochemical characterization experiments and wrote the paper. A.R. and K.K.M. generated  
22 transgenic Arabidopsis lines on which K.K.M. and S.J.H. performed experiments. K.K.M.,  
23 H.K.P. and R.V.S. finalised the manuscript, which was approved by all authors.

24 **Funding Information:**

25 This work was supported by the XII<sup>th</sup> five-year plan project, Plant-Microbe and Soil  
26 Interactions (BSC0117) of the Council of Scientific and Industrial research and J. C. Bose  
27 fellowship to R.V.S. K.K.M. and A.R. acknowledge Council of Scientific & Industrial  
28 Research (CSIR), India for the fellowship.

29 The author responsible for distribution of materials integral to the findings presented in this  
30 article in accordance with the policy described in the Instructions for Authors  
31 ([www.plantcell.org](http://www.plantcell.org)) is: Ramesh V. Sonti ([sonti@ccmb.res.in](mailto:sonti@ccmb.res.in))

32

33

#### 34 **Abstract:**

35 Plant pathogens secrete cell wall degrading enzymes (CWDEs) to degrade various components  
36 of the plant cell wall. Plants sense this cell wall damage as a mark of infection and induce  
37 immune responses. Little is known about the plant functions that are involved in the elaboration  
38 of cell wall damage-induced immune responses. Transcriptome analysis revealed that a rice  
39 receptor kinase, *WALL-ASSOCIATED KINASE-LIKE 21* (*OsWAKL21.2*), is upregulated  
40 following treatment with either *Xanthomonas oryzae* pv. *oryzae* (*Xoo*, a bacterial pathogen) or  
41 LipA, a CWDE of *Xoo*. Downregulation of *OsWAKL21.2* attenuates LipA mediated immune  
42 responses. Overexpression of *OsWAKL21.2* in rice mimics LipA treatment mediated induction  
43 of immune responses and enhanced expression of defence related genes, indicating it could be  
44 involved in the perception of LipA induced cell wall damage in rice. *OsWAKL21.2* is a dual  
45 function kinase having *in-vitro* kinase and guanylate cyclase activities. Ectopic expression of  
46 *OsWAKL21.2* in Arabidopsis also activates plant immune responses. Interestingly,  
47 *OsWAKL21.2* needs kinase activity to activate rice immune responses while in Arabidopsis it  
48 needs guanylate cyclase activity. Our study reveals a novel receptor kinase involved in  
49 elaboration of DAMP induced rice immune responses that can activate similar immune  
50 responses in two different species via two different mechanisms.

#### 51 **Introduction:**

52 The plant cell wall acts as a formidable barrier for pathogens. Plant pathogens secrete a battery  
53 of cell wall degrading enzymes (CWDEs) to degrade different components of the plant cell  
54 wall (Hématy et al., 2009, Albersheim and Anderson-Prouty, 1975). CWDEs act as a double-  
55 edged sword for pathogens as on one hand the activity of these enzymes leads to cell wall  
56 degradation, on the other hand, it releases cell wall degradation products that can elicit plant  
57 immune responses (Jha et al., 2005, Hahn et al., 1981). Such host derived molecules that can  
58 elicit immune responses are called damage associated molecular patterns (DAMPs). Some  
59 known cell wall degradation products that act as DAMPs include pectin degradation products

60 oligogalacturonide (OG), hemicellulose degradation products such as xyloglucan oligomers,  
61 and cellulose degradation products such as cellobiose and cellotriose (Gust et al., 2017, de  
62 Azevedo Souza et al., 2017, Claverie et al., 2018). These DAMPs are sensed by membrane-  
63 localised receptor-like kinases (RLKs) that activate the signaling cascade. Some known  
64 receptors of the DAMPs are AtPEPR1/2 for plant elicitor peptides (Pep), AtDORN1 for eATP,  
65 SYR1 for systemins and AtWAK1/2 for oligogalacturonide (OG) (Brutus et al., 2010, Gust et  
66 al., 2017, Wang et al., 2018).

67 The wall-associated kinases (WAKs) constitute a unique class of receptor kinases which are  
68 known to be closely associated with the plant cell wall (Verica and He, 2002). WAKs are  
69 known to be involved in many physiological processes including cell elongation, pollen  
70 development and abiotic and biotic stress tolerance (Kohorn, 2015). Members of the WAK  
71 gene family have been known to interact with pectin and pectin degradation products (OGs).  
72 AtWAK1 and AtWAK2 have been reported to interact with pectin and OGs *in vitro* (Kohorn  
73 et al., 2006, Kohorn et al., 2009). Some proteins of the WAK gene family have also been known  
74 to be involved in immune responses in many plant species such as Arabidopsis, rice, maize and  
75 wheat (Zhang et al., 2017, Harkenrider et al., 2016, Zuo et al., 2015, Hurni et al., 2015,  
76 Saintenac et al., 2018, Li et al., 2009, He et al., 1998, Hu et al., 2017). In most of the cases, a  
77 receptor kinase or receptor-coreceptor complex recognises the ligand and triggers  
78 phosphorylation events leading to activation of MAP kinase signaling and its downstream  
79 targets (Meng and Zhang, 2013). However, some recent studies also indicate the presence of  
80 an alternate signaling system in plants which is mediated by cyclic nucleotides such as cyclic  
81 guanosine monophosphate (cGMP) and cyclic adenosine monophosphate (cAMP) (Gehring  
82 and Turek, 2017). cGMP is generated by guanylate cyclases (GCs) and most of the reported  
83 plant GCs are membrane localised receptor kinases that also contain a functional GC motif  
84 inside the kinase domain (Gehring and Turek, 2017). Such kinases showing these dual activities  
85 are called moonlighting kinases (Wong et al., 2015). In Arabidopsis, some receptor kinases  
86 including a wall associated kinase like gene (*AtWAKL10*) are reported as such moonlighting  
87 kinases (Meier et al., 2010).

88 Rice (*Oryza sativa*) serves as a staple food for more than half of the world population.  
89 *Xanthomonas oryzae* pv. *oryzae* (*Xoo*) causes the serious bacterial blight disease of rice.  
90 CWDEs secreted by *Xoo* include cellulases, xylanases and lipases/esterases (LipA)  
91 (Rajeshwari et al., 2005, Jha et al., 2007). LipA is an important CWDE of *Xoo* and deletion of  
92 the LipA gene results in a significant reduction in the virulence of *Xoo* in rice (Jha et al., 2007).

93 Treatment of rice tissue with purified LipA leads to the activation of plant immune responses  
94 including callose deposition, programmed cell death and an enhanced tolerance towards *Xoo*  
95 (Aparna et al., 2009). The mechanism of action of LipA on the cell wall is still not clear, but it  
96 has been predicted that it acts by cleaving ester linkages in the rice cell wall (Aparna et al.,  
97 2009). Heat inactivation or mutation of the active site residues of LipA abolishes the  
98 biochemical activity as well as the ability to induce immune responses in rice, indicating that  
99 the enzymatic activity of LipA is essential for the induction of immune response (Jha et al.,  
100 2007, Aparna et al., 2009). However, the process through which rice senses the cell wall  
101 damage caused by LipA and further activates immune responses is not clear. Several receptors  
102 of DAMPs have been reported in the model plant *Arabidopsis*, but none of them in the case of  
103 rice.

104 In this study, transcriptome analysis was initially performed to identify gene expression  
105 changes that occur during LipA induced immune responses in rice. An enhanced transcript  
106 level of a wall-associated kinase like gene, *OsWAKL21.2* was observed after treatment of rice  
107 leaves with either purified LipA or the pathogen, *Xoo*, but not after treatment with a LipA  
108 mutant of *Xoo*. Sequence alignment and biochemical studies indicate that *OsWAKL21.2* is a  
109 dual function receptor kinase that has an *in vitro* kinase as well as a GC activity. *OsWAKL21.2*  
110 is a key component of signaling involved in LipA induced immunity as its downregulation  
111 leads to attenuation of LipA induced immune response. Overexpression of *OsWAKL21.2* in  
112 rice and ectopic expression in *Arabidopsis* induces plant defence response and confers  
113 enhanced tolerance to subsequent bacterial infection. However, we have observed that the  
114 mode of action of the receptor is dissimilar in rice and *Arabidopsis*. Our results suggest that  
115 *OsWAKL21.2* requires its kinase activity to induce immune response in rice, whereas, in  
116 *Arabidopsis*, it requires GC activity.

## 117 **Results:**

### 118 **Expression of *OsWAKL21.2* was enhanced after treatment of rice leaves with LipA**

119 In order to identify rice functions that are potentially involved in early stages of LipA induced  
120 immune responses, we performed transcriptome analysis of rice leaves at 30 minutes and 2hr  
121 after infiltration with LipA. After 30 minutes, no gene was significantly altered while 78 genes  
122 (74 unique set of genes) were differentially expressed (68up, 10 down) (>1.5 fold) after 2hr of  
123 LipA treatment (Supplemental Fig. S1A, Supplemental Table 1). Pathway analysis using  
124 MapMan indicates that more than one-third (31/78) of these genes might have roles in

125 signaling, defence responses or in transcription/translation (Supplemental Fig. S1B). When  
126 compared with a previous microarray (Ranjan et al., 2015) performed after 12hr of LipA  
127 treatment, we observed 38 of these 78 genes are differentially expressed (37up, 1 down) at both  
128 time points (Fig. 1A) (Supplemental Table 2). We compared with a publicly available  
129 microarray dataset that was performed 24hr after treatment of rice leaves with various  
130 *Xanthomonas oryzae* strains (GEO Acc. No. GSE36272), we observed some of these 38 genes  
131 were commonly upregulated following *Xanthomonas oryzae* treatment (Supplemental Table  
132 3). The upregulation of six of these commonly upregulated genes was validated by qRT-PCR  
133 after treatment of rice leaves with either *Xoo* or LipA (Supplemental Fig. S1C). Three of the  
134 37 genes that were most commonly upregulated after *Xanthomonas* treatments include a  
135 putative wall-associated receptor kinase like gene (*OsWAKL21*, LOC\_Os12g40419), a putative  
136 ubiquitin ligase (*OsPUB38*, LOC\_Os04g35680) and a putative fructose-bisphosphate aldolase  
137 (LOC\_Os08g02700) (Supplemental Table 3). Since our focus was on the perception of cell  
138 wall damage in rice plants, we decided to explore further the function of wall-associated  
139 receptor kinase *OsWAKL21*.

140 *OsWAKL21* has three splice variants [*OsWAKL21.1* (LOC\_Os12g40419.1), *OsWAKL21.2*  
141 (LOC\_Os12g40419.2) and *OsWAKL21.3* (LOC\_Os12g40419.3)] (Fig. 1B). qRT-PCR  
142 analyses indicate that the second splice variant (*OsWAKL21.2*) is mainly upregulated in rice  
143 leaves after either LipA or *Xoo* treatment (Fig. 1C). Interestingly, treatment of rice leaves with  
144 LipA mutant of *Xoo* did not enhance expression of *OsWAKL21.2* while introduction of a LipA  
145 complementing clone into the LipA mutant restores the ability to enhance expression of  
146 *OsWAKL21.2* (Fig. 1D). Microarray data and qRT-PCR also revealed that out of the three  
147 splice variants, the expression level of *OsWAKL21.2* is higher in leaves as compared to the  
148 other two splice variants (Data not shown).

#### 149 **Overexpression of *OsWAKL21.2* in rice mimics LipA induced immune responses**

150 Treatment of rice tissue with LipA induces immune responses such as callose deposition,  
151 enhanced expression of defence related genes, activation of JA pathway and enhanced  
152 tolerance against subsequent *Xoo* infection (Jha et al., 2007, Ranjan et al., 2015).  
153 *Agrobacterium* mediated transient overexpression of *OsWAKL21.2* in young rice leaves  
154 significantly induces callose deposition which is comparable to callose deposition induced by  
155 LipA treatment (Fig. 2A,B). Transient overexpression of *OsWAKL21.2* in rice leaves also  
156 enhances tolerance against subsequent *Xoo* infection leading to reduced lesion length caused

157 by *Xoo* which is also observed following treatment with LipA (Fig. 2C, Supplemental Fig.  
158 S2A). The overexpression of *OsWAKL21.2* was confirmed by qRT-PCR and Western blot  
159 analysis (Supplemental Fig. S1B,C).

160 Plant immune responses are known to be modulated via the expression of defence-related  
161 genes. Therefore, we tested the expression of some key defence-related genes of rice after the  
162 transient overexpression of *OsWAKL21.2* in mid-veinal regions of rice leaves. *OsWAKL21.2*  
163 overexpression in rice enhances expression of three pathogenesis-related genes (*OsPRIa*,  
164 *OsPRI0/OsPBZ14* and *OsPRI0a/OsPBZ1*), a somatic embryogenesis receptor kinase  
165 (*OsSERK2*) and a phenylalanine ammonia lyase (*OsPAL3*) (Fig. 2D). We also tested expression  
166 of 10 genes that are upregulated following LipA/*Xoo* treatment (Supplemental Table 3) in  
167 microarray and observed seven of these ten genes are also significantly upregulated following  
168 overexpression of *OsWAKL21.2* in rice (Supplemental Fig. S2D). These results indicate that  
169 Agrobacterium-mediated transient overexpression of *OsWAKL21.2* in rice leaves mimics LipA  
170 treatment in terms of induction of callose deposition, enhanced tolerance against subsequent  
171 *Xoo* infection and enhances expression of defence-related genes and a number of the LipA  
172 responsive genes.

### 173 **Transient downregulation of *OsWAKL21.2* attenuates LipA induced immune responses** 174 **in rice**

175 We next checked the effect of transient knockdown of *OsWAKL21.2* by Virus-induced gene  
176 silencing (VIGS) on LipA induced immune responses. It was observed that the downregulation  
177 was not retained by all leaves for a long time which was also observed previously using this  
178 vector system (Kant and Dasgupta, 2017). So, an alternative approach was used for assessment  
179 of callose deposition after LipA treatment (Supplemental Fig. S3). We categorized the leaf  
180 samples qualitatively into three classes based on the amount of callose deposition as low,  
181 medium and high callose deposits (Low<30 deposits/leaf, Medium~30-80 deposits/leaf or  
182 High>80 deposits/leaf) (Fig. 3A). Following LipA treatment, about 30-40% of the leaf samples  
183 showed high callose deposition, 10-15% showed low callose deposition while the rest of them  
184 (about 50%) showed a medium level of callose deposition (Fig. 3B). A similar ratio was  
185 observed if the seedlings were previously treated with VIGS-EV (Fig. 3C). The number of  
186 leaves showing low callose deposition significantly increased to more than 50% in WAKL-  
187 RNAi lines (WRI 1-300, WRI 450-600 and WRI 1-600 correspond to the fragment of  
188 *OsWAKL21.2* that was used for downregulation) while there was a reduction in the leaves that

189 showed high or medium callose deposition (Fig. 3C). In RNAi lines, the leaves that show low  
190 callose deposition following LipA treatment also show significantly lower transcript/protein  
191 level of *OsWAKL21.2* which was not observed in the leaves that show high callose deposition  
192 (Fig. 3D, Supplemental Fig. S4A).

193 Prior treatment of the mid-vein of rice leaves with LipA or the overexpression of *OsWAKL21.2*  
194 enhances tolerance of the plant against subsequent *Xoo* infection. We decided to check if the  
195 downregulation of *OsWAKL21.2* in rice enhances susceptibility towards *Xoo* or affects LipA  
196 induced tolerance towards *Xoo*. VIGS mediated transient downregulation of *OsWAKL21.2* in  
197 rice mid vein attenuates LipA induced enhanced tolerance against subsequent *Xoo* infection  
198 (Fig. 3E, Supplemental Fig. S4B). qRT-PCR and Western blotting studies using anti-  
199 *OsWAKL21* antibodies indicated the downregulation of *OsWAKL21.2* in the mid vein  
200 following VIGS mediated *OsWAKL21.2* downregulation (Fig. 3F, Supplemental Fig. S4C).  
201 There was slight but usually non-significant reduction on transcript level of other splice  
202 variants and no significant difference was observed in transcript level of other predicted off-  
203 target genes (Supplemental Fig.S5). This suggests that optimal expression of *OsWAKL21.2* in  
204 rice leaves is required for LipA induced tolerance against *Xoo*.

## 205 **Ectopic expression of *OsWAKL21.2* in transgenic Arabidopsis lines induces plant immune** 206 **responses**

207 In order to determine whether expression of *OsWAKL21.2* would activate immune responses  
208 in other plants, we generated stable Arabidopsis transgenic lines expressing *OsWAKL21.2*  
209 under a 17- $\beta$ -estradiol (Est) inducible promoter. Expression of *OsWAKL21.2* in transgenic lines  
210 was examined after treatment with the inducer through qRT-PCR and Western blotting  
211 (Supplemental Fig. S6A,B). We observed that ectopic expression of *OsWAKL21.2* in  
212 Arabidopsis also results in an enhanced callose deposition (Fig. 4A,B). Ectopic expression of  
213 *OsWAKL21.2* in Arabidopsis also enhances tolerance against subsequent *Pseudomonas*  
214 *syringae* pv. *tomato* DC3000 (*Pst* DC3000) infection leading to reduction in *in planta* growth  
215 of *Pst* DC3000 (Fig. 4C). In Arabidopsis, the Salicylic acid (SA) and Jasmonic acid (JA)  
216 pathways are widely known to be involved in immune responses. We examined the expression  
217 of key genes linked to these pathways in Arabidopsis transgenic lines. The ectopic expression  
218 of *OsWAKL21.2* in Arabidopsis resulted in a significant increase in the transcript levels of key  
219 SA pathway-related genes (*AtPR2*, *AtPR5*, and *AtWRKY33*) and *AtGSL5*, a major callose  
220 synthase of Arabidopsis (Fig. 4D) (Jacobs et al., 2003, Janda and Ruelland, 2015). The

221 transcript level of the key JA responsive gene *AtPDF1.2* was found to be decreased, indicating  
222 that the JA pathway might be downregulated in Arabidopsis following *OsWAKL21.2*  
223 expression (Fig. 4D). Overall, this data implies that in Arabidopsis, *OsWAKL21.2* enhances  
224 callose deposition, enhanced expression of SA pathway related genes, and in addition,  
225 enhances tolerance against subsequent *Pst* DC3000 infection.

### 226 **OsWAKL21.2 is a membrane localizing moonlighting receptor kinase having *in vitro*** 227 **kinase and guanylate cyclase activities**

228 Sequence analysis of *OsWAKL21.2* indicated that it is a receptor-like serine/threonine kinase  
229 that accommodates an N-terminal extracellular galacturonan binding domain (GBD), an  
230 epidermal growth factor (EGF) like repeat and an intracellular C-terminal kinase domain,  
231 resembling other known wall-associated kinases (Fig. 5A). The analyses of *OsWAKL21.2* also  
232 revealed the presence of a putative guanylate cyclase (GC) motif inside the kinase domain  
233 (Supplemental Fig. S7A,C). The tool ‘GCpred’ also predicted the presence of a plant GC motif  
234 (from residue 569-585) inside the kinase domain of *OsWAKL21.2* (Supplemental Fig. S7B)  
235 (Xu et al., 2018). EGFP tagged recombinant *OsWAKL21.2*:EGFP localize to the cell  
236 membrane in onion epidermal cell indicating it is a membrane bound receptor (Fig. 5B).

237 The biochemical characterization was performed by cloning the intracellular kinase domain of  
238 *OsWAKL21.2* (*OsWAKL21*<sub>376-725</sub>) with an N-terminal 6x His tag and expressing it in *E. coli*  
239 cells. The purified cytoplasmic domain of *OsWAKL21.2* showed an autophosphorylation  
240 activity when incubated with  $\gamma$ -<sup>32</sup>P-ATP indicating that it is an active kinase (Fig. 5C). For the  
241 guanylate cyclase activity, the same purified protein was incubated with GTP and cGMP was  
242 detected by qualitative and quantitative assays. cGMP was detected only when GTP was  
243 incubated with purified *OsWAKL21*<sub>376-725</sub> (Fig. 5D, Supplemental figure S7D). The rate of  
244 cGMP synthesis was  $2.1 \pm 0.75$  pM/ $\mu$ g protein/hr (Fig. 5D) which is comparable to other known  
245 plant GCs such as *AtPEPR1*, *AtPSKR1* and *AtGC1*. The biochemical analyses strongly  
246 suggests that *OsWAKL21.2* is a dual-function enzyme having kinase and guanylate cyclase  
247 activity.

### 248 **Kinase activity of OsWAKL21.2 is essential for induction of immune responses in rice** 249 **but not in Arabidopsis**

250 Considering that *OsWAKL21.2* is a receptor kinase, we hypothesized that kinase activity of  
251 the protein would be required for the induction of immune responses. Based on homology with  
252 other plant receptor kinases, we mutated four active site residues (K407, D507, T542, T547)



253 to alanine and generated a kinase-deficient mutant (OsWAKL21.2-kinase deficient or  
254 *OsWAKL21.2-kd*). Purified kinase domain of OsWAKL21.2-kd had almost lost kinase activity  
255 but it retains GC activity (Supplemental Fig. S8A,B,C). Furthermore, we observed that  
256 *Agrobacterium*-mediated transient overexpression of the full-length OsWAKL21.2-kd in rice  
257 leaves neither enhanced callose deposition nor affected tolerance towards *Xoo* (Fig. 6A,B, and  
258 Supplemental Fig. S9A,B). *OsWAKL21.2-kd* also did not enhance the expression of key  
259 defence-related genes (Fig. 6C), thus indicating that the kinase activity of OsWAKL21.2 is  
260 required for induction of immune responses in rice.

261 In order to further investigate the role of the kinase activity of OsWAKL21.2 in the induction  
262 of plant immune responses, we generated transgenic *Arabidopsis* lines expressing  
263 *OsWAKL21.2-kd*. Interestingly, we observed that the ectopic expression of *OsWAKL21.2-kd*  
264 in *Arabidopsis* caused an increase in callose deposition (Fig. 6D, Supplemental Fig. S9C,D).  
265 Similar results were observed in four different transgenic lines. In *Arabidopsis*, the expression  
266 of *OsWAKL21.2-kd* increased tolerance towards *Pst* DC3000 and also changed the expression  
267 of defence-related genes in a similar pattern as *OsWAKL21.2* (Fig. 6E,F). As mentioned above,  
268 this mutant did not induce immune responses in rice, indicating that the kinase activity of  
269 OsWAKL21.2 is vital for the induction of immune responses in rice but not in *Arabidopsis*.

### 270 **GC activity of *OsWAKL21.2* is required for induction of immune responses in** 271 ***Arabidopsis* but not in rice**

272 Owing to the fact that the kinase-deficient mutant of *OsWAKL21.2* induced immune responses  
273 in *Arabidopsis*, we decided to investigate whether the GC activity of OsWAKL21.2 might have  
274 role in induction of immune responses in *Arabidopsis*. In order to test this hypothesis, we  
275 initially induced the expression of *OsWAKL21.2* in *Arabidopsis* in the presence of a GC  
276 inhibitor LY83583 and observed that the GC inhibitor attenuates *OsWAKL21.2* and  
277 *OsWAKL21.2-kd* induced callose deposition in *Arabidopsis* (Supplemental Fig. S10). In order  
278 to confirm this, we generated a mutant of OsWAKL21.2 that lacked the GC activity  
279 (*OsWAKL21.2-GC* Deficient or *OsWAKL21.2-gcd*) but retained the kinase activity  
280 (Supplemental Fig. S8A,B,C) (Ma et al., 2012). Ectopic expression of *OsWAKL21.2-gcd* did  
281 not induce either callose deposition or enhance tolerance towards *Pst* DC3000 (Fig. 7A,B, and  
282 Supplemental Fig. S9C,D). Furthermore, *OsWAKL21.2-gcd* failed to significantly alter the  
283 expression of most of the defence-related genes that are differentially regulated by  
284 *OsWAKL21.2* in *Arabidopsis* (Fig. 7C). Ectopic expression of *OsWAKL21.2* in *Arabidopsis*

285 leaves also enhances in planta cGMP level which was not observed when *OsWAKL21.2-gcd*  
286 was expressed in transgenic Arabidopsis plants (Supplemental Fig. S11A,B,C). However,  
287 transient overexpression of *OsWAKL21.2-gcd* induces immune responses in rice that were  
288 similar to the ones induced by the wild-type *OsWAKL21.2* (Fig. 7D,E,F, Supplemental Fig.  
289 S9A,B). These observations clearly indicated that the GC activity of *OsWAKL21.2* is essential  
290 for induction of Arabidopsis immune responses but not for induction of immune responses in  
291 rice.

### 292 ***OsWAKL21.2* possibly induces the JA pathway in rice while it activates SA pathway in** 293 **Arabidopsis**

294 The results in this study indicated that kinase activity of *OsWAKL21.2* is required to induce  
295 rice immune responses and that the GC activity is required for induction of Arabidopsis  
296 immune responses. Our previous report indicated that the JA pathway is activated in rice leaves  
297 after treatment with LipA (Ranjan et al., 2015). We selected a subset of ten genes that were  
298 earlier predicted to be associated with the JA pathway in rice and were found to be upregulated  
299 after 12hr of LipA infiltration (Ranjan et al., 2015). We tested the expression of these 10 genes  
300 and observed that 8 out of 10 genes showed significant upregulation after *OsWAKL21.2*  
301 overexpression (Fig. 8A). This indicates that overexpression of *OsWAKL21.2* in rice enhances  
302 expression of JA pathway related genes.

303 The results above (Fig. 4D) suggested that expression of SA related genes was enhanced after  
304 ectopic expression of *OsWAKL21.2* in Arabidopsis. We further tested the expression of some  
305 more SA pathway related Arabidopsis genes (*AtSID2*, *AtCBP60g*, *AtSARD1*, *AtSH3*, *AtNPR3*  
306 and *AtWRKY38*) after ectopic expression of *OsWAKL21.2* and observed significantly enhanced  
307 expression of these genes (Fig. 8B). In order to validate the role of the SA pathway in  
308 *OsWAKL21.2* induced immune responses in Arabidopsis, we made the crosses between  
309 *OsWAKL21.2* transgenic lines with *NahG* transgenic lines that do not accumulate SA (Delaney  
310 et al., 1994). Transgenic offspring lines that express both *OsWAKL21.2* and *NahG* did not show  
311 enhanced callose deposition while sister lines that expressed only *OsWAKL21.2* showed  
312 enhanced callose deposition after treatment with estradiol (Fig. 8C, Supplemental Fig. S11C).  
313 This observation indicated that *OsWAKL21.2* induces immune responses in Arabidopsis via  
314 activation of the SA pathway.

315

316

## 317 **Discussion:**

318 CWDEs are important virulence factors secreted by microbial plant pathogens. *Xoo* secretes  
319 numerous CWDEs to degrade the rice cell wall and treatment of rice with *Xoo* secreted purified  
320 CWDEs such as Cellulase A (ClsA), Cellobiosidase (CbsA) and Lipase/esterase (LipA) leads  
321 to activation of plant immune responses (Jha et al., 2007). Earlier we have shown that the  
322 biochemical activity of LipA is required for the induction of rice immune responses (Aparna  
323 et al., 2009). This indicates that the rice plant is capable of recognizing cell wall degradation  
324 products as DAMPs and further induce immune responses. The molecular players involved in  
325 the perception of cell wall damage caused by CWDEs in rice is yet to be deciphered. To discern  
326 the functions involved in LipA induced immune responses, we performed transcriptome  
327 analyses at various time points following LipA treatment. Comparison with online available  
328 microarray indicates a handful of genes that are commonly upregulated following LipA or *Xoo*  
329 treatment. One such gene was the second splice variant of a rice Wall-associated kinase-like  
330 gene 21 (*OsWAKL21.2*). The wall-associated kinase (WAK) is the only gene family known to  
331 recognize plant cell wall-derived DAMPs (Kohorn, 2015). Our study suggests that the  
332 expression of *OsWAKL21.2* is enhanced after treatment of rice leaves with either LipA or *Xoo*  
333 but not after treatment with a LipA mutant of *Xoo*. This indicates that the increase in  
334 *OsWAKL21.2* expression after *Xoo* treatment is specifically because of the presence of LipA  
335 in *Xoo*. We also observed that it is a membrane localized receptor kinase having in vitro kinase  
336 and guanylate cyclase activity.

337 Downregulation of some WAK gene family members in rice such as *OsWAK14*, *OsWAK91*,  
338 *OsWAK92* or *Xa4-WAK* have been reported to enhance the susceptibility of rice plants towards  
339 subsequent infection (Delteil et al., 2016, Hu et al., 2017). We downregulated the expression  
340 of *OsWAKL21.2* in rice leaves using VIGS. Although downregulation of *OsWAKL21.2* did not  
341 alter susceptibility against *Xoo*, it attenuated LipA induced tolerance to *Xoo* and callose  
342 deposition in rice indicating that it is a key component of signaling activated after LipA  
343 treatment. Our previous observation suggests that it is the activity and not the structure of LipA  
344 that is required for induction of immune responses in rice indicating the role of DAMPs in  
345 LipA induced immunity (Jha et al., 2007, Aparna et al., 2009). Some WAKs are already  
346 reported as receptors of DAMPs (OGs) in Arabidopsis (Kohorn et al., 2009, Brutus et al.,  
347 2010). *OsWAKL21.2* is a receptor that is induced after the LipA treatment at early and late time  
348 points and is essential for the recognition of cell wall damage induced by LipA indicating it  
349 might be an upstream component in signalling activated following LipA treatment.

350 Treatment of rice leaves with LipA leads to callose deposition, activation of JA pathway,  
351 enhanced expression of some defence related genes and enhanced tolerance against subsequent  
352 *Xoo* infection (Ranjan et al., 2015, Jha et al., 2007). Callose deposition is a hallmark of the  
353 immune response that is observed after treatment of the plant tissue with CWDEs (including  
354 LipA) or DAMPs (Jha et al., 2007, Galletti et al., 2008). We also observed that the  
355 overexpression of *OsWAKL21.2* in rice and ectopic expression in Arabidopsis leaves leads to  
356 the fortification of the cell wall in the form of callose deposition. Activation of the immune  
357 response leads to an increased tolerance towards subsequent infection in plants. We also  
358 observed that *OsWAKL21.2* induced immune responses lead to enhanced tolerance against  
359 subsequent bacterial infection in rice and Arabidopsis. Overexpression of several other WAKs  
360 such as *OsWAK1* (Li et al., 2009), *OsWAK25* (Harkenrider et al., 2016), *OsWAK14*, *OsWAK91*  
361 or *OsWAK92* (Delteil et al., 2016), *AtWAK2* (Kohorn et al., 2009), *AtWAK1* (Brutus et al.,  
362 2010), and *Ta-WAKL4* (Saintenac et al., 2018) has been reported to enhance tolerance towards  
363 subsequent infections in different plant species. Immune responses are usually correlated with  
364 enhanced expression of defence-related genes. The overexpression of *OsWAKL21.2* in the mid-  
365 vein of rice leaves enhanced the expression of five defence-related and LipA responsive genes.  
366 The key defence-related genes upregulated by *OsWAKL21.2* overexpression include *OsPRIa*  
367 (*Park et al., 2008*), *OsPR10a* (*Bai et al., 2011*), *OsPR10* (*Harkenrider et al., 2016*), *OsSERK2*  
368 (*Chen et al., 2014*) and *OsPAL3* (*Chen et al., 2018*) which are well categorized as defence-  
369 related genes implicated in tolerance against *Xoo*. Interestingly, four of these five key defence  
370 genes (except *OsPRIa*) that are upregulated by *OsWAKL21.2* overexpression are also  
371 upregulated after 12hr of LipA treatment in a microarray that was earlier done in the lab  
372 (Ranjan et al., 2015). Overexpression of *OsWAKL21.2* also enhances the expression of most of  
373 the tested LipA responsive genes (7/10) and most of the tested JA pathway related LipA  
374 responsive genes (8/10) indicating that the overexpression of *OsWAKL21.2* partially mimics  
375 LipA treatment condition. These results establish that the overexpression of *OsWAKL21.2* in  
376 rice mimics the LipA treatment condition in rice plants leading to callose deposition, enhanced  
377 expression of JA pathway related genes, enhanced tolerance against *Xoo* and the increased  
378 expression of defence-related genes. This indicates that *OsWAKL21.2* could be a major  
379 upstream component in the signaling process that is activated after cell wall damage caused by  
380 LipA.

381 Ectopic expression of *OsWAKL21.2* leads to enhanced expression of the SA responsive genes  
382 such as *AtPR2*, *AtPR5* and *AtWRKY33* and downregulation of the JA responsive gene,

383 *AtPDF1.2* indicating that *OsWAKL21.2* likely activates the SA pathway in Arabidopsis. We  
384 observed enhanced expression of several other SA biosynthesis-, regulation- and response-  
385 related genes in Arabidopsis (*AtSID2*, *AtSARD1*, *AtCBP60G*, *AtNPR3*, *AtWRKY33*, *AtWRKY38*  
386 and *AtSH3*) (Janda and Ruelland, 2015). Activation of SA pathway in Arabidopsis enhances  
387 expression of biotic stress-responsive callose synthase *AtGSL5* (Dong et al., 2008) which was  
388 also upregulated following ectopic expression of *OsWAKL21.2*. We also found that the  
389 transgenic plants expressing *OsWAKL21.2* and *NahG* did not show callose deposition,  
390 demonstrating that SA accumulation is required for *OsWAKL21.2* induced immune response  
391 in Arabidopsis. These outcomes also explain the enhanced tolerance towards *Pst* DC3000, as  
392 an activation of the SA pathway in Arabidopsis leads to increased tolerance towards *Pst*  
393 DC3000 (Xin and He, 2013). The results indicate that *OsWAKL21.2* when expressed  
394 ectopically in Arabidopsis acts as a defence gene and activates SA pathway-mediated immune  
395 responses. Some members of the WAK gene family in Arabidopsis such as *AtWAK1*, *AtWAK2*,  
396 *AtWAK3*, *AtWAK5* and *AtWAKL10* are known as SA responsive genes treatment with SA leads  
397 to the enhanced expression of these genes indicating correlation of SA pathway and WAKs in  
398 Arabidopsis (He et al., 1998, He et al., 1999, Meier et al., 2010).

399 Ligand binding onto receptor kinases triggers phosphorylation that is further conveyed  
400 downstream via phosphorylation by/of kinases and their targets (Macho and Zipfel, 2014). Few  
401 receptor kinases such as *AtBRI1*, *AtPSKR1*, *AtPEPR1*, *AtWAKL10* and *HpPEPR1* are also  
402 known to possess dual enzymatic activity i.e. they possess GC activity along with kinase activity  
403 (Ma et al., 2012, Gehring and Turek, 2017, Swiezawska et al., 2017, Swiezawska et al., 2015,  
404 Meier et al., 2010). *OsWAKL21.2* also possess such dual activity which is comparable with  
405 other plant GCs. Treatment with a GC inhibitor and mutations in active site residues of the GC  
406 motif showed that the GC activity of *OsWAKL21.2* is required to induce immune responses in  
407 Arabidopsis but not in rice. GCs convert GTP to cGMP which acts as a secondary signaling  
408 molecule (Gehring and Turek, 2017). Overexpression of plant GCs *AtBRI1*, *AtPSKR1* and  
409 *AtPEPR1* in Arabidopsis leads to a partial increase in cytoplasmic cGMP concentrations  
410 (Gehring and Turek, 2017). Similarly, we have also observed that the ectopic expression of  
411 *OsWAKL21.2* in Arabidopsis leads to a significant increase in the concentration of *in planta*  
412 cGMP. Some of the moonlighting kinases such as *AtPEPR1*, *AtBRI1* and *AtPSKR1* are already  
413 known for their direct or modulatory role in Arabidopsis immune responses (Lozano-Durán  
414 and Zipfel, 2015, Igarashi et al., 2012). *AtPEPR1* is receptor of DAMP (Pep's) and its GC  
415 activity is required for activation of immune responses (Ma et al., 2012). *AtWAKL10* has also

416 been predicted as a defence-related gene that is similar to *OsWAKL21.2*. These observations  
417 testify the possible involvement of GCs in Arabidopsis immune response. We have found that  
418 in rice, *OsWAKL21.2* requires the kinase activity for its function, whereas, in Arabidopsis, it  
419 requires the GC activity. This does not rule out possible role of GC activity of *OsWAKL21* in  
420 rice as it might be involved in some other functions not studied here or is required for other  
421 splice variants of this gene.

422 CWDEs secreted by *Xoo* cause degradation of the rice cell wall that leads to the release of cell  
423 wall derived DAMPs. These DAMPs, in turn, induce rice immune responses, but the  
424 mechanisms by which these DAMPs are perceived and recognized are obscure. Employing a  
425 variety of analyses, we have found that the rice receptor kinase *OsWAKL21.2* is required for  
426 the activation of plant immune responses post-LipA treatment. This suggests that *OsWAKL21.2*  
427 could be either a receptor or a co-receptor for cell wall damage and possibly the first DAMP  
428 receptor identified in rice. Overexpression of *OsWAKL21.2* in plants induces immune  
429 responses and enhances tolerance towards hemibiotrophic pathogens. We observed that this  
430 receptor kinase is a moonlighting kinase having *in vitro* guanylate cyclase activity along with  
431 kinase activity making it one of the few moonlighting kinases known in plants and the first one  
432 in rice. An interesting observation about *OsWAKL21.2* is that for the induction of immune  
433 responses in rice, the kinase activity is required, but in Arabidopsis, the guanylate cyclase  
434 activity is needed. Fig. 8D represents a mechanistic model of the role of *OsWAKL21.2* in the  
435 induction of immune responses in rice and Arabidopsis. Future studies would be aimed at  
436 identifying interacting partners of *OsWAKL21.2* that are involved in elaboration of LipA  
437 induced immune responses. Furthermore, the possibility of using this gene to provide enhanced  
438 tolerance to bacterial pathogens in a variety of crops including monocots and dicots can be  
439 explored.

## 440 **Materials and Methods:**

### 441 **Plant materials and growth conditions**

442 Rice (*Oryza sativa* ssp. *indica*) variety TN1 (Taichung native 1) which is susceptible to  
443 *Xanthomonas oryzae* pv. *oryzae* (*Xoo*) was used for plant experiments. All the rice experiments  
444 were performed in either the growth chamber (12hr Day//Night) or greenhouse at 28°C.  
445 *Arabidopsis thaliana* ecotype Columbia (Col-0) and *NahG* lines were used for Arabidopsis  
446 experiments. Transgenic lines were generated using the floral dip method (Clough and Bent,  
447 1998). Transgenic plants were selected by adding hygromycin and/or kanamycin (*NahG* lines)

448 to the final concentration of 20µg/ml or 50µg/ml respectively. Plants were maintained in  
449 growth chamber at 22°C day and 18°C night temperature at about 70% humidity and with 12hr  
450 day/night cycle. Leaves of 4-5-week-old plants that are in rosette state were used for  
451 experiments.

#### 452 **Bacterial cultures**

453 *Xoo* wild type strain BXO43 (lab isolate) was used as a rice pathogen. The LipA mutant  
454 (BXO2001) of *Xoo* (BXO43) and its complemented strain (BXO2008) was also used in this  
455 study (Rajeshwari et al., 2005). *Pseudomonas syringae* pv. *tomato* DC3000 (*Pst* DC3000) was  
456 used as an Arabidopsis pathogen. Transient transformation in rice and floral dip of Arabidopsis  
457 was performed using *Agrobacterium tumefaciens* strain LBA4404. *E. coli* BL21-AI was used  
458 for recombinant protein expression for biochemical assays.

#### 459 **LipA purification from *Xoo***

460 *Xoo* BXO2008, a LipA overproducing strain derived from BXO2001 was used for LipA  
461 overproduction and purification and LipA was purified by the protocol described previously  
462 (Aparna et al., 2007). The purity and activity of the enzyme was tested by running on a SDS-  
463 PAGE gel and by activity on tributyrin containing plates.

#### 464 **Microarray analysis**

465 The leaf treatment and microarray analysis was performed as described previously (Ranjan et  
466 al., 2015). RNA was isolated from 25-30 leaves after 30min or 2hr of treatment with LipA  
467 (0.5mg/ml) or buffer. Processed data and ‘.cel’ files were also submitted to gene expression  
468 omnibus (GEO-NCBI, Acc. No. GSE53940). RMA and PLIER16 algorithms were used for  
469 analysis and probes showing significant differential expression ( $FC \geq 1.5$ -fold and  $p < 0.05$ ) in  
470 both analyses were considered as differentially expressed genes.

#### 471 **Vector construction and site-directed mutagenesis**

472 Gateway™ cloning technology was used for cloning. *OsWAKL21.2* was amplified using rice  
473 cDNA and cloned into pENTR-D-TOPO (Invitrogen™). The gene was subcloned using LR  
474 clonase reaction (Invitrogen™) into pMDC7 plasmid (Curtis and Grossniklaus, 2003) for plant  
475 expression studies and in pH7FWG2 plasmid (Karimi et al., 2002) for localization experiments.  
476 In pMDC7, the target gene sequence is cloned downstream to XVE promoter, which is 17-β-  
477 estradiol inducible. 20µM of 17-β-estradiol (Sigma Aldrich) was used in all overexpression  
478 studies as an inducer while 0.1% DMSO was used as a control (uninduced condition). Kinase  
479 domain *OsWAKL21*<sub>376-725</sub> was cloned into bacterial expression vector pDEST17 (Invitrogen)  
480 and transformed into *E. coli* BL21-AI for recombinant protein expression. The constructs in  
481 pENTR-D-TOPO were used for site-directed mutagenesis (Zheng et al., 2004). The mutant

482 versions were then transferred into desired destination vectors using LR clonase reaction. All  
483 the clones and mutations were confirmed using Sanger sequencing. All the plant expression  
484 constructs were introduced into *Agrobacterium tumefaciens* strain LBA4404.  
485 LBA4404:XVE<sub>pro</sub>:*OsWAKL21.2*, LBA4404:XVE<sub>pro</sub>:*OsWAKL21.2*-kd and  
486 LBA4404:XVE<sub>pro</sub>:*OsWAKL21.2*-gcd were used for transient transformation in rice and for  
487 generation of Arabidopsis transgenic lines.

#### 488 **Callose deposition assay in rice and Arabidopsis**

489 For callose deposition assay in rice, 12-14 days old leaves were used for *Agrobacterium*-  
490 mediated transient transformation (Pillai et al., 2018, Jha et al., 2010). The suspension was  
491 infiltrated in third rice leaf using a needleless 1ml syringe with inducer [20µM 17-β-estradiol;  
492 (Est), Sigma-Aldrich] or control (0.1% DMSO). Leaves collected for callose deposition were  
493 stained with aniline blue according to Millet et al. (2010) (Millet et al., 2010). Callose  
494 deposition was visualized under blue light (excitation wavelength 365nm) in ECLIPSE Ni-E,  
495 epifluorescence microscope (Nikon, Japan) with 10X magnification. Eight images (~1mm<sup>2</sup>  
496 each) were captured from each leaf from the zone of infiltration and proximal region. The  
497 number of callose deposits in all eight images for a leaf was added to get callose deposition per  
498 leaf (per 8mm<sup>2</sup>). Average was calculated for 10-12 leaves for each treatment.

499 For callose deposition in Arabidopsis transgenic plants, similar size of rosette stage leaves were  
500 infiltrated either with 100µl of 0.1%DMSO or 20µM estradiol using the needleless 1.0 ml  
501 syringe. After 12hr, leaves were collected and stained for callose deposition and observed under  
502 the microscope as mentioned above for rice. Nearly 40-50 images per leaf were captured and  
503 the number of callose deposits in each image was added to get number of callose deposits in  
504 one leaf. For each sample average was calculated for 3 such leaves obtained from three separate  
505 plants.

#### 506 **Virulence assay in rice and Arabidopsis**

507 About 60 days old TN1 rice plants were used for infection of *Xoo*. For transient overexpression  
508 in rice mid-vein, 200µl actively growing *Agrobacterium* (LBA4404) resuspended in 10mM  
509 MES + 10mM MgCl<sub>2</sub> + 200µM acetosyringone (final OD 0.8) [with or without inducer (20µM  
510 17-β-estradiol)] was injected using a 1.0 ml syringe. After 24hr, about 1cm above  
511 *Agrobacterium* injection site, the mid-veins of leaves were pin-pricked with needle touched to  
512 fresh *Xoo* colony. Lesion length caused by *Xoo* was measured after 10 days of *Xoo* infection.  
513 *Pseudomonas syringae* pv. *tomato* (*Pst* DC3000) was used for infection in Arabidopsis leaves.  
514 Similar size leaves from five different rosette stage plants were infiltrated with either 0.1%  
515 DMSO or 20µM estradiol. After 12hr, leaves were infected with actively growing culture of



516 *Pst* DC3000 (Diluted to OD 0.02) by infiltration using a needleless 1.0 ml syringe. Colony  
517 forming unit (CFU) at 0dpi (days post infection) and 2dpi was calculated.

#### 518 **Downregulation of *OsWAKL21.2* using virus-induced gene silencing (VIGS)**

519 Virus-induced gene silencing was used for Agrobacterium-mediated transient downregulation  
520 of *OsWAKL21.2* in rice. Three RNAi constructs of different length from unique 5'-end of  
521 *OsWAKL21.2* were cloned in pRTBV-MVIGS (Purkayastha et al., 2010). Downregulation was  
522 performed with a modified protocol mentioned previously (Purkayastha et al., 2010, Kant and  
523 Dasgupta, 2017). For callose deposition studies, just germinated rice seedlings (1 day old) were  
524 dipped in activated Agrobacterium culture (in 10mM MES+10mM MgCl<sub>2</sub>+200μM  
525 acetosyringone) for 24hr (Supplemental figure S3). 10 days after Agrobacterium treatment, the  
526 third leaf of each plant was infiltrated with LipA using a needleless syringe (0.5mg/ml) (at least  
527 40 leaves for each Agrobacterial strain). After 16hr, a small piece (~1.5cm) of each leaf around  
528 the zone of infiltration was collected for callose deposition while the rest of the leaf piece was  
529 stored for transcript/protein quantification. Each leaf was collected separately for callose and  
530 transcript/protein quantification and labelled. Callose deposition was observed qualitatively as  
531 mentioned above for callose deposition assay. Rest of the part of 4-5 leaves that showed either  
532 low or high callose deposition were pooled and RNA/protein was isolated from those pooled  
533 leaves for qRT-PCR or Western blotting.

534 For virulence assay after downregulation of *OsWAKL21.2*, mid-veins of 60 days old rice plants  
535 were injected with 200μl activated Agrobacterium along with either buffer or LipA (0.5mg/ml)  
536 (n>40). After 24hr, mid-veins of 10 leaves were collected (3cm each) for *OsWAKL21.2*  
537 transcript/protein quantification while remaining 20-30 leaves were infected with a freshly  
538 growing colony of *Xoo* as mentioned earlier. Lesion length caused by *Xoo* was measured after  
539 10 days of infection.

#### 540 **Purification of recombinant protein and *in vitro* biochemical assays**

541 The recombinant kinase domain of *OsWAKL21.2*, *OsWAKL21.2*<sub>376-725</sub> with 6X-His tag was  
542 cloned, expressed and purified from *E. coli* BL21-AI. 50μg of purified recombinant protein  
543 was used for kinase or guanylate cyclase assay in a 50μl reaction. The purified protein was  
544 incubated with 10μCi of [ $\gamma$ -<sup>32</sup>P] ATP in kinase assay buffer (50mM Tris (pH 7.5), 10mM  
545 MgCl<sub>2</sub>, 2mM MnCl<sub>2</sub>, 0.5mM CaCl<sub>2</sub>, 1mM DTT and 20mM ATP) for 1hr at room temperature  
546 (Li et al., 2009), run on 10% SDS-PAGE gel and gel was subsequently exposed to  
547 phosphoimager screen which was later scanned in phosphoimager (Personal molecular imager,  
548 Biorad) instrument.

549 GC assay was also performed from the same purified recombinant protein in GC assay buffer  
550 [50mM Tris (pH 7.5), 2mM MgCl<sub>2</sub>, 1mM MnCl<sub>2</sub>, 0.5mM CaCl<sub>2</sub>, 0.2mM NONOate (Sigma)]  
551 modified from the protocol described previously (Meier et al., 2010). The reaction was  
552 incubated at 37°C for either 1hr or 12hr. The 1hr reaction was used for quantitative analysis  
553 while 12hr reactions were used for qualitative analysis. cGMP produced after 1hr was  
554 quantified using cGMP enzyme immunoassay kit (Sigma-Aldrich, Cat. No- CG201) according  
555 to manufacturer's protocol and the data was analyzed using online tool 'Elisaanalysis'  
556 (<https://elisaanalysis.com/app>). For qualitative analysis, the resultant product was blotted on  
557 nitrocellulose membrane (Amersham, Cat No. RPN203E) and dried in the laminar hood with  
558 UV on for 1hr. The nucleotides were further crosslinked to the membrane by keeping in UV  
559 transilluminator for 30min. The membrane was blocked, washed and further incubated with  
560 anti cGMP antibody (1:1000, Sigma-Aldrich, Cat. No- G4899) and processed as mentioned in  
561 Western blot section.

#### 562 **RNA isolation and gene expression analysis**

563 For qRT-PCR, RNA was isolated by the protocol of Sánchez et al. (2008) with some  
564 modifications (Oñate-Sánchez and Vicente-Carbajosa, 2008, Couto et al., 2015). For rice, 10-  
565 12 leaf pieces (or mid-vein pieces) were crushed together for each treatment unless mentioned  
566 otherwise. For Arabidopsis, three leaf pieces from separate plants were crushed together for  
567 each treatment. cDNA was made from 5µg of total RNA [RNA to cDNA EcoDry™ Premix  
568 (Oligo dT), (Clontech)] according to the manufacturer's protocol. qRT-PCR was performed  
569 with diluted cDNA using Power SYBR™ Green PCR Master Mix (Thermo Fisher Scientific)  
570 in ViiA 7 Real-Time PCR System (Applied Biosystems). Relative expression was calculated  
571 in enzyme or 17-β-estradiol treated leaves with respect to mock/control (buffer or 0.1%  
572 DMSO) treated leaves. The fold change was calculated using 2<sup>-ΔΔCt</sup> method (Livak and  
573 Schmittgen, 2001). *OsActin1* and *AtActin2* were used as internal control for rice and  
574 Arabidopsis respectively. All the primers for qRT-PCR were designed using QuantPrime  
575 (Arvidsson et al., 2008).

#### 576 **Protein isolation and Western blotting**

577 For Western blot the protein was isolated from 10-12 leaf pieces of rice or three leaves of  
578 Arabidopsis using the protocol described previously with minor modifications (Rohila et al.,  
579 2006). 20µg of total protein was loaded in 10% SDS-PAGE gel for Western blot/Coomassie  
580 brilliant blue staining. The protein was transferred to PVDF membrane (Millipore) and  
581 processed for blotting. Anti OsWAKL21<sub>376-725</sub> antibodies were generated in the rabbit in our  
582 institute animal house facility and used in dilution of 1:100. HRP tagged anti-Rabbit IgG

583 secondary antibody (Abcam) (dilution 1:50000) was used and the blot was visualized in  
584 chemidoc (Vilber Lourmat).

### 585 **Localization of OsWAKL21.2**

586 The localization of OsWAKL21.2 was observed by transient transformation of onion peel cell  
587 as described previously (Sun et al., 2007). OsWAKL21.2 was cloned into Gateway compatible  
588 vector pH7FWG2 (Karimi et al., 2002) and transformed in onion peel using Agrobacterium-  
589 mediated transient transformation. The GFP signal was visualized under GFP filter in  
590 ECLIPSE Ni-E, epifluorescence microscope (Nikon, Japan).

### 591 **cGMP quantification**

592 cGMP was quantified in leaves of rosette stage transgenic Arabidopsis plants by the method  
593 used by, Dubovskaya et al. (2011), Nan et al. (2014) and Chen et al. (2018) with minor  
594 modifications (Chen et al., 2018, Dubovskaya et al., 2011, Nan et al., 2014). Six similar sized  
595 leaves (total approximate 200mg) were collected from different plants for untreated control  
596 (UT). 3-3 similar size leaves from three different plants were infiltrated either with 0.1%  
597 DMSO or 20 $\mu$ M estradiol. Two leaves from each plant (total 6 leaves, ~200mg) were collected  
598 for cGMP quantification while the third leaf was used for testing of expression of  
599 *OsWAKL21.2*. After 3hr of infiltration, leaves were collected and crushed in a fine powder  
600 using liquid nitrogen. The powder was resuspended in 2ml ice cold 6% (v/v) trichloroacetic  
601 acid (TCA) and was collected in the 5ml tube. After brief vortexing (10s), tubes were  
602 centrifuged twice at 1000g for 15min at 4°C and supernatant was collected each time in the  
603 5ml tube. The aqueous supernatant was washed 7-8 times with water-saturated diethyl ether.  
604 The solvent was evaporated in cold vacuum centrifuge at 4°C (SCANVAC, CoolSafe). cGMP  
605 was quantified in the extract using cGMP enzyme immunoassay kit (Sigma-Aldrich, Cat. No-  
606 CG201) according to the manufacturer's protocol. Data were analyzed using the online tool  
607 Elisaanalysis (<https://elisaanalysis.com/app>).

### 608 **Analyses of publicly available transcriptome data**

609 Rice microarray data performed after *Xanthomonas oryzae* treatment was obtained from GEO,  
610 NCBI (Acc. No. GSE36272). '.cel' files were downloaded, analyzed and processed using  
611 expression console (Affymetrix) using RMA based normalization. '.chp' files obtained after  
612 analysis were used in TAC software (Transcriptome analysis console v3.0, Affymetrix) for  
613 relative expression analysis. Genes that show FC  $\geq$  1.5-fold with p<0.05 were considered as  
614 differentially expressed.

### 615 **Statistical analysis**

616 All experiments were independently performed at least thrice. All data represented here  
617 indicate mean  $\pm$  SE (standard error). The results of lesion length, callose deposition and  
618 bacterial growth in CFU were analysed by one-way ANOVA ( $p < 0.05$ ) followed by the Tukey-  
619 Kramer test. The results of qRT-PCR were analyzed by Student's *t*-test and the genes that show  
620 significantly altered expression ( $p < 0.05$ ) between control and treated were considered as  
621 differentially expressed.

#### 622 **Accession numbers**

623 The PLIER16 and RMA processed microarray data files generated and used in this experiment  
624 are submitted to gene expression omnibus (GEO) (<https://www.ncbi.nlm.nih.gov/geo/>) under  
625 the accession number GSE53940. Other publicly available microarray data used in our analysis  
626 was harvested from GEO under the accession numbers GSE49242 and GSE36272. Accession  
627 numbers of genes referred in this study are provided in supplemental table 5.

628

#### 629 **Acknowledgement:**

630 We thank Mr. Ramesh P. (CSIR-CCMB) for helping in analysing the microarray data. We  
631 thank Dr. Alok K. Sinha (DBT-NIPGR), Dr. Gopaljee Jha (DBT-NIPGR) and Dr. Puran Singh  
632 Sijwali (CSIR-CCMB) for their key suggestions in experiments. We also thank Dr. Subhadeep  
633 Chatterjee (DBT-CDFD) for providing *NahG* transgenic lines and *Pseudomonas syringae*  
634 DC3000 strain.

635

636

637

#### 638 **Supplemental data:**

639 **Supplemental Table 1:** List of probe sets that show differential expression after 2hr of LipA  
640 treatment.

641 **Supplemental Table 2:** List of differentially expressed genes after 2hr and 12hr of LipA  
642 treatment.

643 **Supplemental Table 3:** Frequency of differentially expressed genes after LipA treatment in  
644 the microarray data performed after 24hr of *Xanthomonas oryzae* treatment in GEO submission  
645 GSE36272.

646 **Supplemental Table 4:** List of primers used in this study.

647 **Supplemental Table 5:** Accession numbers of the genes mentioned in this study.  
648 **Supplemental Figure S1:** Transcriptome profiling of rice leaves after treatment with LipA.  
649 **Supplemental Fig. S2:** Overexpression of *OsWAKL21.2* induces rice immune responses.  
650 **Supplemental Fig. S3:** Methodology for downregulation of *OsWAKL21.2* in rice seedlings  
651 using Virus Induced Gene Silencing (VIGS).  
652 **Supplemental Fig. S4:** Downregulation of *OsWAKL21.2*.  
653 **Supplemental Fig. S5:** VIGS mediated transient downregulation of *OsWAKL21.2* does not  
654 have significant effect on expression of predicted off-targets genes.  
655 **Supplemental Fig. S6:** qRT-PCR and Western blot validation for ectopically expressing  
656 *OsWAKL21.2* transgenic Arabidopsis plants.  
657 **Supplemental Fig. S7:** Biochemical characterization of *OsWAKL21.2*.  
658 **Supplemental Fig. S8:** Biochemical activities of purified kinase domain of mutant versions of  
659 *OsWAKL21.2*.  
660 **Supplemental Fig. S9:** qRT-PCR and Western blot validation of expression of mutant versions  
661 of *OsWAKL21.2* by transient transformation in rice and ectopic expression in Arabidopsis  
662 transgenic lines.  
663 **Supplemental Fig. S10:** Treatment with GC inhibitor attenuates *OsWAKL21.2* induced callose  
664 deposition in transgenic Arabidopsis leaves.  
665 **Supplemental Fig. S11:** Ectopic expression of *OsWAKL21.2* in Arabidopsis enhances *in*  
666 *planta* cGMP level by its GC activity.

667

668

## 669 **References:**

670

671

- 672 ALBERSHEIM, P. & ANDERSON-PROUTY, A. J. 1975. Carbohydrates, proteins, cell  
673 surfaces, and the biochemistry of pathogenesis. *Annual Review of Plant Physiology*, 26,  
674 31-52.  
675 APARNA, G., CHATTERJEE, A., JHA, G., SONTI, R. V. & SANKARANARAYANAN, R.  
676 2007. Crystallization and preliminary crystallographic studies of LipA, a secretory  
677 lipase/esterase from *Xanthomonas oryzae* pv. *oryzae*. *Acta Crystallogr Sect F Struct*  
678 *Biol Cryst Commun*, 63, 708-10.  
679 APARNA, G., CHATTERJEE, A., SONTI, R. V. & SANKARANARAYANAN, R. 2009. A  
680 cell wall-degrading esterase of *Xanthomonas oryzae* requires a unique substrate  
681 recognition module for pathogenesis on rice. *Plant Cell*, 21, 1860-73.

- 682 ARVIDSSON, S., KWASNIEWSKI, M., RIAÑO-PACHÓN, D. M. & MUELLER-ROEBER,  
683 B. 2008. QuantPrime – a flexible tool for reliable high-throughput primer design for  
684 quantitative PCR. *BMC Bioinformatics*, 9, 465.
- 685 BAI, W., CHERN, M., RUAN, D., CANLAS, P. E., SZE-TO, W. H. & RONALD, P. C. 2011.  
686 Enhanced disease resistance and hypersensitivity to BTH by introduction of an  
687 NH1/OsNPR1 paralog. *Plant Biotechnology Journal*, 9, 205-215.
- 688 BRUTUS, A., SICILIA, F., MACONE, A., CERVONE, F. & LORENZO, G. 2010. A domain  
689 swap approach reveals a role of the plant wall-associated kinase 1 (WAK1) as a receptor  
690 of oligogalacturonides. *Proc Natl Acad Sci U S A*, 107.
- 691 CHEN, X., ZUO, S., SCHWESSINGER, B., CHERN, M., CANLAS, P. E., RUAN, D., ZHOU,  
692 X., WANG, J., DAUDI, A., PETZOLD, C. J., HEAZLEWOOD, J. L. & RONALD, P.  
693 C. 2014. An XA21-associated kinase (OsSERK2) regulates immunity mediated by the  
694 XA21 and XA3 immune receptors. *Mol Plant*, 7, 874-92.
- 695 CHEN, Z., CHEN, T., SATHE, A., HE, Y., ZHANG, X.-B. & WU, J.-L. 2018. Identification  
696 of a Novel Semi-Dominant Spotted-Leaf Mutant with Enhanced Resistance to  
697 *Xanthomonas oryzae* pv. *oryzae* in Rice. *International journal of molecular sciences*,  
698 19, 3766.
- 699 CLAVERIE, J., BALACEY, S., LEMAÎTRE-GUILLIER, C., BRULÉ, D., CHILTZ, A.,  
700 GRANET, L., NOIROT, E., DAIRE, X., DARBLADE, B., HÉLOIR, M.-C. &  
701 POINSSOT, B. 2018. The Cell Wall-Derived Xyloglucan Is a New DAMP Triggering  
702 Plant Immunity in *Vitis vinifera* and *Arabidopsis thaliana*. *Frontiers in Plant Science*,  
703 9, 1725.
- 704 CLOUGH, S. J. & BENT, A. F. 1998. Floral dip: a simplified method for *Agrobacterium*-  
705 mediated transformation of *Arabidopsis thaliana*. *Plant J*, 16, 735-43.
- 706 COUTO, D., STRANSFELD, L., ARRUBARRENA, A., ZIPFEL, C. & LOZANO-DURÁN,  
707 R. 2015. Broad application of a simple and affordable protocol for isolating plant RNA.  
708 *BMC Research Notes*, 8, 154.
- 709 CURTIS, M. D. & GROSSNIKLAUS, U. 2003. A Gateway Cloning Vector Set for High-  
710 Throughput Functional Analysis of Genes in Planta. *Plant Physiology*, 133, 462-469.
- 711 DE AZEVEDO SOUZA, C., LI, S., LIN, A. Z., BOUTROT, F., GROSSMANN, G., ZIPFEL,  
712 C. & SOMERVILLE, S. 2017. Cellulose-derived oligomers act as damage-associated  
713 molecular patterns and trigger defense-like responses. *Plant Physiology*.
- 714 DELANEY, T. P., UKNES, S., VERNOOIJ, B., FRIEDRICH, L., WEYMANN, K.,  
715 NEGROTTO, D., GAFFNEY, T., GUT-RELLA, M., KESSMANN, H., WARD, E. &  
716 RYALS, J. 1994. A central role of salicylic Acid in plant disease resistance. *Science*,  
717 266, 1247-50.
- 718 DELTEIL, A., GOBBATO, E., CAYROL, B., ESTEVAN, J., MICHEL-ROMITI, C.,  
719 DIEVART, A., KROJ, T. & MOREL, J.-B. 2016. Several wall-associated kinases  
720 participate positively and negatively in basal defense against rice blast fungus. *BMC*  
721 *Plant Biology*, 16, 17.
- 722 DONG, X., HONG, Z., CHATTERJEE, J., KIM, S. & VERMA, D. P. S. 2008. Expression of  
723 callose synthase genes and its connection with Npr1 signaling pathway during pathogen  
724 infection. *Planta*, 229, 87-98.
- 725 DUBOVSKAYA, L. V., BAKAKINA, Y. S., KOLESNEVA, E. V., SODEL, D. L.,  
726 MCAINSH, M. R., HETHERINGTON, A. M. & VOLOTOVSKI, I. D. 2011. cGMP-  
727 dependent ABA-induced stomatal closure in the ABA-insensitive *Arabidopsis* mutant  
728 *abi1-1*. *New Phytol*, 191, 57-69.
- 729 GALLETI, R., DENOUEX, C., GAMBETTA, S., DEWDNEY, J., AUSUBEL, F. M., DE  
730 LORENZO, G. & FERRARI, S. 2008. The AtrbohD-Mediated Oxidative Burst Elicited  
731 by Oligogalacturonides in *Arabidopsis* Is Dispensable for the Activation of Defense

- 732 Responses Effective against *Botrytis cinerea*. *Plant Physiology*, 148, 1695-  
733 1706.
- 734 GEHRING, C. & TUREK, I. S. 2017. Cyclic nucleotide monophosphates and their cyclases in  
735 plant signaling. *Frontiers in plant science*, 8, 1704.
- 736 GUST, A. A., PRUITT, R. & NÜRNBERGER, T. 2017. Sensing Danger: Key to Activating  
737 Plant Immunity. *Trends in plant science*, 22, 779-791.
- 738 HAHN, M. G., DARVILL, A. G. & ALBERSHEIM, P. 1981. Host-Pathogen Interactions :  
739 XIX. THE ENDOGENOUS ELICITOR, A FRAGMENT OF A PLANT CELL WALL  
740 POLYSACCHARIDE THAT ELICITS PHYTOALEXIN ACCUMULATION IN  
741 SOYBEANS. *Plant Physiol*, 68, 1161-9.
- 742 HARKENRIDER, M., SHARMA, R., DE VLEESSCHAUWER, D., TSAO, L., ZHANG, X.,  
743 CHERN, M., CANLAS, P., ZUO, S. & RONALD, P. C. 2016. Overexpression of Rice  
744 Wall-Associated Kinase 25 (OsWAK25) Alters Resistance to Bacterial and Fungal  
745 Pathogens. *PLoS ONE*, 11, e0147310.
- 746 HE, Z. H., CHEESEMAN, I., HE, D. & KOHORN, B. D. 1999. A cluster of five cell wall-  
747 associated receptor kinase genes, Wak1-5, are expressed in specific organs of  
748 Arabidopsis. *Plant Mol Biol*, 39, 1189-96.
- 749 HE, Z. H., HE, D. & KOHORN, B. D. 1998. Requirement for the induced expression of a cell  
750 wall associated receptor kinase for survival during the pathogen response. *Plant J*, 14,  
751 55-63.
- 752 HÉMATY, K., CHERK, C. & SOMERVILLE, S. 2009. Host-pathogen warfare at the plant  
753 cell wall. *Current Opinion in Plant Biology*, 12, 406-413.
- 754 HU, K., CAO, J., ZHANG, J., XIA, F., KE, Y., ZHANG, H., XIE, W., LIU, H., CUI, Y., CAO,  
755 Y., SUN, X., XIAO, J., LI, X., ZHANG, Q. & WANG, S. 2017. Improvement of  
756 multiple agronomic traits by a disease resistance gene via cell wall reinforcement. 3,  
757 17009.
- 758 HURNI, S., SCHEUERMANN, D., KRATTINGER, S. G., KESSEL, B., WICKER, T.,  
759 HERREN, G., FITZE, M. N., BREEN, J., PRESTERL, T. & OUZUNOVA, M. 2015.  
760 The maize disease resistance gene Htn1 against northern corn leaf blight encodes a  
761 wall-associated receptor-like kinase. *Proceedings of the National Academy of Sciences*,  
762 112, 8780-8785.
- 763 IGARASHI, D., TSUDA, K. & KATAGIRI, F. 2012. The peptide growth factor,  
764 phytosulfokine, attenuates pattern-triggered immunity. *Plant J*, 71, 194-204.
- 765 JACOBS, A. K., LIPKA, V., BURTON, R. A., PANSTRUGA, R., STRIZHOV, N.,  
766 SCHULZE-LEFERT, P. & FINCHER, G. B. 2003. An Arabidopsis Callose Synthase,  
767 GSL5, Is Required for Wound and Papillary Callose Formation. *Plant Cell*, 15, 2503-  
768 13.
- 769 JANDA, M. & RUELLAND, E. 2015. Magical mystery tour: salicylic acid signalling.  
770 *Environmental and Experimental Botany*, 114, 117-128.
- 771 JHA, G., PATEL, H. K., DASGUPTA, M., PALAPARTHI, R. & SONTI, R. V. 2010.  
772 Transcriptional Profiling of Rice Leaves Undergoing a Hypersensitive Response Like  
773 Reaction Induced by *Xanthomonas oryzae* pv. *oryzae* Cellulase. *Rice*, 3, 1-21.
- 774 JHA, G., RAJESHWARI, R. & SONTI, R. V. 2005. Bacterial Type Two Secretion System  
775 Secreted Proteins: Double-Edged Swords for Plant Pathogens. *Molecular Plant-  
776 Microbe Interactions*, 18, 891-898.
- 777 JHA, G., RAJESHWARI, R. & SONTI, R. V. 2007. Functional interplay between two  
778 *Xanthomonas oryzae* pv. *oryzae* secretion systems in modulating virulence on rice.  
779 *Molecular Plant-Microbe Interactions*, 20, 31-40.
- 780 KANT, R. & DASGUPTA, I. 2017. Phenotyping of VIGS-mediated gene silencing in rice  
781 using a vector derived from a DNA virus. *Plant cell reports*, 36, 1159-1170.

- 782 KARIMI, M., INZE, D. & DEPICKER, A. 2002. GATEWAY vectors for Agrobacterium-  
783 mediated plant transformation. *Trends Plant Sci*, 7, 193-5.
- 784 KOHORN, B. D. 2015. Cell wall-associated kinases and pectin perception. *Journal of*  
785 *experimental botany*, 67, 489-494.
- 786 KOHORN, B. D., JOHANSEN, S., SHISHIDO, A., TODOROVA, T., MARTINEZ, R.,  
787 DEFEO, E. & OBREGON, P. 2009. Pectin activation of MAP kinase and gene  
788 expression is WAK2 dependent. *Plant J*, 60, 974-82.
- 789 KOHORN, B. D., KOBAYASHI, M., JOHANSEN, S., FRIEDMAN, H. P., FISCHER, A. &  
790 BYERS, N. 2006. Wall-associated kinase 1 (WAK1) is crosslinked in endomembranes,  
791 and transport to the cell surface requires correct cell-wall synthesis. *Journal of cell*  
792 *science*, 119, 2282-2290.
- 793 LI, H., ZHOU, S. Y., ZHAO, W. S., SU, S. C. & PENG, Y. L. 2009. A novel wall-associated  
794 receptor-like protein kinase gene, OsWAK1, plays important roles in rice blast disease  
795 resistance. *Plant Mol Biol*, 69.
- 796 LIVAK, K. J. & SCHMITTGEN, T. D. 2001. Analysis of relative gene expression data using  
797 real-time quantitative PCR and the 2(-Delta Delta C(T)) Method. *Methods*, 25, 402-8.
- 798 LOZANO-DURÁN, R. & ZIPFEL, C. 2015. Trade-off between growth and immunity: role of  
799 brassinosteroids. *Trends in plant science*, 20, 12-19.
- 800 MA, Y., WALKER, R. K., ZHAO, Y. & BERKOWITZ, G. A. 2012. Linking ligand perception  
801 by PEPR pattern recognition receptors to cytosolic Ca<sup>2+</sup> elevation and downstream  
802 immune signaling in plants. *Proc Natl Acad Sci U S A*, 109, 19852-7.
- 803 MACHO, A. P. & ZIPFEL, C. 2014. Plant PRRs and the activation of innate immune signaling.  
804 *Mol Cell*, 54, 263-72.
- 805 MEIER, S., RUZVIDZO, O., MORSE, M., DONALDSON, L., KWEZI, L. & GEHRING, C.  
806 2010. The Arabidopsis Wall Associated Kinase-Like 10 Gene Encodes a Functional  
807 Guanylyl Cyclase and Is Co-Expressed with Pathogen Defense Related Genes. *PLoS*  
808 *ONE*, 5, e8904.
- 809 MENG, X. & ZHANG, S. 2013. MAPK cascades in plant disease resistance signaling. *Annu*  
810 *Rev Phytopathol*, 51, 245-66.
- 811 MILLET, Y. A., DANNA, C. H., CLAY, N. K., SONGNUAN, W., SIMON, M. D., WERCK-  
812 REICHHART, D. & AUSUBEL, F. M. 2010. Innate immune responses activated in  
813 Arabidopsis roots by microbe-associated molecular patterns. *Plant Cell*, 22, 973-90.
- 814 NAN, W., WANG, X., YANG, L., HU, Y., WEI, Y., LIANG, X., MAO, L. & BI, Y. 2014.  
815 Cyclic GMP is involved in auxin signalling during Arabidopsis root growth and  
816 development. *J Exp Bot*, 65, 1571-83.
- 817 OÑATE-SÁNCHEZ, L. & VICENTE-CARBAJOSA, J. 2008. DNA-free RNA isolation  
818 protocols for Arabidopsis thaliana, including seeds and siliques. *BMC Research Notes*,  
819 1, 93.
- 820 PARK, C. J., PENG, Y., CHEN, X., DARDICK, C., RUAN, D., BART, R., CANLAS, P. E.  
821 & RONALD, P. C. 2008. Rice XB15, a protein phosphatase 2C, negatively regulates  
822 cell death and XA21-mediated innate immunity. *PLoS Biol*, 6, e231.
- 823 PILLAI, S. E., KUMAR, C., PATEL, H. K. & SONTI, R. V. 2018. Overexpression of a cell  
824 wall damage induced transcription factor, OsWRKY42, leads to enhanced callose  
825 deposition and tolerance to salt stress but does not enhance tolerance to bacterial  
826 infection. *BMC Plant Biology*, 18, 177.
- 827 PURKAYASTHA, A., MATHUR, S., VERMA, V., SHARMA, S. & DASGUPTA, I. 2010.  
828 Virus-induced gene silencing in rice using a vector derived from a DNA virus. *Planta*,  
829 232, 1531-1540.



- 830 RAJESHWARI, R., JHA, G. & SONTI, R. V. 2005. Role of an In Planta-Expressed Xylanase  
831 of *Xanthomonas oryzae* pv. *oryzae* in Promoting Virulence on Rice. *Molecular Plant-  
832 Microbe Interactions*, 18, 830-837.
- 833 RANJAN, A., VADASSERY, J., PATEL, H. K., PANDEY, A., PALAPARTHI, R.,  
834 MITHOFER, A. & SONTI, R. V. 2015. Upregulation of jasmonate biosynthesis and  
835 jasmonate-responsive genes in rice leaves in response to a bacterial pathogen mimic.  
836 *Funct Integr Genomics*, 15, 363-73.
- 837 ROHILA, J. S., CHEN, M., CHEN, S., CHEN, J., CERNY, R., DARDICK, C., CANLAS, P.,  
838 XU, X., GRIBSKOV, M., KANRAR, S., ZHU, J. K., RONALD, P. & FROMM, M. E.  
839 2006. Protein-protein interactions of tandem affinity purification-tagged protein  
840 kinases in rice. *Plant J*, 46, 1-13.
- 841 SAINTENAC, C., LEE, W.-S., CAMBON, F., RUDD, J. J., KING, R. C., MARANDE, W.,  
842 POWERS, S. J., BERGES, H., PHILLIPS, A. L. & UAUY, C. 2018. Wheat receptor-  
843 kinase-like protein Stb6 controls gene-for-gene resistance to fungal pathogen  
844 *Zymoseptoria tritici*. *Nature genetics*, 50, 368.
- 845 SUN, W., CAO, Z., LI, Y., ZHAO, Y. & ZHANG, H. 2007. A simple and effective method for  
846 protein subcellular localization using Agrobacterium-mediated transformation of onion  
847 epidermal cells. *Biologia*, 62, 529-532.
- 848 SWIEZAWSKA, B., JAWORSKI, K., DUSZYN, M., PAWELEK, A. & SZMIDT-  
849 JAWORSKA, A. 2017. The *Hippeastrum hybridum* PepR1 gene (HpPepR1) encodes a  
850 functional guanylyl cyclase and is involved in early response to fungal infection. *J Plant  
851 Physiol*, 216, 100-107.
- 852 SWIEZAWSKA, B., JAWORSKI, K., SZEWCZUK, P., PAWELEK, A. & SZMIDT-  
853 JAWORSKA, A. 2015. Identification of a *Hippeastrum hybridum* guanylyl cyclase  
854 responsive to wounding and pathogen infection. *J Plant Physiol*, 189, 77-86.
- 855 VERICA, J. A. & HE, Z. 2002. The Cell Wall-Associated Kinase (WAK) and WAK-Like  
856 Kinase Gene Family. *Plant Physiology*, 129, 455-459.
- 857 WANG, L., EINIG, E., ALMEIDA-TRAPP, M., ALBERT, M., FLIEGMANN, J.,  
858 MITHÖFER, A., KALBACHER, H. & FELIX, G. 2018. The systemin receptor SYR1  
859 enhances resistance of tomato against herbivorous insects. *Nature Plants*, 4, 152-156.
- 860 WONG, A., GEHRING, C. & IRVING, H. R. 2015. Conserved Functional Motifs and  
861 Homology Modeling to Predict Hidden Moonlighting Functional Sites. *Frontiers in  
862 Bioengineering and Biotechnology*, 3, 82.
- 863 XIN, X. F. & HE, S. Y. 2013. *Pseudomonas syringae* pv. *tomato* DC3000: a model pathogen  
864 for probing disease susceptibility and hormone signaling in plants. *Annu Rev  
865 Phytopathol*, 51, 473-98.
- 866 XU, N., FU, D., LI, S., WANG, Y. & WONG, A. 2018. GCPred: a web tool for guanylyl  
867 cyclase functional centre prediction from amino acid sequence. *Bioinformatics*, 34,  
868 2134-2135.
- 869 ZHANG, N., ZHANG, B., ZUO, W., XING, Y., KONLASUK, S., TAN, G., ZHANG, Q., YE,  
870 J. & XU, M. 2017. Cytological and Molecular Characterization of ZmWAK-Mediated  
871 Head-Smut Resistance in Maize. *Mol Plant Microbe Interact*, 30, 455-465.
- 872 ZHENG, L., BAUMANN, U. & REYMOND, J.-L. 2004. An efficient one-step site-directed  
873 and site-saturation mutagenesis protocol. *Nucleic Acids Research*, 32, e115-e115.
- 874 ZUO, W., CHAO, Q., ZHANG, N., YE, J., TAN, G., LI, B., XING, Y., ZHANG, B., LIU, H.,  
875 FENGLER, K. A., ZHAO, J., ZHAO, X., CHEN, Y., LAI, J., YAN, J. & XU, M. 2015.  
876 A maize wall-associated kinase confers quantitative resistance to head smut. *Nat Genet*,  
877 47, 151-7.

879 **Figure 1: Expression of *OsWAKL21.2* is enhanced after treatment of rice leaves either**  
880 **with LipA or *Xoo*.**

881 (A) Venn diagram indicating number of genes that are differentially expressed after 2hr and  
882 12hr of LipA treatment.

883 (B) Three splice variants of *OsWAKL21* as shown in Rice-MSU database.

884 (C) qRT-PCR analysis of the expression of all three splice variants of *OsWAKL21* after 2hr  
885 and 12hr of LipA treatment, and after 24hr of *Xoo* treatment in rice leaves. Relative expression  
886 was calculated in leaves treated with LipA or *Xoo* with respect to leaves treated with buffer.  
887 Asterisk (\*) represents significant difference in fold change with  $p < 0.05$ .

888 (D) qRT-PCR analysis of expression of *OsWAKL21.2* in rice leaves after 24hr of treatment  
889 with either *Xoo*, LipA mutant of *Xoo* (*Xoo* LipA-) or LipA complementing clone of *Xoo* (*Xoo*  
890 LipA-CC). a and b above the bars indicate significant difference with  $p < 0.05$ .

891 In C and D, 12-14 days old leaves were infiltrated with either LipA (0.5mg/ml) or *Xoo* (O.D.  
892 1.0). Each bar represents average value and error bar denotes standard error (SE) of at least  
893 three different experiments. *OsActin1* was used as internal control for qRT-PCR. The relative  
894 fold change was calculated by using  $2^{-\Delta\Delta Ct}$  method.

895

896 **Figure 2: Overexpression of *OsWAKL21.2* in rice leaves enhances plant immune**  
897 **responses.**

898 (A) Callose deposition in rice leaves after treatment with various *Agrobacterium* constructs or  
899 controls. The image shown is representative image of one viewing area for each category. Scale  
900 bar represents 100 $\mu$ m. The numbers denotes: 1-0.1% DMSO, 2-20 $\mu$ M  $\beta$ -estradiol (Est), 3,4-  
901 *Agrobacterium* containing pMDC7 (Empty vector-EV) without (3) or with (4) inducer (Est),  
902 5,6- *Agrobacterium* containing pMDC7::*OsWAKL21.2* without (5) or with (6) inducer (Est),  
903 7-LipA.

904 (B) Quantification of callose deposition in rice leaves after treatment with various  
905 *Agrobacterium* constructs or controls. Bar diagram showing the quantification of number of  
906 callose deposits per area in rice leaves. Number of callose deposits in 8 such viewing areas (as  
907 shown in A) per leaf were considered. Each bar represents the average and error bar represents  
908 SE of 10-15 leaves per treatment in one set of experiment. Similar results were obtained in  
909 three independent experiments.

910 (C) Lesion length caused by *Xoo* in rice leaves when mid-vein of the leaves were previously  
911 treated with various *Agrobacterium* constructs or controls. Mid-veins of rice leaves of 60 day  
912 old plants were injected with either MQ, *Agrobacterium* carrying empty vector or  
913 *OsWAKL21.2* and also with (20 $\mu$ M  $\beta$ -estradiol) or without (0.1% DMSO) inducer. After 24hr,  
914 the leaves were pin prick inoculated with *Xoo*, 1cm above the point of *Agrobacterium* injection.  
915 Lesion length was measured after 10 days of infection (supplemental figure 1C). Each bar  
916 indicates average and error bar represents SE of >20 leaf per treatment in one set of experiment.  
917 Similar results were obtained in three independent experiments.

918 (D) Relative expression of key defence related genes after transient overexpression of  
919 *OsWAKL21.2* in rice leaves. Each bar represents average fold change and the error bars indicate  
920 SE in three independent experiments (n=12 in each experiment). For each gene, transcript level  
921 of uninduced condition (treatment with *Agrobacterium* carrying *OsWAKL21.2* with 0.1%  
922 DMSO) was considered as 1 and was compared to induced condition (treatment with  
923 *Agrobacterium* carrying *OsWAKL21.2* with 20 $\mu$ M estradiol). *OsActin1* was used as internal

924 control for qRT-PCR. The relative fold change was calculated by using  $2^{-\Delta\Delta C_t}$  method.  
925 In A and B, 12-14 days old rice leaves were infiltrated with either MQ, Agrobacterium carrying  
926 empty vector or vector containing *OsWAKL21.2* and also with (20 $\mu$ M  $\beta$ -estradiol) or without  
927 (0.1% DMSO) inducer. In B and C, asterisk (\*) represents significant difference with  $p < 0.05$ .  
928 MQ (MilliQ or water) treatment indicate control without any Agrobacterium treatment. In A,  
929 B and C, Leaves treated with LipA were used as positive control.

930

931

932 **Figure 3: Downregulation of *OsWAKL21.2* attenuates LipA induced immune responses**  
933 **in rice.**

934 (A) Categorization of number of callose deposits in three different groups: low, medium and  
935 high. The image shown is representative image of one viewing area for each group. 8 such  
936 areas per leaf were viewed for categorization.

937 (B) Fraction of leaves showing low, medium or high callose deposition after LipA treatment.

938 (C) Fraction of leaves showing callose deposits post LipA infiltration that were previously  
939 treated with either MQ (mock treatment), Agrobacterium containing VIGS-EV or WAK-RNAi  
940 constructs [WAKL-RNAi 1-300 (WRi 1-300), WAKL-RNAi 451-600 (WRi 451-600) or  
941 WAKL-RNAi 1-600 (WRi 1-600)] in 12-14 days old rice leaves.

942 (D) qRT-PCR analysis of *OsWAKL21.2* transcript levels in leaves showing either low or high  
943 callose deposits (H: High callose, L: Low callose). Each bar represents average fold change  
944 and error bar indicates SE observed in three biological replicates. For each sample, 4-5 leaves  
945 showing respective callose phenotype were used for RNA isolation. Transcript level in mock  
946 (MQ) treated leaves was considered as 1 and fold change in Agrobacterium treated leaves was  
947 calculated with respect to it.

948 (E) Lesion length caused by *Xoo* in mid-veins of 60 days old rice leaves that were pre-treated  
949 with either buffer and LipA alone or along with Agrobacterium strains [WAKL-RNAi 1-300  
950 (WRi 1-300) or WALK-RNAi 1-600 (WRi 1-600)]. Each bar represents average lesion length  
951 and error bar show SE of at least 20 leaves in one experiment. Similar results were obtained in  
952 three independent experiments.

953 (F) Expression level of *OsWAKL21.2* in rice leaves after 24hr of injection with either buffer  
954 and LipA alone or along with Agrobacterium strains [WAKL-RNAi 1-300 (WRi 1-300) or  
955 WAKL-RNAi 1-600 (WRi 1-600)]. Each bar represents average of three independent  
956 experiments,  $n > 10$  in each experiment. Transcript level of buffer injected leaves was  
957 considered as 1 and fold change in Agrobacterium with Buffer/LipA treated leaves was  
958 calculated with respect to it.

959 In B, C, D and F, each bar represents the average and error bar denotes the SE of three different  
960 biological replicates. Each sample denotes the ratio of leaves showing respective phenotype in  
961 at least 40 leaves. In C, D, E and F small letters (a, b and c) above the bars indicates significant  
962 difference with  $p < 0.05$ . In D and F, *OsActin1* was used as internal control for qRT-PCR and  
963 the relative fold change was calculated by using  $2^{-\Delta\Delta C_t}$  method.

964

965

966 **Figure 4: Ectopic expression of *OsWAKL21.2* in Arabidopsis induces immune responses.**

967 (A) Callose deposition in leaves of wild type (Col-0) or *OsWAKL21.2* transgenic Arabidopsis  
968 lines following with 20 $\mu$ M  $\beta$ -estradiol (inducer) or 0.1% DMSO (control). Numbers denotes:  
969 1,2- Col-0 treated with DMSO (1) or Est (2), 3,4- *OsWAKL21.2* transgenic line 7 treated with  
970 DMSO (3) or Est (4), 5,6- *OsWAKL21.2* transgenic line 14 treated with DMSO (5) or Est (6).

971 (B) Quantification of number of callose deposits in wild type Columbia (Col-0) and two  
972 different Arabidopsis *OsWAKL21.2* transgenic lines after treatment with control or inducer.  
973 Leaves were treated with either 20 $\mu$ M  $\beta$ -estradiol (inducer) or 0.1% DMSO (control). Each bar  
974 represents the average and error bar represents SE of three different leaves for each treatment  
975 in an experiment.

976 (C) Effect of ectopic expression of *OsWAKL21.2* on growth of *Pst* DC3000 after subsequent  
977 infection. Leaves were treated with either 20 $\mu$ M  $\beta$ -estradiol (inducer) or 0.1% DMSO (control),  
978 12hr before *Pst* infection. Each bar represents average and error bar represents SE of five leaves  
979 for each treatment in an experiment.

980 (D) Effect of ectopic expression of *OsWAKL21.2* in transgenic Arabidopsis lines on the  
981 expression of SA or JA pathway responsive genes. Expression in 0.1% DMSO treated leaves  
982 was considered as 1 and relative expression in 20 $\mu$ M estradiol treated leaves was calculated  
983 with respect to it. Each bar represents the average of three independent experiments for each  
984 line. For each sample, RNA was isolated from 3 leaves for every treatment. *AtActin2* was used  
985 as internal control for qRT-PCR. The relative fold change was calculated by using  $2^{-\Delta\Delta Ct}$   
986 method

987

988 Transgenic or wild type plant leaves were treated with 0.1% DMSO (Control) or 20 $\mu$ M  
989 estradiol (inducer). 12hr later leaves were either collected for callose deposition or  
990 transcript/protein analysis or were infected with *Pst* DC3000. Similar results were obtained in  
991 three independent experiments for A, B and C. Asterisk (\*) represents significant difference  
992 with  $p < 0.05$ .

993

994

995 **Figure 5: Biochemical characterization and localization of *OsWAKL21.2***

996 (A) Domain architecture of *OsWAKL21.2* using SMART tool ([http://smart.embl-  
997 heidelberg.de/](http://smart.embl-heidelberg.de/)) (SP: signal peptide, GUB: galacturonan binding domain, EGF: epidermal  
998 growth factor like repeat, TM: transmembrane region, STYKc: serine threonine kinase domain,  
999 GC: guanylate cyclase motif).

1000 (B) *OsWAKL21.2*-EGFP localize on the cell membrane in onion peel after transient  
1001 expression. *OsWAKL21.2*-EGFP was transiently transformed to onion peel cells using  
1002 Agrobacterium and peels were visualized after 2 days under epifluorescence microscope. The  
1003 experiment was repeated three times and similar results were obtained.

1004 (C) Kinase assay: Kinase domain of *OsWAKL21* cloned and purified from *E. coli* show  
1005 autophosphorylation activity. 50 $\mu$ g of affinity purified recombinant protein was used for assay  
1006 with or without radiolabelled ATP. After 1hr, denatured sample was loaded on 10% SDS-  
1007 PAGE gel. The gel was further subjected to autoradiography and CBB staining. The experiment  
1008 was repeated three times and similar results were obtained.

1009 (D) Guanylate cyclase assay: 50 $\mu$ g (in 50  $\mu$ l) of affinity purified recombinant protein was used

1010 for GC assay with or without GTP. After 1hr, 5  $\mu$ l of the sample was directly used for cGMP  
1011 quantification. Only GTP and GC buffer + GTP were used as controls. Each bar indicate  
1012 average and error bar represents SE of three independent experiments. Small letters (a and b)  
1013 above the bars indicate significant difference with  $p < 0.05$ .

1014

1015

1016

1017 **Figure 6: Kinase activity of OsWAKL21.2 is required for induction of immune responses**  
1018 **in rice but not in Arabidopsis.**

1019 (A) Quantification of callose deposition after transient overexpression of either wild type  
1020 *OsWAKL21.2* (WAK-wt) or kinase deficient mutant of *OsWAKL21.2* (*OsWAKL21.2*-kd or  
1021 WAK-kd) in rice leaves. Each bar represents average and error bar represents SE of at least 12  
1022 leaves per treatment in an experiment

1023 (B) Lesion lengths after 10 days of *Xoo* pin prick inoculation when *OsWAKL21.2* or  
1024 *OsWAKL21.2*-kd was transiently overexpressed prior to infection by *Xoo*. Each bar represents  
1025 average and error bar represents SE of lesion length in 20-30 leaves in an experiment.

1026 (C) Relative expression of key defence related genes after transient overexpression of either  
1027 *OsWAKL21.2* or *OsWAKL21.2*-kd in rice leaves. For each gene, transcript level of uninduced  
1028 condition (treatment with Agrobacterium carrying WAK-wt or WAK-kd with 0.1% DMSO)  
1029 was considered as 1 and was compared to induced condition (treatment with Agrobacterium  
1030 carrying WAK-wt or WAK-kd with 20 $\mu$ M estradiol). Each bar represents average fold change  
1031 and error bars indicate SE in three independent experiments (n=12 in each experiment).

1032 (D) Quantification of callose deposition in leaves of four different *OsWAKL21.2*-kd  
1033 Arabidopsis transgenic lines (lines 1, 4, 11 and 12) treated with either 20 $\mu$ M  $\beta$ -estradiol  
1034 (inducer) or 0.1% DMSO (control).. Each bar represents average and error bar represents SE  
1035 of three leaves in an experiment.

1036 (E) Effect of ectopic expression of *OsWAKL21.2*-kd on growth of *Pst* DC3000 after subsequent  
1037 infection. Leaves of wild type *OsWAKL21.2* (WAK-wt) and two different *OsWAKL21.2*-kd  
1038 Arabidopsis transgenic lines (lines 1 and 11) were infiltrated with either 20 $\mu$ M  $\beta$ -estradiol  
1039 (inducer) or 0.1% DMSO (control) and were subsequently inoculated with *Pst* DC3000, 12hr  
1040 post infiltration. Each bar represents average and error bar represents SE of five leaves in each  
1041 sample.

1042 (F) Effect of ectopic expression of *OsWAKL21.2*-kd on expression of key defence related  
1043 *OsWAKL21.2* induced genes in transgenic Arabidopsis lines. Expression in 0.1% DMSO  
1044 treated leaves was considered as 1 and relative expression in 20 $\mu$ M estradiol treated leaves was  
1045 calculated with respect to it. Each bar represents average fold change and error bars indicate  
1046 SE in three independent experiments (n=3 in each experiment).

1047 In C and F, *OsActin1* and *AtActin2* were used respectively as internal control for qRT-PCR.  
1048 The relative fold change was calculated by using  $2^{-\Delta\Delta Ct}$  method. Similar results were obtained  
1049 in three different experiments in A, B, D and E. Asterisk (\*) represents significant difference  
1050 with  $p < 0.05$ .

1051

1052 **Figure 7: Guanylate cyclase activity of OsWAKL21.2 is required for induction of immune**  
1053 **responses in Arabidopsis but not in rice.**

1054 (A) Quantification of callose deposition in leaves of two different Arabidopsis transgenic lines  
1055 (lines 3 and 6) expressing GC deficient *OsWAKL21.2* (*OsWAKL21.2*-gcd or WAK-gcd) were  
1056 treated with either 20µM β-estradiol (inducer) or 0.1% DMSO (control). Each bar represents  
1057 average and error bar represents SE of three leaves in an experiment.

1058 (B) Effect of ectopic expression of *OsWAKL21.2*-gcd on growth of *Pst* DC3000 after  
1059 subsequent infection. Leaves of wild type *OsWAKL21.2* (WAK-wt) and two different  
1060 *OsWAKL21.2*-gcd Arabidopsis transgenic lines (lines 3 and 6) were infiltrated with either  
1061 20µM β-estradiol (inducer) or 0.1% DMSO (control) and were subsequently inoculated with  
1062 *Pst* DC3000, 12hr post infiltration. Each bar represents average and error bar represents SE of  
1063 five leaves in each sample.

1064 (C) Effect of ectopic expression of *OsWAKL21.2*-gcd on expression of key defence related  
1065 *OsWAKL21.2* induced genes in transgenic Arabidopsis lines. Expression in 0.1% DMSO  
1066 treated leaves was considered as 1 and relative expression in 20µM estradiol treated leaves was  
1067 calculated with respect to it. Each bar represents average fold change and error bars indicate  
1068 SE in three independent experiments (n=3 in each experiment).

1069 (D) Quantification of callose deposition after transient overexpression of either wild type  
1070 (WAK-wt) or WAK-gcd in rice leaves. Each bar represents average and error bar represents  
1071 SE of at least 12 leaves per treatment in an experiment.

1072 (E) Lesion lengths after 10 days of *Xoo* pin prick inoculation when *OsWAKL21.2* or  
1073 *OsWAKL21.2*-gcd was transiently overexpressed prior to infection by *Xoo*. Each bar represents  
1074 average and error bar represents SE of lesion length in 20-30 leaves in an experiment.

1075 (F) Relative expression of key defence related genes after transient overexpression of either  
1076 *OsWAKL21.2* or *OsWAKL21.2*-gcd in rice leaves. For each gene, transcript level of uninduced  
1077 condition (treatment with Agrobacterium carrying WAK-wt or WAK-gcd with 0.1% DMSO)  
1078 was considered as 1 and was compared to induced condition (treatment with Agrobacterium  
1079 carrying WAK-wt or WAK-gcd with 20µM estradiol). Each bar represents average fold change  
1080 and error bars indicate SE in three independent experiments (n=12 in each experiment).

1081

1082 In C and F, *AtActin2* and *OsActin1* were used respectively as internal control for qRT-PCR.  
1083 The relative fold change was calculated by using  $2^{-\Delta\Delta Ct}$  method. Similar results were obtained  
1084 in three different experiments in A, B, D and E. Asterisk (\*) represents significant difference  
1085 with  $p < 0.05$ .

1086

1087 **Figure 8: *OsWAKL21.2* induces JA pathway in rice while activates SA pathway in**  
1088 **Arabidopsis.**

1089 (A) Relative expression of ten JA pathway related genes after transient overexpression of  
1090 *OsWAKL21.2* in rice leaves. These genes include three ZIM domain-containing proteins  
1091 (LOC\_Os03g08310, LOC\_Os03g08330 and LOC\_Os10g25230), two lipoxygenases  
1092 (LOC\_Os08g39840 and LOC\_Os08g39850), one allene oxide synthase (AOS,  
1093 LOC\_Os03g55800), one basic helix loop helix transcription factor (RERJ1,  
1094 LOC\_Os04g23550), one ethylene-responsive transcription factor (ERF, LOC\_Os02g43790),  
1095 one chitinase (PR3, LOC\_Os06g51050) and an AP2 domain-containing transcription factor  
1096 (LOC\_Os08g36920). For each gene, transcript level of uninduced condition (treatment with  
1097 Agrobacterium carrying WAK-wt with 0.1% DMSO) was considered as 1 and was compared  
1098 to induced condition (treatment with Agrobacterium carrying WAK-wt with 20µM estradiol).

1099 Each bar represents average fold change and error bars indicate SE in three independent  
1100 experiments (n=12 in each experiment). *OsActin1* was used as internal control.

1101 (B) Effect of ectopic expression of *OsWAKL21.2* on expression of SA pathway related genes  
1102 in transgenic Arabidopsis lines. Expression in 0.1% DMSO treated leaves was considered as 1  
1103 and relative expression in 20 $\mu$ M estradiol treated leaves was calculated with respect to it. Each  
1104 bar represents average fold change and error bars indicate SE in three independent experiments  
1105 (n=3 in each experiment). *AtActin2* was used as internal control for qRT-PCR.

1106 (C) Quantification of callose deposits in Arabidopsis crossing lines expressing *NahG* and  
1107 *OsWAKL21.2* (line 2 and 3) or either one of those (*NahG*: line 12, WAK-wt: line 8). Leaves  
1108 were treated with either 20 $\mu$ M  $\beta$ -estradiol (inducer) or 0.1% DMSO (control). Each bar  
1109 represents average and error bar represents SE of three leaves in an experiment.

1110 (D) Modal depicting mechanistic role of *OsWAKL21.2* in induction of immune responses in  
1111 rice and Arabidopsis. *OsWAKL21.2* likely perceive cell wall damage caused after LipA  
1112 treatment in rice. Upon overexpression in rice, *OsWAKL21.2* induces rice immune responses  
1113 via its kinsase activity. Upon ectopic expression in Arabidopsis transgenic lines, *OsWAKL21.2*  
1114 induce Arabidopsis immune responses by its guanylate cyclase activity.

1115 Asterisk (\*) represents significant difference with  $p < 0.05$ . In A and B the relative fold change  
1116 was calculated by using  $2^{-\Delta\Delta Ct}$  method.

1117

1118

1119

1120

1121

1122

1123

1124

1125

1126

1127

1128

1129

1130

1131

1132

1133

1134

A

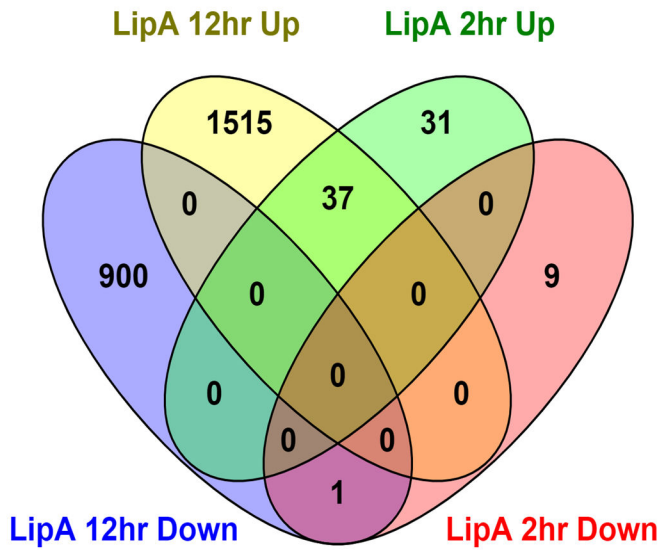

B

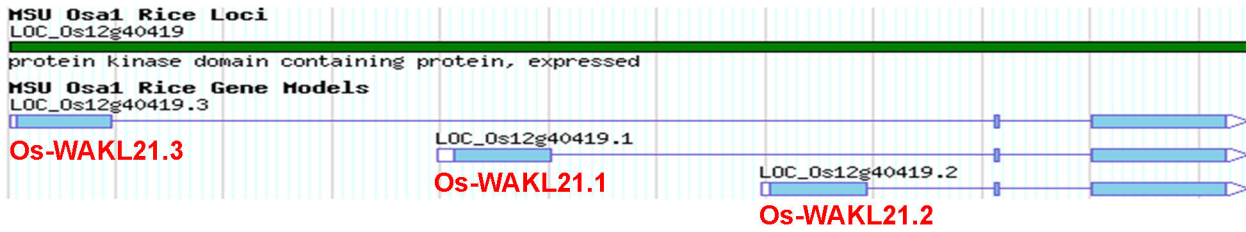

C

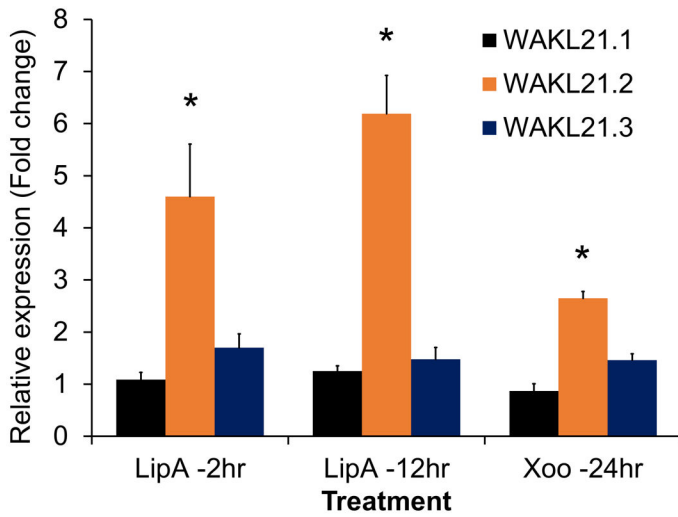

D

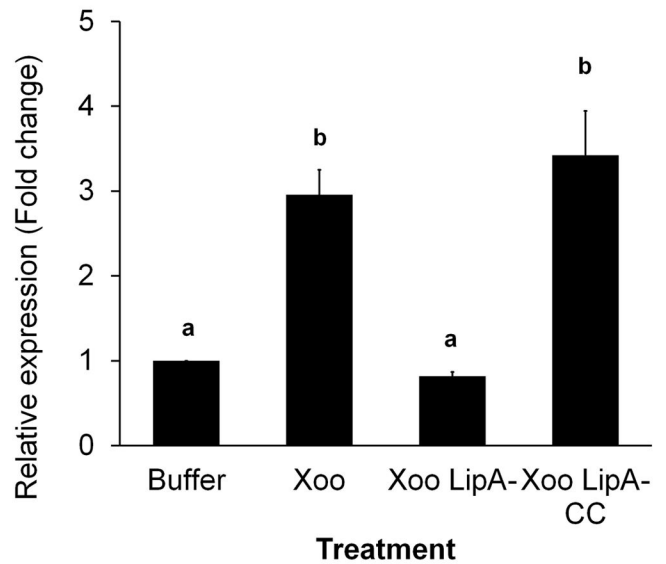



## Figure 2

**A**

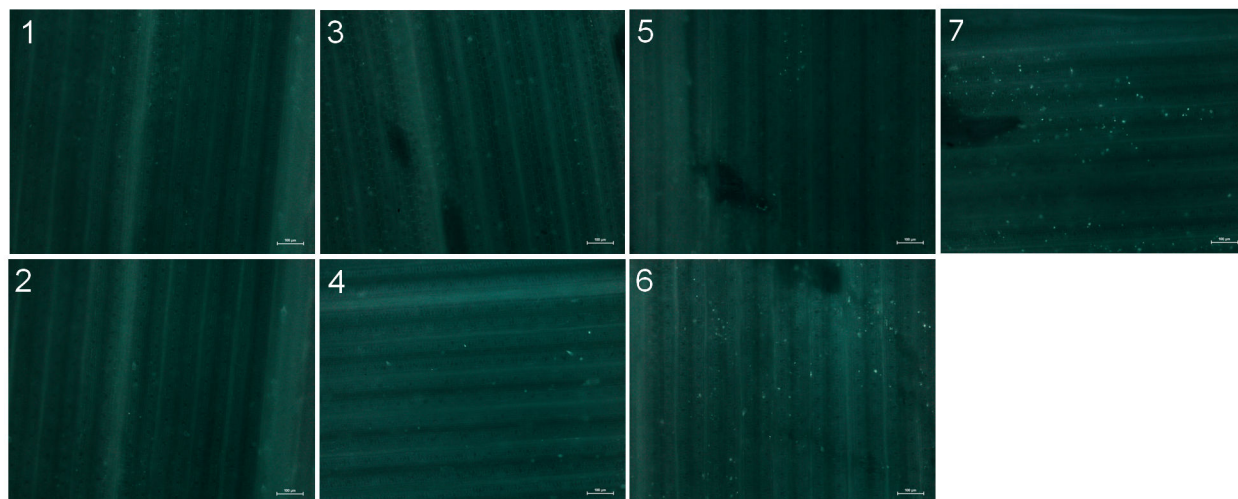

**B**

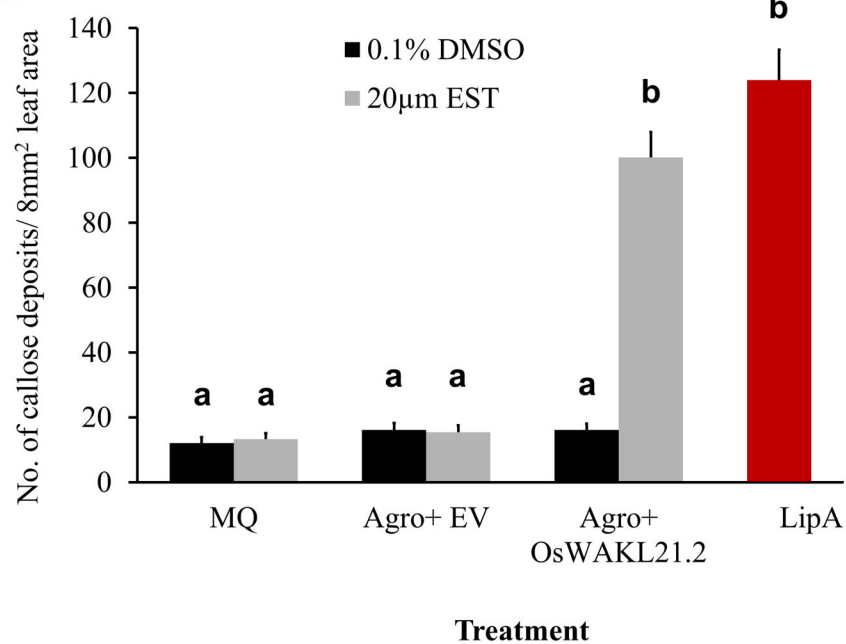

**C**

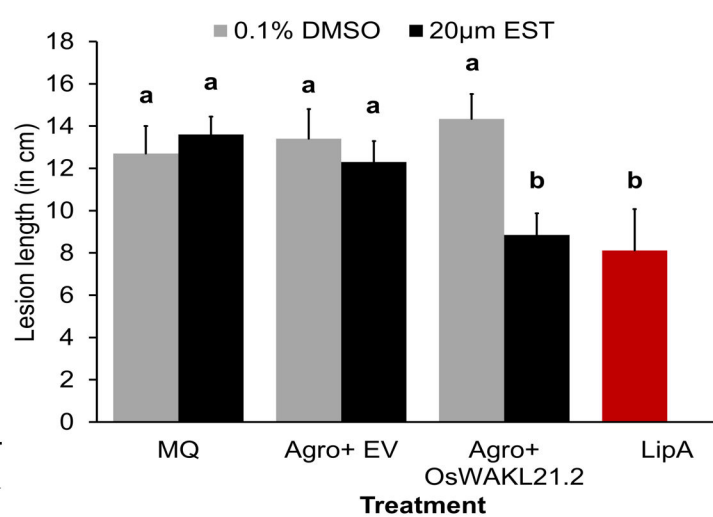

**D**

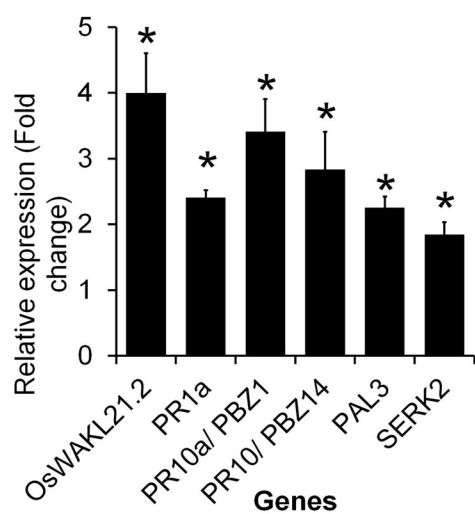

## Figure 3

**A**

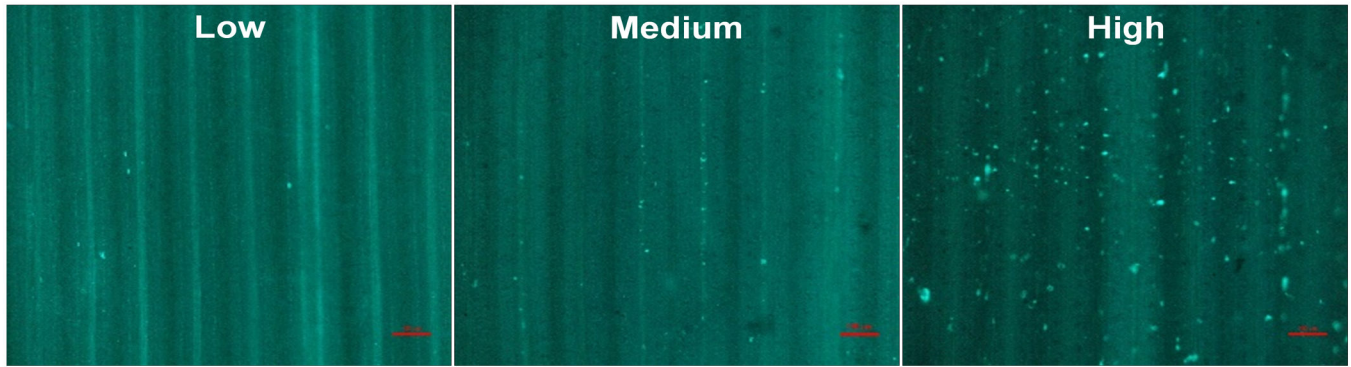

**B**

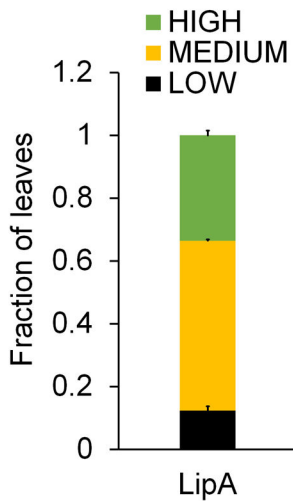

**C**

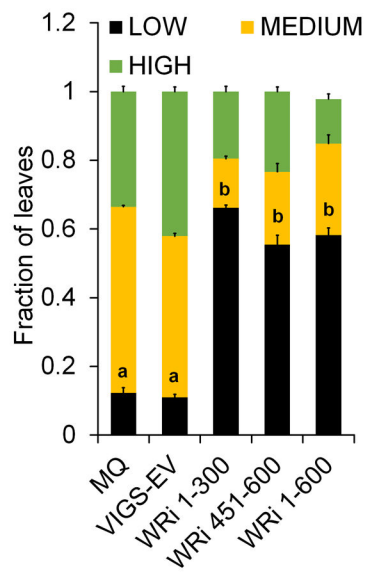

**D**

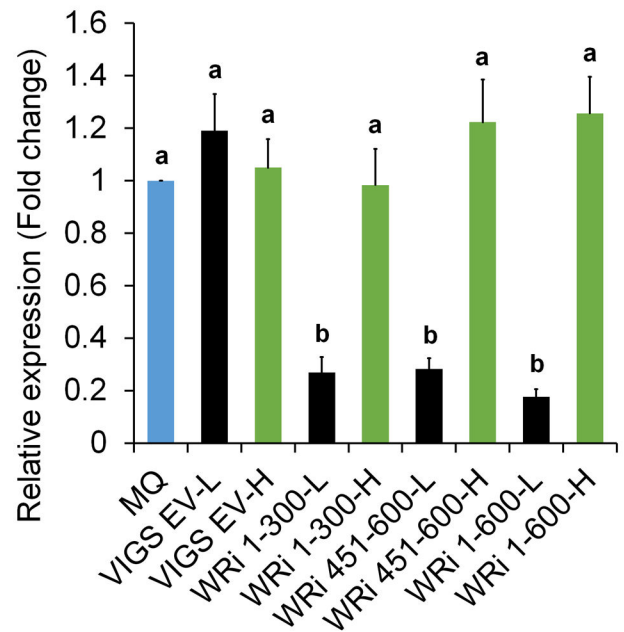

**E**

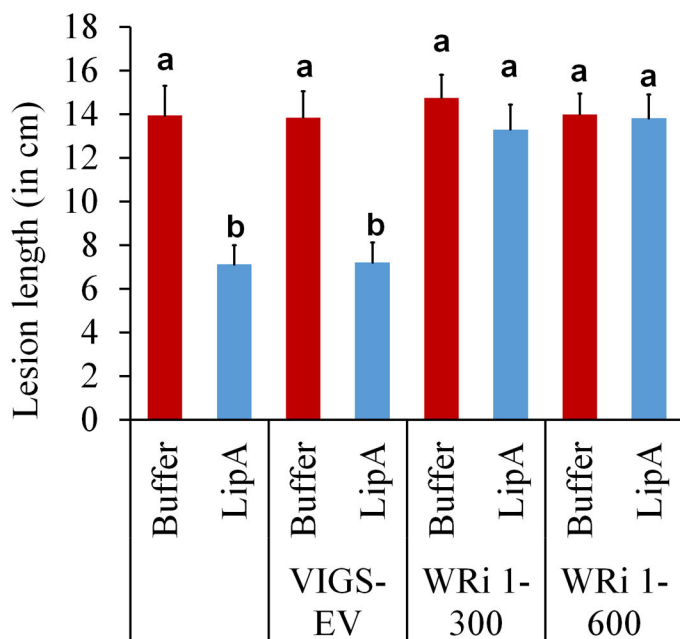

**F**

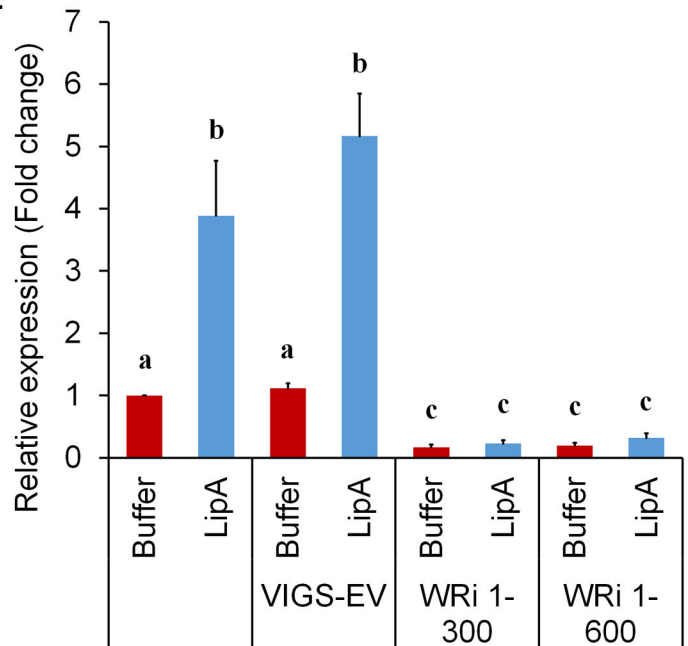

## Figure 4

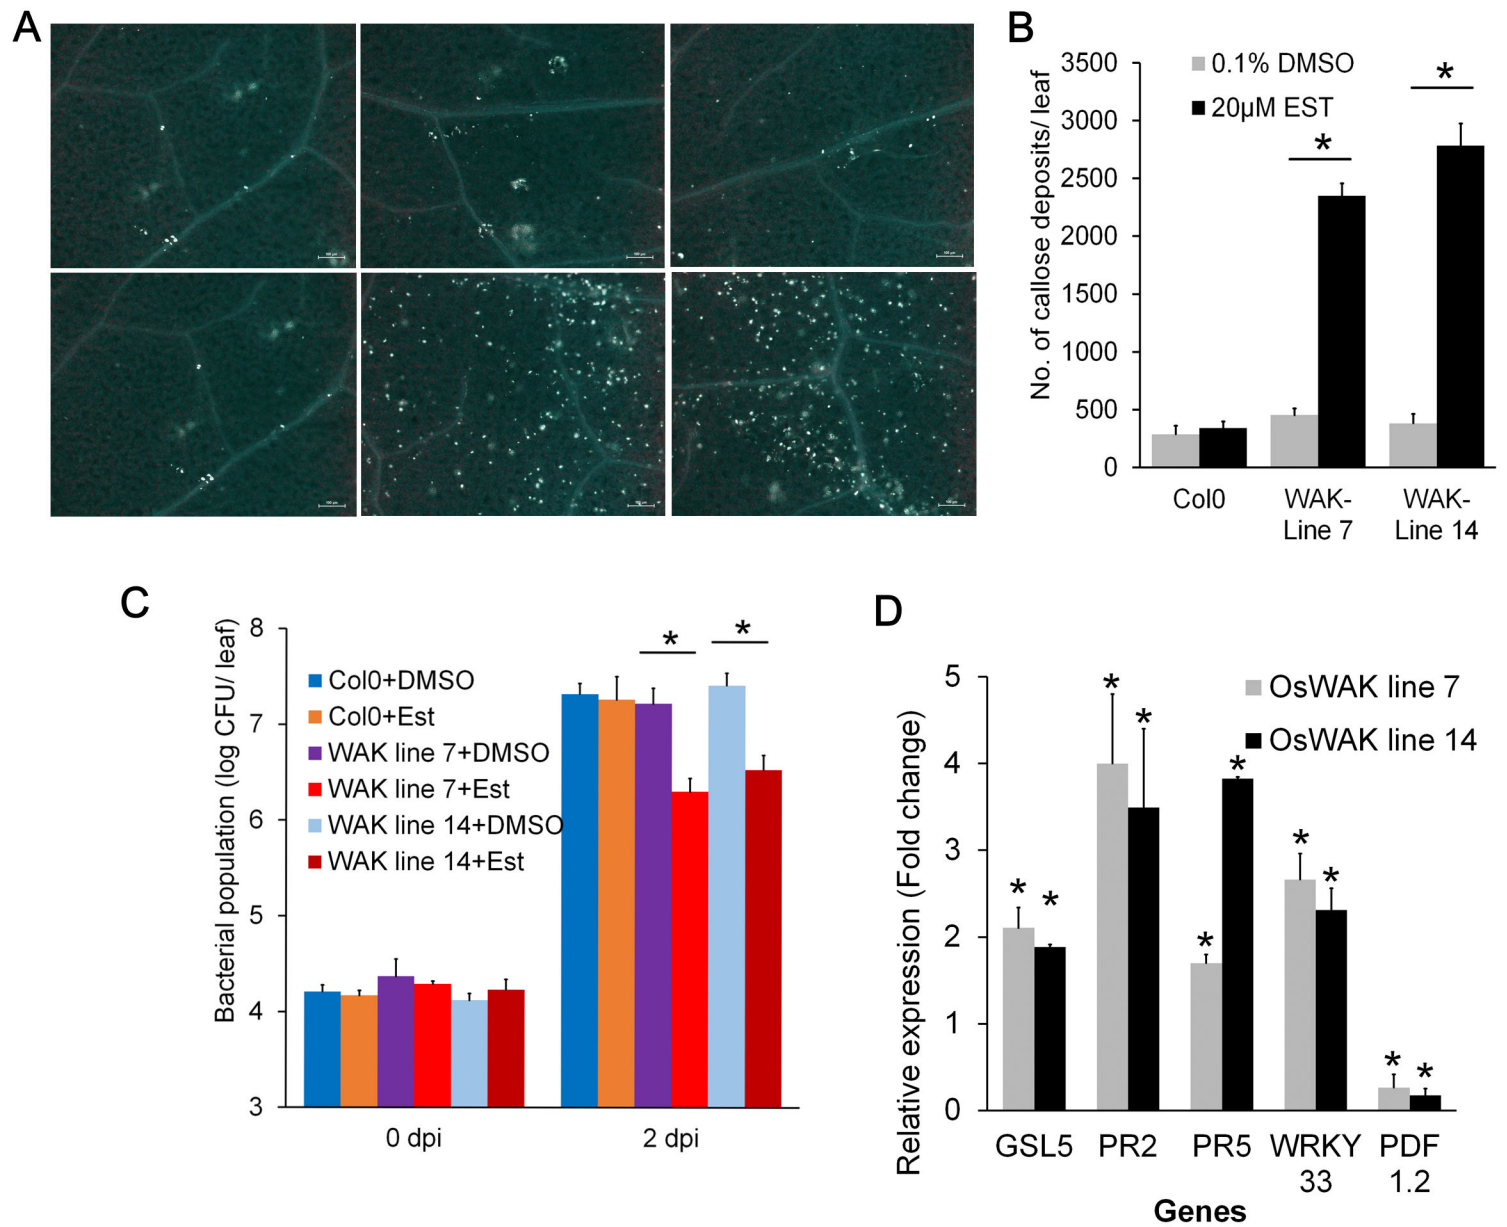

## Figure 5

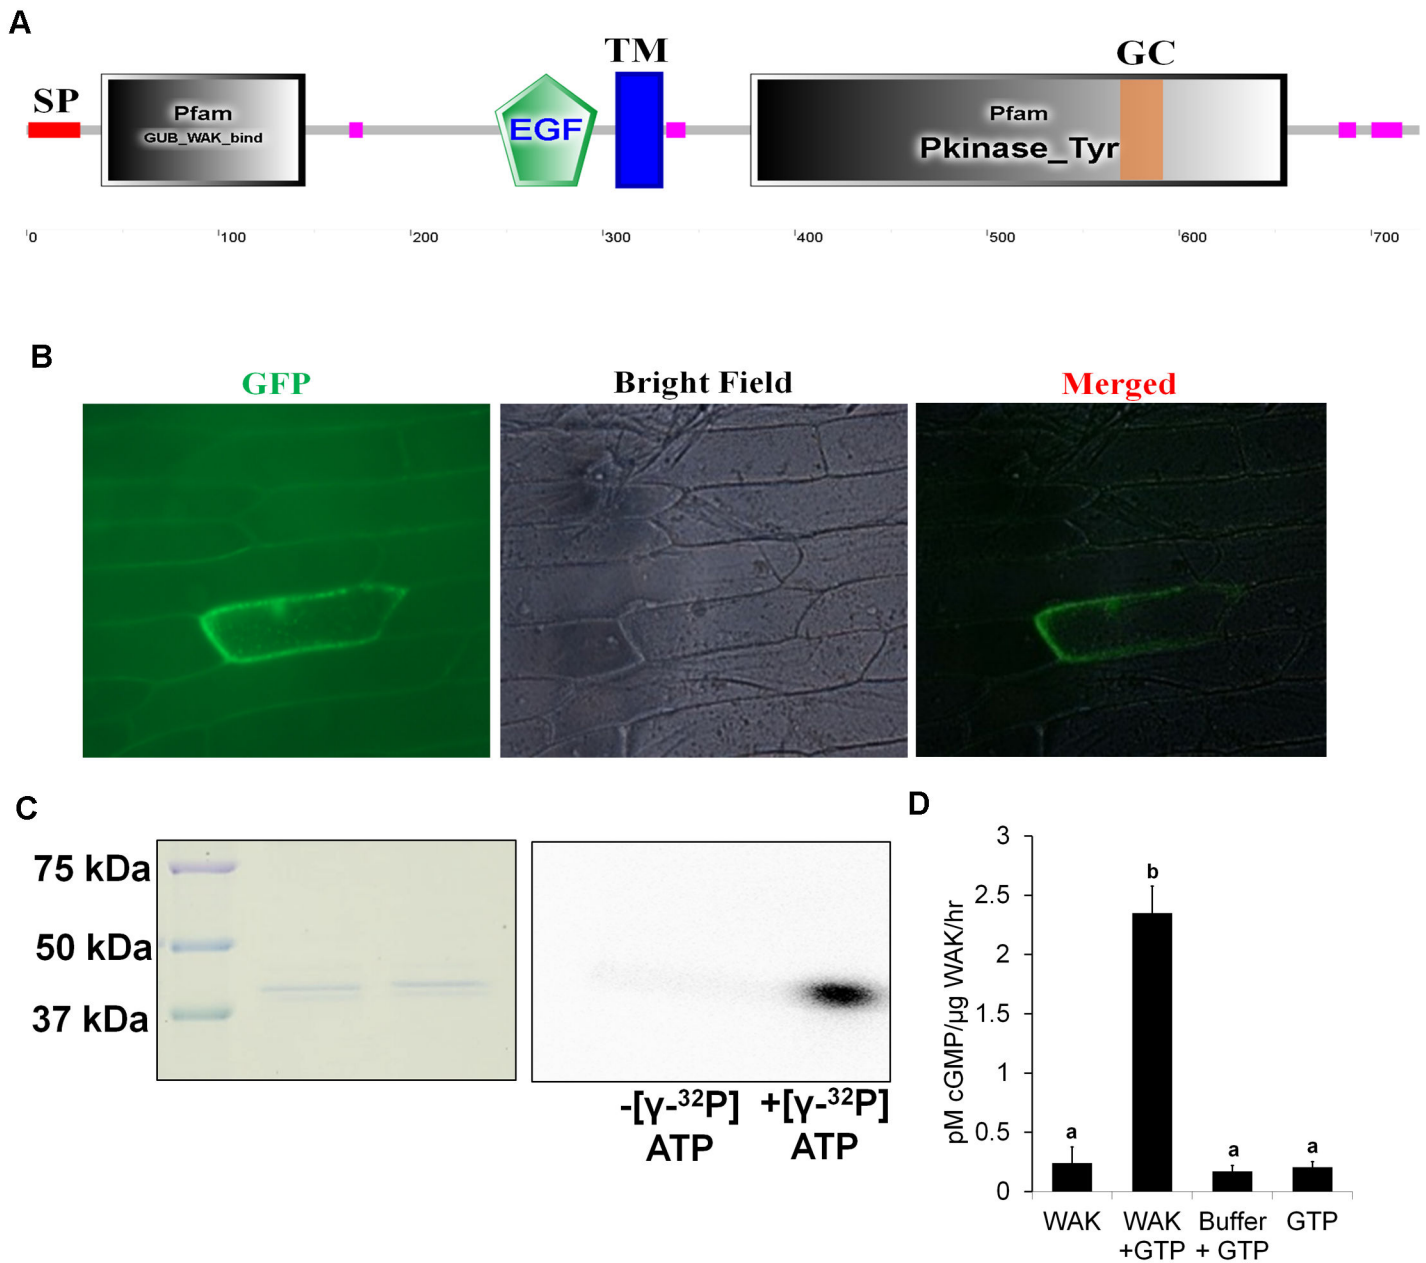

## Figure 6

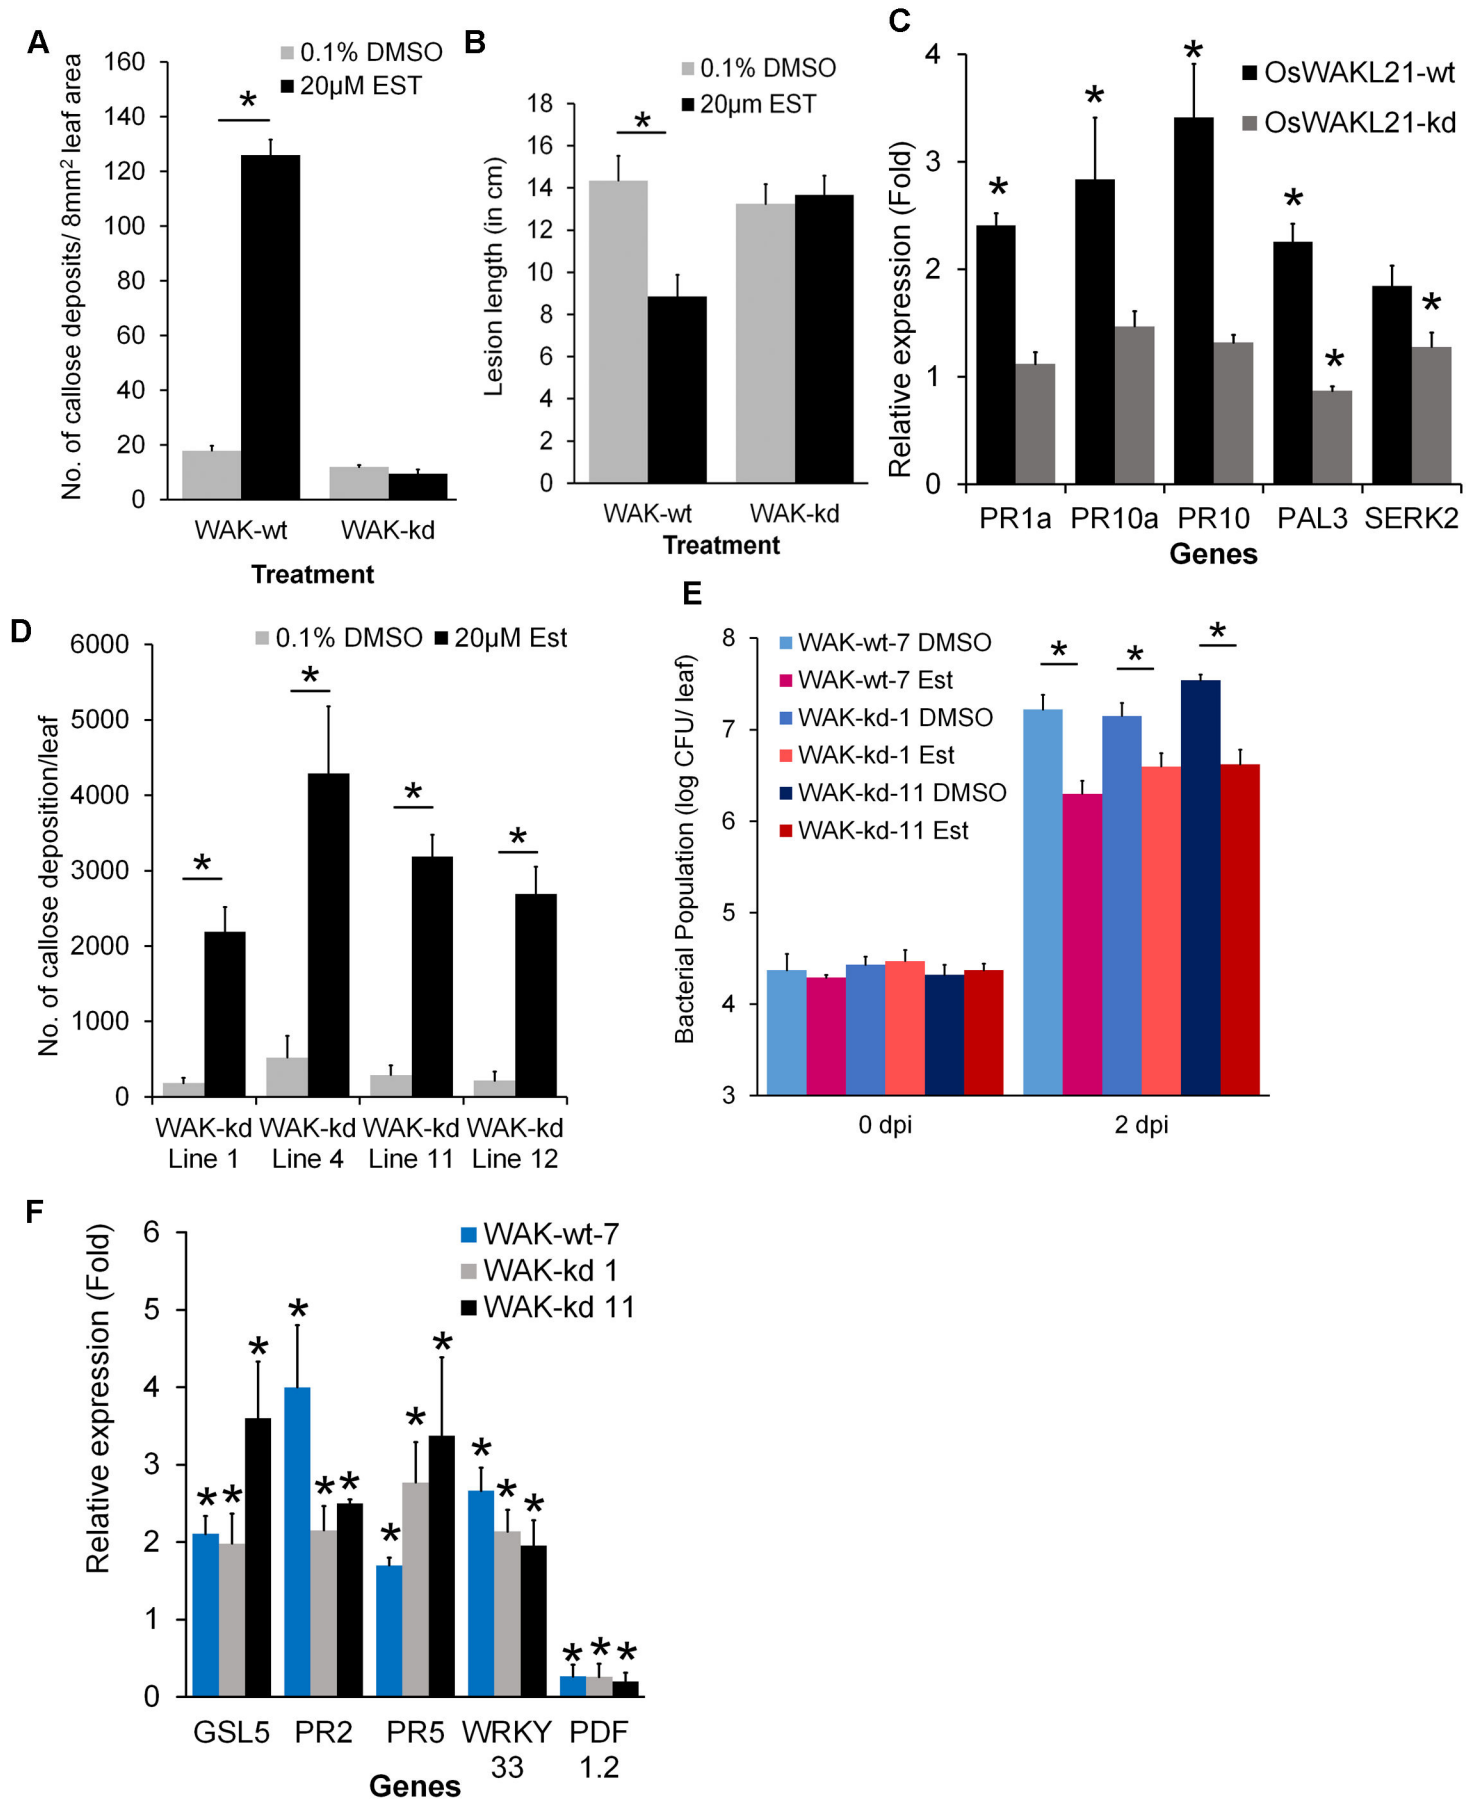

## Figure 7

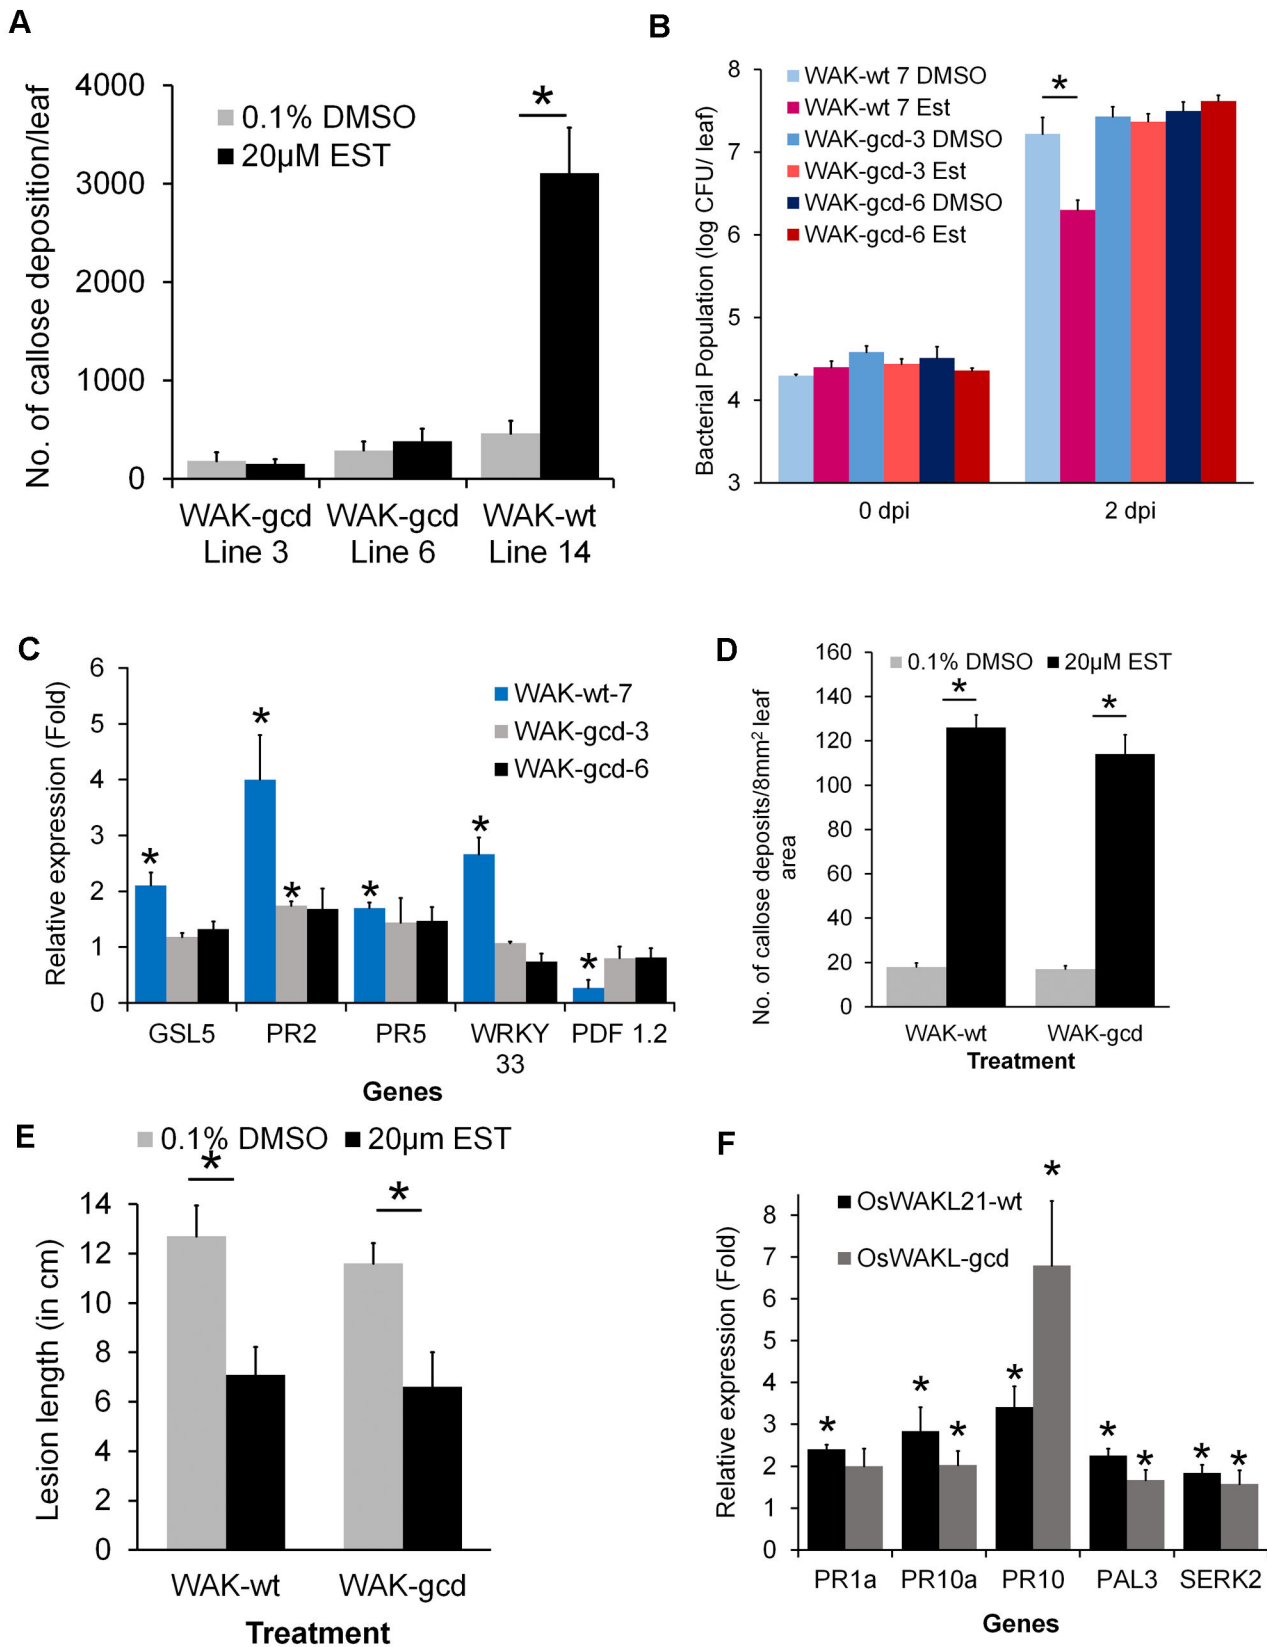

## Figure 8

**A**

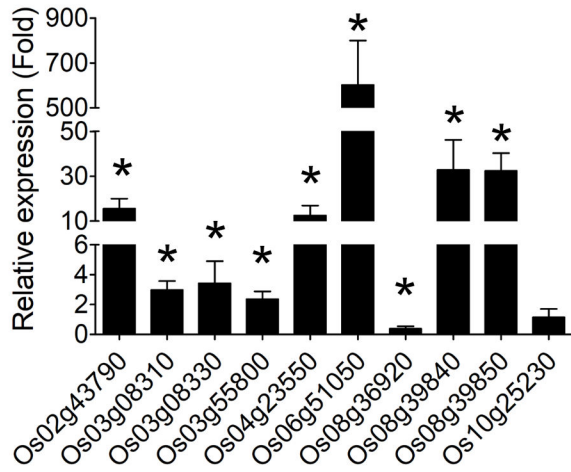

**B**

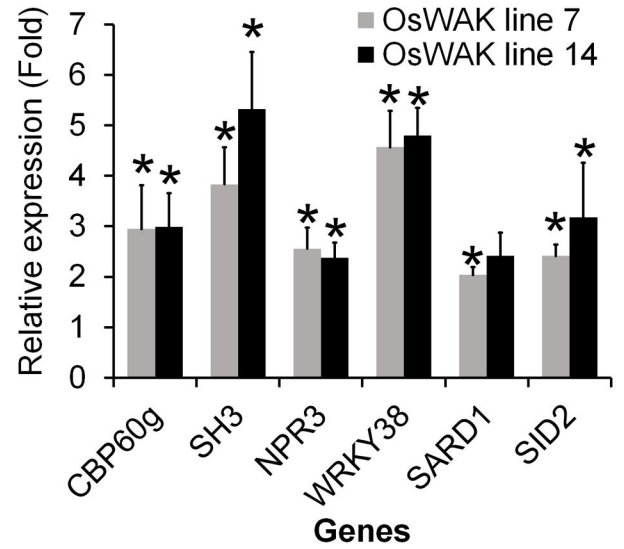

**C**

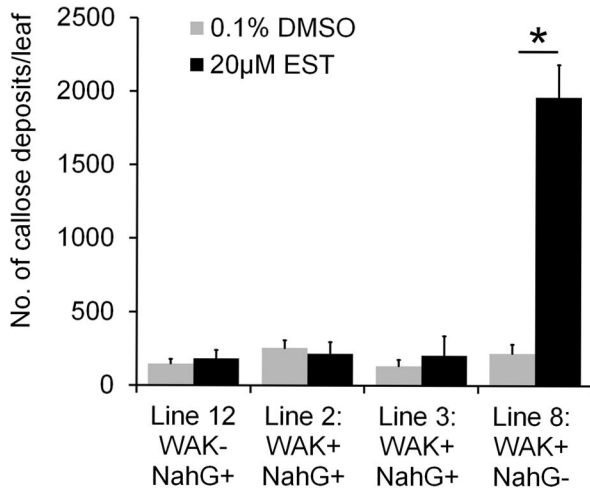

**D**

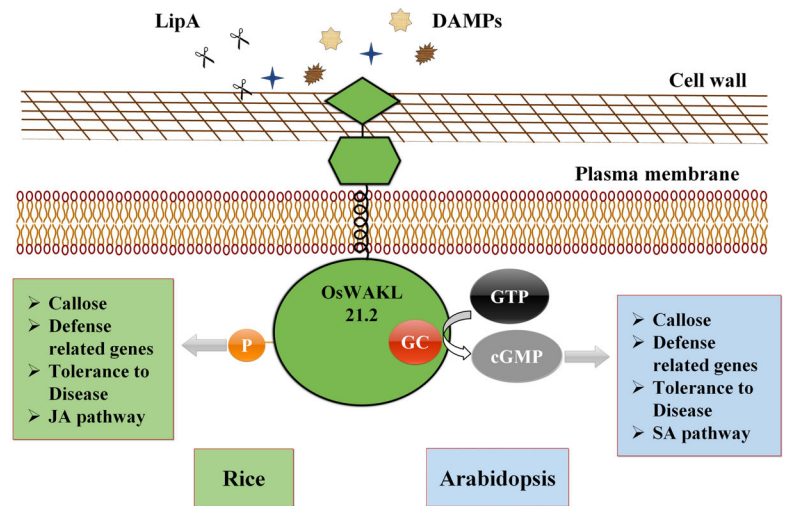

Source: https://www.biorxiv.org/content/biorxiv/early/2019/09/03/754234.full.pdf
